# Supplementary material for: The tumor microenvironment in gastrointestinal adenocarcinomas revealed a prognostic and immunotherapeutic biomarker
Source: Aging (Albany NY). 2022 Dec 30;14(24):10171–216. doi: 10.18632/aging.204463 (PMC9831739; doi:10.18632/aging.204463)
Supplement: Supplementary Tables 1-3, 5-8, 12-15, 17, 18, 20, 21 [file aging-14-204463-s002.xlsx]

## Sheet: Supplementary Table 1
Supplementary Table 1. The 160 signatures from 7 sources download from PanImmune_GeneSet.
Source	SetName
Senbabaoglu	Angiogenesis
Senbabaoglu	APM1
Senbabaoglu	APM2
Wolf	ICS5_score
Wolf	LIexpression_score
Wolf	Chemokine12_score
Wolf	NHI_5gene_score
Wolf	CD68
Wolf	CD8A
Wolf	PD1_data
Wolf	PDL1_data
Wolf	PD1_PDL1_score
Wolf	CTLA4_data
Wolf	Bcell_mg_IGJ
Wolf	Bcell_receptors_score
Wolf	STAT1_score
Wolf	CSF1_response
Wolf	TcClassII_score
Wolf	IL12_score_21050467
Wolf	IL4_score_21050467
Wolf	IL2_score_21050467
Wolf	IL13_score_21050467
Wolf	IFNG_score_21050467
Wolf	TGFB_score_21050467
Wolf	TREM1_data
Wolf	DAP12_data
Wolf	Tcell_receptors_score
Wolf	IL8_21978456
Wolf	IFN_21978456
Wolf	MHC1_21978456
Wolf	MHC2_21978456
Wolf	Bcell_21978456
Wolf	Tcell_21978456
Wolf	CD103pos_mean_25446897
Wolf	CD103neg_mean_25446897
Wolf	IgG_19272155
Wolf	Interferon_19272155
Wolf	LCK_19272155
Wolf	MHC.I_19272155
Wolf	MHC.II_19272155
Wolf	STAT1_19272155
Wolf	Troester_WoundSig_19887484
Wolf	MDACC.FNA.1_20805453
Wolf	IGG_Cluster_21214954
Wolf	Minterferon_Cluster_21214954
Wolf	Immune_cell_Cluster_21214954
Wolf	MCD3_CD8_21214954
Wolf	Interferon_Cluster_21214954
Wolf	B_cell_PCA_16704732
Wolf	CD8_PCA_16704732
Wolf	GRANS_PCA_16704732
Wolf	LYMPHS_PCA_16704732
Wolf	T_cell_PCA_16704732
Wolf	TGFB_PCA_17349583
Wolf	Rotterdam_ERneg_PCA_15721472
Wolf	HER2_Immune_PCA_18006808
Wolf	IR7_score
Wolf	Buck14_score
Wolf	TAMsurr_score
Wolf	Immune_NSCLC_score
Wolf	Module3_IFN_score
Wolf	Module4_TcellBcell_score
Wolf	Module5_TcellBcell_score
Wolf	Module11_Prolif_score
Wolf	GP11_Immune_IFN
Wolf	KEGG_HEMATOPOIETIC_CELL_LINEAGE
Wolf	CD8_CD68_ratio
Wolf	TAMsurr_TcClassII_ratio
Wolf	CHANG_CORE_SERUM_RESPONSE_UP
Wolf	CSR_Activated_15701700
Wolf	CD103pos_CD103neg_ratio_25446897
Attractors	LYM
Attractors	IFIT3
Attractors	G_GIMAP4
Attractors	G_HLA-DPA1
Attractors	G_SLAMF6
Attractors	G_LILRB4
Attractors	G_SIGLEC9
Attractors	G_CYTH4
Attractors	G_CD3E
ICR	ICR_SCORE
ICR	ICR_INHIB_SCORE
ICR	ICR_ACT_SCORE
c7atoms	C7_Atom_1
c7atoms	C7_Atom_2
c7atoms	C7_Atom_3
c7atoms	C7_Atom_4
c7atoms	C7_Atom_5
c7atoms	C7_Atom_6
c7atoms	C7_Atom_7
c7atoms	C7_Atom_8
c7atoms	C7_Atom_9
c7atoms	C7_Atom_10
c7atoms	C7_Atom_11
c7atoms	C7_Atom_12
c7atoms	C7_Atom_13
c7atoms	C7_Atom_14
c7atoms	C7_Atom_15
c7atoms	C7_Atom_16
c7atoms	C7_Atom_17
c7atoms	C7_Atom_18
c7atoms	C7_Atom_19
c7atoms	C7_Atom_20
c7atoms	C7_Atom_21
c7atoms	C7_Atom_22
c7atoms	C7_Atom_23
c7atoms	C7_Atom_24
c7atoms	C7_Atom_25
c7atoms	C7_Atom_26
c7atoms	C7_Atom_27
c7atoms	C7_Atom_28
c7atoms	C7_Atom_29
c7atoms	C7_Atom_30
c7atoms	C7_Atom_31
c7atoms	C7_Atom_32
Bindea	aDC
Bindea	B cells
Bindea	CD8 T cells
Bindea	Cytotoxic cells
Bindea	DC
Bindea	Eosinophils
Bindea	iDC
Bindea	Lymph vessels
Bindea	Macrophages
Bindea	Mast cells
Bindea	Neutrophils
Bindea	NK CD56bright cells
Bindea	NK CD56dim cells
Bindea	NK cells
Bindea	pDC
Bindea	T cells
Bindea	T helper cells
Bindea	Tcm cells
Bindea	Tem cells
Bindea	Tfh cells
Bindea	Tgd cells
Bindea	Th1 cells
Bindea	Th17 cells
Bindea	Th2 cells
Bindea	Treg cells
Cibersort	B.cells.naive
Cibersort	B.cells.memory
Cibersort	Plasma.cells
Cibersort	T.cells.CD8
Cibersort	T.cells.CD4.naive
Cibersort	T.cells.CD4.memory.resting
Cibersort	T.cells.CD4.memory.activated
Cibersort	T.cells.follicular.helper
Cibersort	T.cells.regulatory..Tregs.
Cibersort	T.cells.gamma.delta
Cibersort	NK.cells.resting
Cibersort	NK.cells.activated
Cibersort	Monocytes
Cibersort	Macrophages.M0
Cibersort	Macrophages.M1
Cibersort	Macrophages.M2
Cibersort	Dendritic.cells.resting
Cibersort	Dendritic.cells.activated
Cibersort	Mast.cells.resting
Cibersort	Mast.cells.activated

## Sheet: Supplementary Table 2
Supplementary Table 2. The genes from 160 signatures download from PanImmune_GeneSet.
SetName	Gene
IR7_score	C1QA
IR7_score	IGLC2
IR7_score	LY9
IR7_score	TNFRSF17
IR7_score	SPP1
IR7_score	XCL2
IR7_score	HLA-F
Buck14_score	CXCL13
Buck14_score	CLIC5
Buck14_score	RGS4
Buck14_score	RPS28
Buck14_score	RFX7
Buck14_score	EXOC7
Buck14_score	HAPLN1
Buck14_score	ZNF3
Buck14_score	SSX3
Buck14_score	HRBL
Buck14_score	PRRG3
Buck14_score	ABO
Buck14_score	PRTN3
Buck14_score	MATN1
ICS5_score	CXCL13
ICS5_score	CLIC5
ICS5_score	HLA-F
ICS5_score	TNFRSF17
ICS5_score	XCL2
LIexpression_score	CCL5
LIexpression_score	CD19
LIexpression_score	CD37
LIexpression_score	CD3D
LIexpression_score	CD3E
LIexpression_score	CD3G
LIexpression_score	CD3Z
LIexpression_score	CD79A
LIexpression_score	CD79B
LIexpression_score	CD8A
LIexpression_score	CD8B1
LIexpression_score	IGHG3
LIexpression_score	IGJ
LIexpression_score	IGLC1
LIexpression_score	CD14
LIexpression_score	LCK
LIexpression_score	LTB
LIexpression_score	MS4A1
Chemokine12_score	CCL2
Chemokine12_score	CCL3
Chemokine12_score	CCL4
Chemokine12_score	CCL5
Chemokine12_score	CCL8
Chemokine12_score	CCL18
Chemokine12_score	CCL19
Chemokine12_score	CCL21
Chemokine12_score	CXCL9
Chemokine12_score	CXCL10
Chemokine12_score	CXCL11
Chemokine12_score	CXCL13
NHI_5gene_score	IGK
NHI_5gene_score	GBP1
NHI_5gene_score	STAT1
NHI_5gene_score	IGLL5
NHI_5gene_score	OCLN
CD68	CD68
CD8A	CD8A
CD8_CD68_ratio	CD8A
CD8_CD68_ratio	CD68
PD1_data	PDCD1
PDL1_data	CD274
PD1_PDL1_score	PDCD1
PD1_PDL1_score	CD274
CTLA4_data	CTLA4
Bcell_mg_IGJ	IGL
Bcell_mg_IGJ	IGHM
Bcell_mg_IGJ	IGHG3
Bcell_mg_IGJ	IGHV1-69
Bcell_mg_IGJ	LOC652128
Bcell_mg_IGJ	IGKC
Bcell_mg_IGJ	IGLJ3
Bcell_mg_IGJ	IGJ
Bcell_mg_IGJ	IL8
Bcell_mg_IGJ	NTN2L
Bcell_mg_IGJ	CTA-246H3.1
Bcell_mg_IGJ	IGKV1D-13
Bcell_mg_IGJ	IFI6
Bcell_mg_IGJ	IGHA1
Bcell_mg_IGJ	IGKV1OR2-108
Bcell_mg_IGJ	IGKV1OR15-118
Bcell_receptors_score	CD19
Bcell_receptors_score	CD1C
Bcell_receptors_score	CD1D
Bcell_receptors_score	CD20
Bcell_receptors_score	CD200
Bcell_receptors_score	CD22
Bcell_receptors_score	CD24
Bcell_receptors_score	CD38
Bcell_receptors_score	CD72
Bcell_receptors_score	CD74
Bcell_receptors_score	CD79A
Bcell_receptors_score	CD79B
Bcell_receptors_score	CD83
Bcell_receptors_score	CD86
Bcell_receptors_score	FCGR2B
STAT1_score	STAT1
STAT1_score	CXCL10
STAT1_score	TAP1
STAT1_score	CXCL11
STAT1_score	INDO
STAT1_score	CXCL9
STAT1_score	MX1
STAT1_score	LAMP3
STAT1_score	ISG15
STAT1_score	RTP4
STAT1_score	HERC6
STAT1_score	IFI44L
STAT1_score	MX2
STAT1_score	IFIT3
STAT1_score	HERC5
STAT1_score	RSAD2
STAT1_score	DDX58
STAT1_score	CCL5
STAT1_score	ADAMDEC1
STAT1_score	CD2
STAT1_score	HCP5
STAT1_score	NMI
STAT1_score	SPOCK2
STAT1_score	CCL8
STAT1_score	TRIM22
STAT1_score	LYZ
STAT1_score	IRF1
STAT1_score	LAG3
STAT1_score	PSCDBP
STAT1_score	TFEC
STAT1_score	UBD
STAT1_score	SP140
STAT1_score	CTSC
STAT1_score	IFI6
STAT1_score	PLA2G7
STAT1_score	CD3G
STAT1_score	ECGF1
STAT1_score	PLAC8
STAT1_score	FGL2
STAT1_score	GZMK
STAT1_score	CD48
STAT1_score	STAT4
STAT1_score	GPR18
STAT1_score	P2RX5
STAT1_score	IFI30
STAT1_score	SH2D1A
STAT1_score	LAPTM5
STAT1_score	CD69
STAT1_score	PTPN7
STAT1_score	IRF8
STAT1_score	PIM2
STAT1_score	ETV7
STAT1_score	GPR171
STAT1_score	PSME1
STAT1_score	BIRC3
STAT1_score	FASLG
STAT1_score	IFITM1
STAT1_score	IFIT5
STAT1_score	ITGB2
STAT1_score	BTN3A2
STAT1_score	HCLS1
STAT1_score	SECTM1
STAT1_score	ARHGAP15
STAT1_score	KLRK1
STAT1_score	IGSF6
STAT1_score	EBI2
STAT1_score	SNX10
STAT1_score	BST2
STAT1_score	APOC1
STAT1_score	ZC3HAV1
STAT1_score	DDAH2
STAT1_score	LILRA4
STAT1_score	EBI3
STAT1_score	KLRC3
STAT1_score	CLEC4A
STAT1_score	CD40LG
STAT1_score	VAV1
STAT1_score	GLRX
STAT1_score	ACP5
STAT1_score	RFX5
STAT1_score	CECR1
STAT1_score	TRAF3
STAT1_score	RAB8A
STAT1_score	IL18
STAT1_score	EFNA1
STAT1_score	RASGRP1
STAT1_score	REC8L1
STAT1_score	CCRL2
STAT1_score	DNAL4
CSF1_response	CORO1A
CSF1_response	MNDA
CSF1_response	CCRL2
CSF1_response	SLC7A7
CSF1_response	HLA-DMA
CSF1_response	FYB
CSF1_response	RNASE6
CSF1_response	TLR2
CSF1_response	CTSC
CSF1_response	LILRB4
CSF1_response	PSCDBP
CSF1_response	CTSS
CSF1_response	RASSF4
CSF1_response	MSN
CSF1_response	CYBB
CSF1_response	LAPTM5
CSF1_response	DOCK2
CSF1_response	FCGR1A
CSF1_response	EVI2B
CSF1_response	ADCY7
CSF1_response	CD48
CSF1_response	ARHGAP15
CSF1_response	ARRB2
CSF1_response	SYK
CSF1_response	BTK
CSF1_response	TNFAIP3
CSF1_response	FCGR2A
CSF1_response	VSIG4
CSF1_response	FPRL2
CSF1_response	IL10RA
CSF1_response	IFI16
CSF1_response	ITGB2
CSF1_response	IL7R
CSF1_response	TBXAS1
CSF1_response	FMNL1
CSF1_response	FLI1
CSF1_response	RASSF2
CSF1_response	LYZ
CSF1_response	CD163
CSF1_response	CD97
CSF1_response	CCL2
CSF1_response	FCGR2B
CSF1_response	MERTK
CSF1_response	CD84
CSF1_response	CD53
CSF1_response	CD86
CSF1_response	HMHA1
CSF1_response	CTSL
CSF1_response	EVI2A
CSF1_response	TNFRSF1B
CSF1_response	CXCR4
CSF1_response	LCP1
CSF1_response	SAMHD1
CSF1_response	CPVL
CSF1_response	HLA-DRB1
CSF1_response	C13orf18
CSF1_response	GIMAP4
CSF1_response	SAMSN1
CSF1_response	PLCG2
CSF1_response	OSBPL3
CSF1_response	CD8A
CSF1_response	RUNX3
CSF1_response	FCGR3A
CSF1_response	AMPD3
CSF1_response	MYO1F
CSF1_response	CECR1
CSF1_response	LYN
CSF1_response	MPP1
CSF1_response	LRMP
CSF1_response	FGL2
CSF1_response	NCKAP1L
CSF1_response	HCLS1
CSF1_response	SELL
CSF1_response	CASP1
CSF1_response	SELPLG
CSF1_response	CD33
CSF1_response	GPNMB
CSF1_response	NCF2
CSF1_response	FNBP1
CSF1_response	IL18
CSF1_response	B2M
CSF1_response	SP140
CSF1_response	FCER1G
CSF1_response	LCP2
CSF1_response	LY86
CSF1_response	LAIR1
CSF1_response	IFI30
CSF1_response	TNFSF13B
CSF1_response	LST1
CSF1_response	FGR
CSF1_response	NPL
CSF1_response	PLEK
CSF1_response	CCL5
CSF1_response	PTPRC
CSF1_response	GNPTAB
CSF1_response	SLC1A3
CSF1_response	HCK
CSF1_response	NPC2
CSF1_response	C3AR1
CSF1_response	PIK3CG
CSF1_response	DAPK1
CSF1_response	ALOX5AP
CSF1_response	CSF1R
CSF1_response	CUGBP2
CSF1_response	APOE
CSF1_response	APOC1
CSF1_response	CD52
CSF1_response	LHFPL2
CSF1_response	C1orf54
CSF1_response	IKZF1
CSF1_response	SH2B3
CSF1_response	WIPF1
Module3_IFN_score	IFI44
Module3_IFN_score	IFI44L
Module3_IFN_score	DDX58
Module3_IFN_score	IFI6
Module3_IFN_score	IFI27
Module3_IFN_score	IFIT2
Module3_IFN_score	IFIT1
Module3_IFN_score	IFIT3
Module3_IFN_score	CXCL10
Module3_IFN_score	MX1
Module3_IFN_score	OAS1
Module3_IFN_score	OAS2
Module3_IFN_score	OAS3
Module3_IFN_score	HERC5
Module3_IFN_score	SAMD9
Module3_IFN_score	HERC6
Module3_IFN_score	DDX60
Module3_IFN_score	RTP4
Module3_IFN_score	IFIH1
Module3_IFN_score	STAT1
Module3_IFN_score	TAP1
Module3_IFN_score	OASL
Module3_IFN_score	RSAD2
Module3_IFN_score	ISG15
Module4_TcellBcell_score	CD96
Module4_TcellBcell_score	CD52
Module4_TcellBcell_score	SEMA4D
Module4_TcellBcell_score	CXCL13
Module4_TcellBcell_score	SP140
Module4_TcellBcell_score	CCR7
Module4_TcellBcell_score	CTSW
Module4_TcellBcell_score	DOCK2
Module4_TcellBcell_score	EVI2B
Module4_TcellBcell_score	FCN1
Module4_TcellBcell_score	KLRK1
Module4_TcellBcell_score	FLI1
Module4_TcellBcell_score	PLCL2
Module4_TcellBcell_score	FYB
Module4_TcellBcell_score	IPCEF1
Module4_TcellBcell_score	PPP1R16B
Module4_TcellBcell_score	CCDC69
Module4_TcellBcell_score	STAP1
Module4_TcellBcell_score	GPR18
Module4_TcellBcell_score	ICOS
Module4_TcellBcell_score	GPR171
Module4_TcellBcell_score	GZMA
Module4_TcellBcell_score	GZMB
Module4_TcellBcell_score	GZMK
Module4_TcellBcell_score	IGJ
Module4_TcellBcell_score	IL2RB
Module4_TcellBcell_score	IL2RG
Module4_TcellBcell_score	IL7R
Module4_TcellBcell_score	ITGA4
Module4_TcellBcell_score	ITK
Module4_TcellBcell_score	KLRB1
Module4_TcellBcell_score	LCK
Module4_TcellBcell_score	LGALS2
Module4_TcellBcell_score	LRMP
Module4_TcellBcell_score	LTB
Module4_TcellBcell_score	SH2D1A
Module4_TcellBcell_score	CXCL9
Module4_TcellBcell_score	NCF4
Module4_TcellBcell_score	GIMAP6
Module4_TcellBcell_score	IL21R
Module4_TcellBcell_score	TRAT1
Module4_TcellBcell_score	PLAC8
Module4_TcellBcell_score	UBASH3A
Module4_TcellBcell_score	POU2AF1
Module4_TcellBcell_score	RHOF
Module4_TcellBcell_score	LAX1
Module4_TcellBcell_score	BANK1
Module4_TcellBcell_score	SIRPG
Module4_TcellBcell_score	PRF1
Module4_TcellBcell_score	DOCK10
Module4_TcellBcell_score	PRKCB
Module4_TcellBcell_score	CRTAM
Module4_TcellBcell_score	PTGDS
Module4_TcellBcell_score	PTPRC
Module4_TcellBcell_score	PTPRCAP
Module4_TcellBcell_score	TNFRSF17
Module4_TcellBcell_score	CCL19
Module4_TcellBcell_score	SELL
Module4_TcellBcell_score	BCL11B
Module4_TcellBcell_score	SLAMF1
Module4_TcellBcell_score	TNFRSF1B
Module4_TcellBcell_score	CCR2
Module4_TcellBcell_score	TRAF3IP3
Module4_TcellBcell_score	TCL1A
Module4_TcellBcell_score	VNN2
Module4_TcellBcell_score	PSTPIP1
Module4_TcellBcell_score	CD2
Module4_TcellBcell_score	CD3G
Module4_TcellBcell_score	CD247
Module4_TcellBcell_score	CD7
Module4_TcellBcell_score	CD8A
Module4_TcellBcell_score	CD19
Module4_TcellBcell_score	MS4A1
Module4_TcellBcell_score	CD27
Module4_TcellBcell_score	AIM2
Module4_TcellBcell_score	CD37
Module4_TcellBcell_score	CYTIP
Module4_TcellBcell_score	CD69
Module4_TcellBcell_score	CD79A
Module4_TcellBcell_score	FAM65B
Module4_TcellBcell_score	KIAA0125
Module4_TcellBcell_score	P2RY14
Module5_TcellBcell_score	IGSF6
Module5_TcellBcell_score	LILRB2
Module5_TcellBcell_score	BTN3A3
Module5_TcellBcell_score	UBD
Module5_TcellBcell_score	CXCL13
Module5_TcellBcell_score	GNLY
Module5_TcellBcell_score	CXCR6
Module5_TcellBcell_score	CTSC
Module5_TcellBcell_score	HCP5
Module5_TcellBcell_score	PIM2
Module5_TcellBcell_score	SP140
Module5_TcellBcell_score	CCR7
Module5_TcellBcell_score	CTSS
Module5_TcellBcell_score	CYBB
Module5_TcellBcell_score	FCN1
Module5_TcellBcell_score	TFEC
Module5_TcellBcell_score	SEL1L3
Module5_TcellBcell_score	FYB
Module5_TcellBcell_score	GBP1
Module5_TcellBcell_score	LAMP3
Module5_TcellBcell_score	ADAMDEC1
Module5_TcellBcell_score	GPR18
Module5_TcellBcell_score	ICOS
Module5_TcellBcell_score	GPR171
Module5_TcellBcell_score	GZMH
Module5_TcellBcell_score	GZMB
Module5_TcellBcell_score	GZMK
Module5_TcellBcell_score	BIRC3
Module5_TcellBcell_score	IFNG
Module5_TcellBcell_score	IL2RG
Module5_TcellBcell_score	IL15
Module5_TcellBcell_score	IDO1
Module5_TcellBcell_score	CXCL10
Module5_TcellBcell_score	IRF1
Module5_TcellBcell_score	ISG20
Module5_TcellBcell_score	ITK
Module5_TcellBcell_score	LAG3
Module5_TcellBcell_score	LCK
Module5_TcellBcell_score	LYN
Module5_TcellBcell_score	CXCL9
Module5_TcellBcell_score	NKG7
Module5_TcellBcell_score	TRAT1
Module5_TcellBcell_score	MGC29506
Module5_TcellBcell_score	PLAC8
Module5_TcellBcell_score	POU2AF1
Module5_TcellBcell_score	CRTAM
Module5_TcellBcell_score	SLAMF8
Module5_TcellBcell_score	PSMB9
Module5_TcellBcell_score	PTPN7
Module5_TcellBcell_score	SLAMF7
Module5_TcellBcell_score	BCL2A1
Module5_TcellBcell_score	TNFRSF17
Module5_TcellBcell_score	CCL5
Module5_TcellBcell_score	CCL8
Module5_TcellBcell_score	CCL13
Module5_TcellBcell_score	CCL18
Module5_TcellBcell_score	CCL19
Module5_TcellBcell_score	CXCL11
Module5_TcellBcell_score	SELL
Module5_TcellBcell_score	SAMSN1
Module5_TcellBcell_score	RTP4
Module5_TcellBcell_score	CLEC7A
Module5_TcellBcell_score	TAP1
Module5_TcellBcell_score	WARS
Module5_TcellBcell_score	PLA2G7
Module5_TcellBcell_score	ZBED2
Module5_TcellBcell_score	NPL
Module5_TcellBcell_score	RUNX3
Module5_TcellBcell_score	VNN2
Module5_TcellBcell_score	CD3G
Module5_TcellBcell_score	IL32
Module5_TcellBcell_score	CD8B
Module5_TcellBcell_score	CD19
Module5_TcellBcell_score	CD86
Module5_TcellBcell_score	AIM2
Module5_TcellBcell_score	CD38
Module5_TcellBcell_score	CYTIP
Module5_TcellBcell_score	LOC96610
Module5_TcellBcell_score	CD69
Module5_TcellBcell_score	CD79A
Module11_Prolif_score	CDKN3
Module11_Prolif_score	NDC80
Module11_Prolif_score	RNASEH2A
Module11_Prolif_score	CENPA
Module11_Prolif_score	SMC2
Module11_Prolif_score	CENPE
Module11_Prolif_score	RAD51AP1
Module11_Prolif_score	PLK4
Module11_Prolif_score	NMU
Module11_Prolif_score	KIF2C
Module11_Prolif_score	TMSB15A
Module11_Prolif_score	UBE2C
Module11_Prolif_score	CHEK1
Module11_Prolif_score	ZWINT
Module11_Prolif_score	OIP5
Module11_Prolif_score	CRABP1
Module11_Prolif_score	ECT2
Module11_Prolif_score	EIF4EBP1
Module11_Prolif_score	EZH2
Module11_Prolif_score	FEN1
Module11_Prolif_score	HSPA4L
Module11_Prolif_score	TPX2
Module11_Prolif_score	FOXM1
Module11_Prolif_score	NCAPH
Module11_Prolif_score	PRAME
Module11_Prolif_score	PDSS1
Module11_Prolif_score	KIF4A
Module11_Prolif_score	RAD54B
Module11_Prolif_score	ASPM
Module11_Prolif_score	FBXO5
Module11_Prolif_score	ATAD2
Module11_Prolif_score	RACGAP1
Module11_Prolif_score	GPSM2
Module11_Prolif_score	DONSON
Module11_Prolif_score	HMMR
Module11_Prolif_score	BIRC5
Module11_Prolif_score	KIF11
Module11_Prolif_score	LMNB1
Module11_Prolif_score	MAD2L1
Module11_Prolif_score	MCM4
Module11_Prolif_score	MCM5
Module11_Prolif_score	MKI67
Module11_Prolif_score	MMP1
Module11_Prolif_score	MYBL1
Module11_Prolif_score	MYBL2
Module11_Prolif_score	NEK2
Module11_Prolif_score	NUSAP1
Module11_Prolif_score	GTSE1
Module11_Prolif_score	GINS2
Module11_Prolif_score	PLK1
Module11_Prolif_score	FAM64A
Module11_Prolif_score	ERCC6L
Module11_Prolif_score	NCAPG2
Module11_Prolif_score	CEP55
Module11_Prolif_score	FANCI
Module11_Prolif_score	HJURP
Module11_Prolif_score	MCM10
Module11_Prolif_score	DEPDC1
Module11_Prolif_score	C1orf112
Module11_Prolif_score	CENPN
Module11_Prolif_score	PBK
Module11_Prolif_score	KIF15
Module11_Prolif_score	CIAPIN1
Module11_Prolif_score	ACTR3B
Module11_Prolif_score	GPR126
Module11_Prolif_score	SPC25
Module11_Prolif_score	RAD21
Module11_Prolif_score	RFC3
Module11_Prolif_score	RFC4
Module11_Prolif_score	RRM2
Module11_Prolif_score	NCAPG
Module11_Prolif_score	STIL
Module11_Prolif_score	SKP2
Module11_Prolif_score	SOX11
Module11_Prolif_score	SQLE
Module11_Prolif_score	AURKA
Module11_Prolif_score	TAF2
Module11_Prolif_score	TARS
Module11_Prolif_score	BUB1B
Module11_Prolif_score	TK1
Module11_Prolif_score	TMPO
Module11_Prolif_score	TOP2A
Module11_Prolif_score	PHLDA2
Module11_Prolif_score	TTK
Module11_Prolif_score	LRP8
Module11_Prolif_score	DSCC1
Module11_Prolif_score	MLF1IP
Module11_Prolif_score	E2F8
Module11_Prolif_score	SHCBP1
Module11_Prolif_score	SLC7A5
Module11_Prolif_score	ANP32E
Module11_Prolif_score	KIF18A
Module11_Prolif_score	CDC7
Module11_Prolif_score	CDC45
Module11_Prolif_score	RAD54L
Module11_Prolif_score	TTF2
Module11_Prolif_score	PIR
Module11_Prolif_score	ACTL6A
Module11_Prolif_score	GGH
Module11_Prolif_score	CCNA2
Module11_Prolif_score	CCNB1
Module11_Prolif_score	PRC1
Module11_Prolif_score	CCNB2
Module11_Prolif_score	CCNE2
Module11_Prolif_score	EXO1
Module11_Prolif_score	AURKB
Module11_Prolif_score	PTTG1
Module11_Prolif_score	TRIP13
Module11_Prolif_score	KIF23
Module11_Prolif_score	APOBEC3B
Module11_Prolif_score	MTFR1
Module11_Prolif_score	ESPL1
Module11_Prolif_score	DLGAP5
Module11_Prolif_score	CDK1
Module11_Prolif_score	MELK
Module11_Prolif_score	GINS1
Module11_Prolif_score	CDC6
Module11_Prolif_score	CDC20
Module11_Prolif_score	NCAPD2
Module11_Prolif_score	KIF14
TAMsurr_score	CXCL10
TAMsurr_score	CXCL11
TAMsurr_score	CCL8
TAMsurr_score	LAMP3
TcClassII_score	CD2
TcClassII_score	CD3G
TcClassII_score	CD8A
TcClassII_score	IFNG
TcClassII_score	TNF
TcClassII_score	GZMB
TcClassII_score	GZMH
TcClassII_score	PRF1
TcClassII_score	ZAP70
TcClassII_score	HLA-DMA
TcClassII_score	HLA-DOA
TcClassII_score	HLA-DOB
TcClassII_score	HLA-DPA1
TcClassII_score	HLA-DPB1
TcClassII_score	HLA-DQA1
TcClassII_score	HLA-DQB1
TcClassII_score	HLA-DQB2
TcClassII_score	HLA-DRA
TcClassII_score	HLA-DRB1
TcClassII_score	HLA-DRB2
TcClassII_score	HLA-DRB3
TcClassII_score	HLA-DRB4
TcClassII_score	HLA-DRB5
TcClassII_score	HLA-DRB6
TcClassII_score	CIITA
TcClassII_score	CD74
TAMsurr_TcClassII_ratio	CXCL10
TAMsurr_TcClassII_ratio	CXCL11
TAMsurr_TcClassII_ratio	CCL8
TAMsurr_TcClassII_ratio	LAMP3
TAMsurr_TcClassII_ratio	CD2
TAMsurr_TcClassII_ratio	CD3G
TAMsurr_TcClassII_ratio	CD8A
TAMsurr_TcClassII_ratio	IFNG
TAMsurr_TcClassII_ratio	TNF
TAMsurr_TcClassII_ratio	GZMB
TAMsurr_TcClassII_ratio	GZMH
TAMsurr_TcClassII_ratio	PRF1
TAMsurr_TcClassII_ratio	ZAP70
TAMsurr_TcClassII_ratio	HLA-DMA
TAMsurr_TcClassII_ratio	HLA-DOA
TAMsurr_TcClassII_ratio	HLA-DOB
TAMsurr_TcClassII_ratio	HLA-DPA1
TAMsurr_TcClassII_ratio	HLA-DPB1
TAMsurr_TcClassII_ratio	HLA-DQA1
TAMsurr_TcClassII_ratio	HLA-DQB1
TAMsurr_TcClassII_ratio	HLA-DQB2
TAMsurr_TcClassII_ratio	HLA-DRA
TAMsurr_TcClassII_ratio	HLA-DRB1
TAMsurr_TcClassII_ratio	HLA-DRB2
TAMsurr_TcClassII_ratio	HLA-DRB3
TAMsurr_TcClassII_ratio	HLA-DRB4
TAMsurr_TcClassII_ratio	HLA-DRB5
TAMsurr_TcClassII_ratio	HLA-DRB6
TAMsurr_TcClassII_ratio	CIITA
TAMsurr_TcClassII_ratio	CD74
IL12_score_21050467	CD3E
IL12_score_21050467	TRB
IL12_score_21050467	IL12B
IL12_score_21050467	CD3Z
IL12_score_21050467	STAT4
IL12_score_21050467	IFNG
IL12_score_21050467	JAK2
IL12_score_21050467	IL12RB1
IL12_score_21050467	IL12RB2
IL12_score_21050467	MAPK14
IL12_score_21050467	TRA
IL12_score_21050467	IL12A
IL12_score_21050467	MAP2K6
IL12_score_21050467	TYK2
IL12_score_21050467	JUN
IL12_score_21050467	IL18
IL12_score_21050467	CXCR3
IL12_score_21050467	CD3G
IL12_score_21050467	ETV5
IL12_score_21050467	CCR5
IL12_score_21050467	CD3D
IL12_score_21050467	MAPK8
IL12_score_21050467	IL18R1
IL4_score_21050467	JAK3
IL4_score_21050467	GRB2
IL4_score_21050467	STAT6
IL4_score_21050467	SHC1
IL4_score_21050467	IL4
IL4_score_21050467	IL4R
IL4_score_21050467	AKT1
IL4_score_21050467	IRS1
IL4_score_21050467	IL2RG
IL4_score_21050467	JAK1
IL4_score_21050467	RPS6KB1
IL2_score_21050467	RAF1
IL2_score_21050467	IL2
IL2_score_21050467	STAT5A
IL2_score_21050467	IL2RB
IL2_score_21050467	SOS1
IL2_score_21050467	GRB2
IL2_score_21050467	STAT5B
IL2_score_21050467	HRAS
IL2_score_21050467	LCK
IL2_score_21050467	JUN
IL2_score_21050467	MAPK3
IL2_score_21050467	IL2RG
IL2_score_21050467	JAK1
IL2_score_21050467	JAK3
IL2_score_21050467	CSNK2A1
IL2_score_21050467	MAP2K1
IL2_score_21050467	FOS
IL2_score_21050467	SHC1
IL2_score_21050467	SYK
IL2_score_21050467	ELK1
IL2_score_21050467	IL2RA
IL2_score_21050467	MAPK8
IL13_score_21050467	IL13
IL13_score_21050467	IL13RA2
IL13_score_21050467	JAK2
IL13_score_21050467	IL13RA1
IL13_score_21050467	TYK2
IL13_score_21050467	IL4R
IL13_score_21050467	JAK1
IFNG_score_21050467	MAP3K10
IFNG_score_21050467	CSRP3
IFNG_score_21050467	FOSL1
IFNG_score_21050467	SKP1A
IFNG_score_21050467	HLA-B
IFNG_score_21050467	SF3A1
IFNG_score_21050467	XRCC6
IFNG_score_21050467	CEBPD
IFNG_score_21050467	HLA-A
IFNG_score_21050467	NMI
IFNG_score_21050467	IFI35
IFNG_score_21050467	HIF3A
IFNG_score_21050467	TAS2R5
IFNG_score_21050467	C1S
IFNG_score_21050467	SHFM1
IFNG_score_21050467	COL16A1
IFNG_score_21050467	PSME1
IFNG_score_21050467	IFITM1
IFNG_score_21050467	CYCS
IFNG_score_21050467	BAK1
IFNG_score_21050467	EPS15
IFNG_score_21050467	GBP1
IFNG_score_21050467	FAS
IFNG_score_21050467	PML
IFNG_score_21050467	HADH
IFNG_score_21050467	EIF2B1
IFNG_score_21050467	HLA-E
IFNG_score_21050467	HADHB
IFNG_score_21050467	IRF1
IFNG_score_21050467	ADAR
IFNG_score_21050467	IFIT3
IFNG_score_21050467	SDCBP
IFNG_score_21050467	ATP6V0B
IFNG_score_21050467	ZFP36L2
IFNG_score_21050467	TRIM21
IFNG_score_21050467	PRAME
IFNG_score_21050467	ELK4
IFNG_score_21050467	BBC3
IFNG_score_21050467	PSMB10
IFNG_score_21050467	CASP8
IFNG_score_21050467	PHLDA1
IFNG_score_21050467	PPP3CA
IFNG_score_21050467	BTG1
IFNG_score_21050467	RBBP4
IFNG_score_21050467	PMAIP1
IFNG_score_21050467	TEAD4
IFNG_score_21050467	SRP9
IFNG_score_21050467	ISG15
IFNG_score_21050467	BST2
IFNG_score_21050467	PYHIN1
IFNG_score_21050467	IL15RA
IFNG_score_21050467	VEGFC
IFNG_score_21050467	RHOC
IFNG_score_21050467	PLOD2
IFNG_score_21050467	NULL
IFNG_score_21050467	STAT1
IFNG_score_21050467	PSMB8
IFNG_score_21050467	SFRS2
IFNG_score_21050467	VAT1
IFNG_score_21050467	PARP1
IFNG_score_21050467	ICAM1
IFNG_score_21050467	TAP1
IFNG_score_21050467	IL6
IFNG_score_21050467	BAG1
TGFB_score_21050467	MMP3
TGFB_score_21050467	MARCKSL1
TGFB_score_21050467	IGF2R
TGFB_score_21050467	LAMB1
TGFB_score_21050467	SPARC
TGFB_score_21050467	FN1
TGFB_score_21050467	ITGA4
TGFB_score_21050467	SMO
TGFB_score_21050467	MMP19
TGFB_score_21050467	ITGB8
TGFB_score_21050467	ITGA5
TGFB_score_21050467	NID1
TGFB_score_21050467	TIMP1
TGFB_score_21050467	SEMA3F
TGFB_score_21050467	RHOQ
TGFB_score_21050467	CTNNB1
TGFB_score_21050467	MMP2
TGFB_score_21050467	SERPINE1
TGFB_score_21050467	EPHB2
TGFB_score_21050467	COL16A1
TGFB_score_21050467	EPHA2
TGFB_score_21050467	TNC
TGFB_score_21050467	JUP
TGFB_score_21050467	ITGA3
TGFB_score_21050467	TCF7L2
TGFB_score_21050467	COL3A1
TGFB_score_21050467	CDH6
TGFB_score_21050467	WNT2B
TGFB_score_21050467	ADAM9
TGFB_score_21050467	DSP
TGFB_score_21050467	HSPG2
TGFB_score_21050467	ARHGAP1
TGFB_score_21050467	ITGB5
TGFB_score_21050467	IGFBP5
TGFB_score_21050467	ARHGDIA
TGFB_score_21050467	LRP1
TGFB_score_21050467	IGFBP2
TGFB_score_21050467	CTNNA1
TGFB_score_21050467	LRRC17
TGFB_score_21050467	MMP14
TGFB_score_21050467	NEO1
TGFB_score_21050467	EFNA5
TGFB_score_21050467	ITGB3
TGFB_score_21050467	EPHB3
TGFB_score_21050467	CD44
TGFB_score_21050467	IGFBP4
TGFB_score_21050467	TNFRSF1A
TGFB_score_21050467	RAC1
TGFB_score_21050467	PXN
TGFB_score_21050467	PLAT
TGFB_score_21050467	COL8A1
TGFB_score_21050467	WNT8B
TGFB_score_21050467	IGFBP3
TGFB_score_21050467	RHOA
TGFB_score_21050467	EPHB4
TGFB_score_21050467	MMP1
TGFB_score_21050467	PAK1
TGFB_score_21050467	MTA1
TGFB_score_21050467	THBS2
TGFB_score_21050467	CSPG2
TGFB_score_21050467	MMP17
TGFB_score_21050467	CD59
TGFB_score_21050467	DVL3
TGFB_score_21050467	RHOB
TGFB_score_21050467	COL6A3
TGFB_score_21050467	NOTCH2
TGFB_score_21050467	BSG
TGFB_score_21050467	MMP11
TGFB_score_21050467	COL1A2
TGFB_score_21050467	ZYX
TGFB_score_21050467	RND3
TGFB_score_21050467	THBS1
TGFB_score_21050467	RHOG
TGFB_score_21050467	ICAM1
TGFB_score_21050467	LAMA4
TGFB_score_21050467	DVL1
TGFB_score_21050467	PAK2
TGFB_score_21050467	ITGB2
TGFB_score_21050467	COL6A1
TGFB_score_21050467	FGD1
TREM1_data	TREM1
DAP12_data	TYROBP
Immune_NSCLC_score	C3orf41
Immune_NSCLC_score	C1orf24
Immune_NSCLC_score	PLEK
Immune_NSCLC_score	RHOH
Immune_NSCLC_score	PSCDBP
Immune_NSCLC_score	TCEA2
Immune_NSCLC_score	FLJ21963
Immune_NSCLC_score	CLEC4E
Immune_NSCLC_score	USP51
Immune_NSCLC_score	WFDC10B
Immune_NSCLC_score	IGH
Immune_NSCLC_score	SLC4A3
Immune_NSCLC_score	CD53
Immune_NSCLC_score	LOC401431
Immune_NSCLC_score	SCFV
Immune_NSCLC_score	THRAP2
Immune_NSCLC_score	PRDM13
Immune_NSCLC_score	OBSL1
Immune_NSCLC_score	C7orf40
Immune_NSCLC_score	TAGAP
Immune_NSCLC_score	MGC11271
Immune_NSCLC_score	IGLV6-57
Immune_NSCLC_score	CD38
Immune_NSCLC_score	FKBP9
Immune_NSCLC_score	ADAMTSL2
Immune_NSCLC_score	CD48
Immune_NSCLC_score	GNPTAB
Immune_NSCLC_score	DHRS8
Immune_NSCLC_score	LOC388886
Immune_NSCLC_score	CNIH3
Immune_NSCLC_score	PSMA6
Immune_NSCLC_score	CCRK
Immune_NSCLC_score	SHROOM1
Immune_NSCLC_score	GPSM1
Immune_NSCLC_score	TRO
Immune_NSCLC_score	GSTT2
Immune_NSCLC_score	NQO2
Immune_NSCLC_score	EAF2
Immune_NSCLC_score	MUM1L1
Immune_NSCLC_score	MUC4
Immune_NSCLC_score	C13orf21
Immune_NSCLC_score	PABPC1
Immune_NSCLC_score	PLA2G7
Immune_NSCLC_score	PARK2
Immune_NSCLC_score	AOAH
Immune_NSCLC_score	IGL
Immune_NSCLC_score	LOC642480
Immune_NSCLC_score	TMSB4X
Immune_NSCLC_score	LOC390712
Immune_NSCLC_score	ACOT8
Immune_NSCLC_score	GIMAP7
Immune_NSCLC_score	LOC375010
Immune_NSCLC_score	ASAH1
Immune_NSCLC_score	TRIM45
Immune_NSCLC_score	C2orf30
Immune_NSCLC_score	EXT2
Immune_NSCLC_score	IFI6
Immune_NSCLC_score	KCNE3
Immune_NSCLC_score	CTSF
Immune_NSCLC_score	SULT1C1
Immune_NSCLC_score	RASL11B
Immune_NSCLC_score	LOC148898
Immune_NSCLC_score	HMGCL
Immune_NSCLC_score	IGHA1
Immune_NSCLC_score	C1QTNF3
Immune_NSCLC_score	C20orf46
Immune_NSCLC_score	IL11RA
Immune_NSCLC_score	ADRA2C
Immune_NSCLC_score	IGKC
Immune_NSCLC_score	CEACAM5
Immune_NSCLC_score	PURB
Immune_NSCLC_score	TPD52
Tcell_receptors_score	CD3D
Tcell_receptors_score	CD3E
Tcell_receptors_score	CD3G
Tcell_receptors_score	CD3Z
CHANG_CORE_SERUM_RESPONSE_UP	CEP78
CHANG_CORE_SERUM_RESPONSE_UP	LSM3
CHANG_CORE_SERUM_RESPONSE_UP	LRRC40
CHANG_CORE_SERUM_RESPONSE_UP	STK17A
CHANG_CORE_SERUM_RESPONSE_UP	RPN1
CHANG_CORE_SERUM_RESPONSE_UP	JUNB
CHANG_CORE_SERUM_RESPONSE_UP	NUP85
CHANG_CORE_SERUM_RESPONSE_UP	FLNC
CHANG_CORE_SERUM_RESPONSE_UP	HMGN2
CHANG_CORE_SERUM_RESPONSE_UP	RPP40
CHANG_CORE_SERUM_RESPONSE_UP	UQCR10
CHANG_CORE_SERUM_RESPONSE_UP	AIMP2
CHANG_CORE_SERUM_RESPONSE_UP	CHEK1
CHANG_CORE_SERUM_RESPONSE_UP	VTA1
CHANG_CORE_SERUM_RESPONSE_UP	EXOSC8
CHANG_CORE_SERUM_RESPONSE_UP	CENPO
CHANG_CORE_SERUM_RESPONSE_UP	PNO1
CHANG_CORE_SERUM_RESPONSE_UP	SLC16A1
CHANG_CORE_SERUM_RESPONSE_UP	WDR77
CHANG_CORE_SERUM_RESPONSE_UP	UBE2J1
CHANG_CORE_SERUM_RESPONSE_UP	NOP16
CHANG_CORE_SERUM_RESPONSE_UP	NUDT1
CHANG_CORE_SERUM_RESPONSE_UP	SMC2
CHANG_CORE_SERUM_RESPONSE_UP	SLC25A5
CHANG_CORE_SERUM_RESPONSE_UP	NUPL1
CHANG_CORE_SERUM_RESPONSE_UP	DLEU2
CHANG_CORE_SERUM_RESPONSE_UP	PDAP1
CHANG_CORE_SERUM_RESPONSE_UP	CCBL2
CHANG_CORE_SERUM_RESPONSE_UP	COX17
CHANG_CORE_SERUM_RESPONSE_UP	BCCIP
CHANG_CORE_SERUM_RESPONSE_UP	PLG
CHANG_CORE_SERUM_RESPONSE_UP	RGS8
CHANG_CORE_SERUM_RESPONSE_UP	SNRPC
CHANG_CORE_SERUM_RESPONSE_UP	PLK4
CHANG_CORE_SERUM_RESPONSE_UP	NUTF2
CHANG_CORE_SERUM_RESPONSE_UP	LSM4
CHANG_CORE_SERUM_RESPONSE_UP	SMS
CHANG_CORE_SERUM_RESPONSE_UP	EBNA1BP2
CHANG_CORE_SERUM_RESPONSE_UP	C13orf27
CHANG_CORE_SERUM_RESPONSE_UP	VDAC1
CHANG_CORE_SERUM_RESPONSE_UP	PSMD14
CHANG_CORE_SERUM_RESPONSE_UP	MYCBP
CHANG_CORE_SERUM_RESPONSE_UP	SMURF2
CHANG_CORE_SERUM_RESPONSE_UP	GNG11
CHANG_CORE_SERUM_RESPONSE_UP	F3
CHANG_CORE_SERUM_RESPONSE_UP	IL7R
CHANG_CORE_SERUM_RESPONSE_UP	BRIP1
CHANG_CORE_SERUM_RESPONSE_UP	HNRNPA2B1
CHANG_CORE_SERUM_RESPONSE_UP	DCK
CHANG_CORE_SERUM_RESPONSE_UP	ALKBH7
CHANG_CORE_SERUM_RESPONSE_UP	HN1L
CHANG_CORE_SERUM_RESPONSE_UP	MSN
CHANG_CORE_SERUM_RESPONSE_UP	TPM1
CHANG_CORE_SERUM_RESPONSE_UP	HYLS1
CHANG_CORE_SERUM_RESPONSE_UP	HAUS1
CHANG_CORE_SERUM_RESPONSE_UP	NUP93
CHANG_CORE_SERUM_RESPONSE_UP	SNRPE
CHANG_CORE_SERUM_RESPONSE_UP	ITGA6
CHANG_CORE_SERUM_RESPONSE_UP	CENPN
CHANG_CORE_SERUM_RESPONSE_UP	C11orf24
CHANG_CORE_SERUM_RESPONSE_UP	GGH
CHANG_CORE_SERUM_RESPONSE_UP	PFKP
CHANG_CORE_SERUM_RESPONSE_UP	FARSA
CHANG_CORE_SERUM_RESPONSE_UP	EIF2AK1
CHANG_CORE_SERUM_RESPONSE_UP	CENPW
CHANG_CORE_SERUM_RESPONSE_UP	TUBA4A
CHANG_CORE_SERUM_RESPONSE_UP	TRA2B
CHANG_CORE_SERUM_RESPONSE_UP	UMPS
CHANG_CORE_SERUM_RESPONSE_UP	MRTO4
CHANG_CORE_SERUM_RESPONSE_UP	NUDT15
CHANG_CORE_SERUM_RESPONSE_UP	PGM2
CHANG_CORE_SERUM_RESPONSE_UP	DBNDD1
CHANG_CORE_SERUM_RESPONSE_UP	SNRPB
CHANG_CORE_SERUM_RESPONSE_UP	MNAT1
CHANG_CORE_SERUM_RESPONSE_UP	NUP35
CHANG_CORE_SERUM_RESPONSE_UP	TCEB1
CHANG_CORE_SERUM_RESPONSE_UP	HSPB11
CHANG_CORE_SERUM_RESPONSE_UP	C19orf48
CHANG_CORE_SERUM_RESPONSE_UP	ID3
CHANG_CORE_SERUM_RESPONSE_UP	IPO4
CHANG_CORE_SERUM_RESPONSE_UP	FARSB
CHANG_CORE_SERUM_RESPONSE_UP	EIF4G1
CHANG_CORE_SERUM_RESPONSE_UP	SKA1
CHANG_CORE_SERUM_RESPONSE_UP	MFSD11
CHANG_CORE_SERUM_RESPONSE_UP	PLAUR
CHANG_CORE_SERUM_RESPONSE_UP	MARVELD2
CHANG_CORE_SERUM_RESPONSE_UP	MCM3
CHANG_CORE_SERUM_RESPONSE_UP	DHFR
CHANG_CORE_SERUM_RESPONSE_UP	RNF41
CHANG_CORE_SERUM_RESPONSE_UP	ID2
CHANG_CORE_SERUM_RESPONSE_UP	H2AFZ
CHANG_CORE_SERUM_RESPONSE_UP	CDK2
CHANG_CORE_SERUM_RESPONSE_UP	NCLN
CHANG_CORE_SERUM_RESPONSE_UP	ZWILCH
CHANG_CORE_SERUM_RESPONSE_UP	DYNLT1
CHANG_CORE_SERUM_RESPONSE_UP	C16orf61
CHANG_CORE_SERUM_RESPONSE_UP	SLC25A40
CHANG_CORE_SERUM_RESPONSE_UP	RHOC
CHANG_CORE_SERUM_RESPONSE_UP	CCT5
CHANG_CORE_SERUM_RESPONSE_UP	PDIA4
CHANG_CORE_SERUM_RESPONSE_UP	SNRPA
CHANG_CORE_SERUM_RESPONSE_UP	RBM14
CHANG_CORE_SERUM_RESPONSE_UP	PDLIM7
CHANG_CORE_SERUM_RESPONSE_UP	PITPNC1
CHANG_CORE_SERUM_RESPONSE_UP	TPM3
CHANG_CORE_SERUM_RESPONSE_UP	CORO1C
CHANG_CORE_SERUM_RESPONSE_UP	ERLIN1
CHANG_CORE_SERUM_RESPONSE_UP	PAICS
CHANG_CORE_SERUM_RESPONSE_UP	TPRKB
CHANG_CORE_SERUM_RESPONSE_UP	SKA2
CHANG_CORE_SERUM_RESPONSE_UP	MYBL1
CHANG_CORE_SERUM_RESPONSE_UP	SH3BP5L
CHANG_CORE_SERUM_RESPONSE_UP	BRCA2
CHANG_CORE_SERUM_RESPONSE_UP	SAR1A
CHANG_CORE_SERUM_RESPONSE_UP	POLR3K
CHANG_CORE_SERUM_RESPONSE_UP	MRPS28
CHANG_CORE_SERUM_RESPONSE_UP	NUP107
CHANG_CORE_SERUM_RESPONSE_UP	TUBG1
CHANG_CORE_SERUM_RESPONSE_UP	PNN
CHANG_CORE_SERUM_RESPONSE_UP	FAM167A
CHANG_CORE_SERUM_RESPONSE_UP	RFC3
CHANG_CORE_SERUM_RESPONSE_UP	MYL6
CHANG_CORE_SERUM_RESPONSE_UP	MCM7
CHANG_CORE_SERUM_RESPONSE_UP	MAGOHB
CHANG_CORE_SERUM_RESPONSE_UP	FAM89B
CHANG_CORE_SERUM_RESPONSE_UP	TOMM40
CHANG_CORE_SERUM_RESPONSE_UP	CDCA4
CHANG_CORE_SERUM_RESPONSE_UP	MT3
CHANG_CORE_SERUM_RESPONSE_UP	MTHFD1
CHANG_CORE_SERUM_RESPONSE_UP	PSMD12
CHANG_CORE_SERUM_RESPONSE_UP	MYBL2
CHANG_CORE_SERUM_RESPONSE_UP	CKLF
CHANG_CORE_SERUM_RESPONSE_UP	NRIP3
CHANG_CORE_SERUM_RESPONSE_UP	EZR
CHANG_CORE_SERUM_RESPONSE_UP	C12orf24
CHANG_CORE_SERUM_RESPONSE_UP	GPLD1
CHANG_CORE_SERUM_RESPONSE_UP	SRM
CHANG_CORE_SERUM_RESPONSE_UP	RAB3B
CHANG_CORE_SERUM_RESPONSE_UP	NLN
CHANG_CORE_SERUM_RESPONSE_UP	MT1F
CHANG_CORE_SERUM_RESPONSE_UP	TNFRSF12A
CHANG_CORE_SERUM_RESPONSE_UP	TPI1
CHANG_CORE_SERUM_RESPONSE_UP	HAS2
CHANG_CORE_SERUM_RESPONSE_UP	APOO
CHANG_CORE_SERUM_RESPONSE_UP	FBXO41
CHANG_CORE_SERUM_RESPONSE_UP	MRPL37
CHANG_CORE_SERUM_RESPONSE_UP	GSTCD
CHANG_CORE_SERUM_RESPONSE_UP	SDC1
CHANG_CORE_SERUM_RESPONSE_UP	WDR54
CHANG_CORE_SERUM_RESPONSE_UP	RNF138
CHANG_CORE_SERUM_RESPONSE_UP	APITD1
CHANG_CORE_SERUM_RESPONSE_UP	RMND5B
CHANG_CORE_SERUM_RESPONSE_UP	ENO1
CHANG_CORE_SERUM_RESPONSE_UP	MAP3K8
CHANG_CORE_SERUM_RESPONSE_UP	TMEM130
CHANG_CORE_SERUM_RESPONSE_UP	SNX17
CHANG_CORE_SERUM_RESPONSE_UP	KRR1
CHANG_CORE_SERUM_RESPONSE_UP	TAGLN
CHANG_CORE_SERUM_RESPONSE_UP	PA2G4
CHANG_CORE_SERUM_RESPONSE_UP	RUVBL1
CHANG_CORE_SERUM_RESPONSE_UP	SNRPD1
CHANG_CORE_SERUM_RESPONSE_UP	LOXL2
CHANG_CORE_SERUM_RESPONSE_UP	POLE2
CHANG_CORE_SERUM_RESPONSE_UP	MAPRE1
CHANG_CORE_SERUM_RESPONSE_UP	IMP4
CHANG_CORE_SERUM_RESPONSE_UP	EMP2
CHANG_CORE_SERUM_RESPONSE_UP	PSMD2
CHANG_CORE_SERUM_RESPONSE_UP	MET
CHANG_CORE_SERUM_RESPONSE_UP	IFRD2
CHANG_CORE_SERUM_RESPONSE_UP	LMNB2
CHANG_CORE_SERUM_RESPONSE_UP	PLOD2
CHANG_CORE_SERUM_RESPONSE_UP	NCEH1
CHANG_CORE_SERUM_RESPONSE_UP	NME1
CHANG_CORE_SERUM_RESPONSE_UP	STRA13
CHANG_CORE_SERUM_RESPONSE_UP	ACTL6A
CHANG_CORE_SERUM_RESPONSE_UP	DLEU1
CHANG_CORE_SERUM_RESPONSE_UP	SNRPA1
CHANG_CORE_SERUM_RESPONSE_UP	CBX1
CHANG_CORE_SERUM_RESPONSE_UP	LYAR
CHANG_CORE_SERUM_RESPONSE_UP	PTPLB
CHANG_CORE_SERUM_RESPONSE_UP	PFN1
CHANG_CORE_SERUM_RESPONSE_UP	CENPJ
CHANG_CORE_SERUM_RESPONSE_UP	COTL1
CHANG_CORE_SERUM_RESPONSE_UP	SPRYD7
CHANG_CORE_SERUM_RESPONSE_UP	USPL1
CHANG_CORE_SERUM_RESPONSE_UP	MRPL12
CHANG_CORE_SERUM_RESPONSE_UP	ADAMTS1
CHANG_CORE_SERUM_RESPONSE_UP	GLRX3
CHANG_CORE_SERUM_RESPONSE_UP	WSB2
CHANG_CORE_SERUM_RESPONSE_UP	MRPS16
CHANG_CORE_SERUM_RESPONSE_UP	DCLRE1B
CHANG_CORE_SERUM_RESPONSE_UP	MKKS
CHANG_CORE_SERUM_RESPONSE_UP	C3orf26
CHANG_CORE_SERUM_RESPONSE_UP	CPEB4
CHANG_CORE_SERUM_RESPONSE_UP	SPAG17
CHANG_CORE_SERUM_RESPONSE_UP	MLF1IP
CHANG_CORE_SERUM_RESPONSE_UP	UAP1
CHANG_CORE_SERUM_RESPONSE_UP	COQ2
CHANG_CORE_SERUM_RESPONSE_UP	WDHD1
CHANG_CORE_SERUM_RESPONSE_UP	DCBLD2
CHANG_CORE_SERUM_RESPONSE_UP	KIAA0090
CHANG_CORE_SERUM_RESPONSE_UP	SAR1B
CHANG_CORE_SERUM_RESPONSE_UP	PSMA7
CHANG_CORE_SERUM_RESPONSE_UP	PSMC3
CHANG_CORE_SERUM_RESPONSE_UP	COPS6
CHANG_CORE_SERUM_RESPONSE_UP	DUT
CHANG_CORE_SERUM_RESPONSE_UP	PPIH
CHANG_CORE_SERUM_RESPONSE_UP	PHF19
CHANG_CORE_SERUM_RESPONSE_UP	TPM2
CHANG_CORE_SERUM_RESPONSE_UP	MCTS1
CHANG_CORE_SERUM_RESPONSE_UP	EIF4EBP1
CHANG_CORE_SERUM_RESPONSE_UP	HNRNPR
CSR_Activated_15701700	ACAS2
CSR_Activated_15701700	ACINUS
CSR_Activated_15701700	ADAMTS1
CSR_Activated_15701700	ADD3
CSR_Activated_15701700	AIP1
CSR_Activated_15701700	ALEX3
CSR_Activated_15701700	APOD
CSR_Activated_15701700	APP
CSR_Activated_15701700	ARHC
CSR_Activated_15701700	ARHGAP12
CSR_Activated_15701700	ARHGEF3
CSR_Activated_15701700	ATP6V0A1
CSR_Activated_15701700	AXIN2
CSR_Activated_15701700	BAF53A
CSR_Activated_15701700	BBC3
CSR_Activated_15701700	BCCIP
CSR_Activated_15701700	BCL6
CSR_Activated_15701700	BF
CSR_Activated_15701700	BHC80
CSR_Activated_15701700	BHLHB2
CSR_Activated_15701700	BM039
CSR_Activated_15701700	BOCT
CSR_Activated_15701700	BRCA2
CSR_Activated_15701700	BRIP1
CSR_Activated_15701700	C11ORF14
CSR_Activated_15701700	C11ORF24
CSR_Activated_15701700	C13ORF1
CSR_Activated_15701700	C1ORF33
CSR_Activated_15701700	C1S
CSR_Activated_15701700	C20ORF108
CSR_Activated_15701700	C5ORF4
CSR_Activated_15701700	C6ORF55
CSR_Activated_15701700	C8ORF13
CSR_Activated_15701700	CAMLG
CSR_Activated_15701700	CBX1
CSR_Activated_15701700	CCNG2
CSR_Activated_15701700	CCNL2
CSR_Activated_15701700	CCT5
CSR_Activated_15701700	CDC14B
CSR_Activated_15701700	CDCA4
CSR_Activated_15701700	CDK2
CSR_Activated_15701700	CDKN1A
CSR_Activated_15701700	CDKN1C
CSR_Activated_15701700	CENPJ
CSR_Activated_15701700	CGI-121
CSR_Activated_15701700	CHEK1
CSR_Activated_15701700	CKLF
CSR_Activated_15701700	CL640
CSR_Activated_15701700	CLCN6
CSR_Activated_15701700	CLIC2
CSR_Activated_15701700	CNTNAP1
CSR_Activated_15701700	COPS6
CSR_Activated_15701700	CORO1C
CSR_Activated_15701700	COTL1
CSR_Activated_15701700	COX17
CSR_Activated_15701700	CPR8
CSR_Activated_15701700	CRTAP
CSR_Activated_15701700	CSF1
CSR_Activated_15701700	CST3
CSR_Activated_15701700	CTNS
CSR_Activated_15701700	CTSF
CSR_Activated_15701700	CYP27A1
CSR_Activated_15701700	DC13
CSR_Activated_15701700	DCK
CSR_Activated_15701700	DCLRE1B
CSR_Activated_15701700	DEPP
CSR_Activated_15701700	DHFR
CSR_Activated_15701700	DHRS6
CSR_Activated_15701700	DKFZP434B103
CSR_Activated_15701700	DKFZP434L142
CSR_Activated_15701700	DKFZP434O1427
CSR_Activated_15701700	DKFZP586A0522
CSR_Activated_15701700	DKFZP727G051
CSR_Activated_15701700	DKFZP761L1417
CSR_Activated_15701700	DKFZP762H185
CSR_Activated_15701700	DLEU1
CSR_Activated_15701700	DLEU2
CSR_Activated_15701700	DNM1
CSR_Activated_15701700	DPP7
CSR_Activated_15701700	DPYSL2
CSR_Activated_15701700	DUSP22
CSR_Activated_15701700	DUT
CSR_Activated_15701700	EBNA1BP2
CSR_Activated_15701700	EEF1E1
CSR_Activated_15701700	EIF4EBP1
CSR_Activated_15701700	EIF4G1
CSR_Activated_15701700	EMP2
CSR_Activated_15701700	ENIGMA
CSR_Activated_15701700	ENO1
CSR_Activated_15701700	EPHB1
CSR_Activated_15701700	ERP70
CSR_Activated_15701700	ESDN
CSR_Activated_15701700	F10
CSR_Activated_15701700	F3
CSR_Activated_15701700	FABP3
CSR_Activated_15701700	FACL3
CSR_Activated_15701700	FADS1
CSR_Activated_15701700	FADS2
CSR_Activated_15701700	FARSL
CSR_Activated_15701700	FCGRT
CSR_Activated_15701700	FDPS
CSR_Activated_15701700	FLJ10036
CSR_Activated_15701700	FLJ10292
CSR_Activated_15701700	FLJ10407
CSR_Activated_15701700	FLJ10618
CSR_Activated_15701700	FLJ10849
CSR_Activated_15701700	FLJ10948
CSR_Activated_15701700	FLJ10983
CSR_Activated_15701700	FLJ11286
CSR_Activated_15701700	FLJ12643
CSR_Activated_15701700	FLJ12953
CSR_Activated_15701700	FLJ14525
CSR_Activated_15701700	FLJ20059
CSR_Activated_15701700	FLJ20154
CSR_Activated_15701700	FLJ20331
CSR_Activated_15701700	FLJ21016
CSR_Activated_15701700	FLJ21986
CSR_Activated_15701700	FLJ23462
CSR_Activated_15701700	FLJ23468
CSR_Activated_15701700	FLJ30532
CSR_Activated_15701700	FLJ30574
CSR_Activated_15701700	FLJ31033
CSR_Activated_15701700	FLJ32731
CSR_Activated_15701700	FLJ32915
CSR_Activated_15701700	FLJ90754
CSR_Activated_15701700	FLJ90798
CSR_Activated_15701700	FLNC
CSR_Activated_15701700	FRSB
CSR_Activated_15701700	FYCO1
CSR_Activated_15701700	GABARAPL1
CSR_Activated_15701700	GABBR1
CSR_Activated_15701700	GATM
CSR_Activated_15701700	GG2-1
CSR_Activated_15701700	GGH
CSR_Activated_15701700	GLS
CSR_Activated_15701700	GNG11
CSR_Activated_15701700	GPLD1
CSR_Activated_15701700	GPR124
CSR_Activated_15701700	GSN
CSR_Activated_15701700	H2AFZ
CSR_Activated_15701700	H2AV
CSR_Activated_15701700	HAS2
CSR_Activated_15701700	HDAC5
CSR_Activated_15701700	HECA
CSR_Activated_15701700	HMGB1
CSR_Activated_15701700	HMGCS1
CSR_Activated_15701700	HMGN2
CSR_Activated_15701700	HN1L
CSR_Activated_15701700	HNRPA2B1
CSR_Activated_15701700	HNRPR
CSR_Activated_15701700	HRB2
CSR_Activated_15701700	HRI
CSR_Activated_15701700	HSPC111
CSR_Activated_15701700	HSU79274
CSR_Activated_15701700	ID2
CSR_Activated_15701700	ID3
CSR_Activated_15701700	IDI1
CSR_Activated_15701700	IFRD2
CSR_Activated_15701700	IGBP1
CSR_Activated_15701700	IL1R1
CSR_Activated_15701700	IL6ST
CSR_Activated_15701700	IL7R
CSR_Activated_15701700	IMP4
CSR_Activated_15701700	INSIG1
CSR_Activated_15701700	IPO4
CSR_Activated_15701700	ITGA6
CSR_Activated_15701700	ITPKB
CSR_Activated_15701700	JAG1
CSR_Activated_15701700	JTV1
CSR_Activated_15701700	KAI1
CSR_Activated_15701700	KEO4
CSR_Activated_15701700	KIAA0090
CSR_Activated_15701700	KIAA0095
CSR_Activated_15701700	KIAA0323
CSR_Activated_15701700	KIAA0342
CSR_Activated_15701700	KIAA0367
CSR_Activated_15701700	KIAA0874
CSR_Activated_15701700	KIAA1036
CSR_Activated_15701700	KIAA1109
CSR_Activated_15701700	KIAA1228
CSR_Activated_15701700	KIAA1268
CSR_Activated_15701700	KIAA1305
CSR_Activated_15701700	KIAA1363
CSR_Activated_15701700	KIAA1536
CSR_Activated_15701700	KIAA1554
CSR_Activated_15701700	KIAA1720
CSR_Activated_15701700	KIAA1946
CSR_Activated_15701700	KIT
CSR_Activated_15701700	KLHL5
CSR_Activated_15701700	LDB1
CSR_Activated_15701700	LDLR
CSR_Activated_15701700	LIPA
CSR_Activated_15701700	LMNB2
CSR_Activated_15701700	LOC115106
CSR_Activated_15701700	LOC115294
CSR_Activated_15701700	LOC129401
CSR_Activated_15701700	LOC153222
CSR_Activated_15701700	LOC169611
CSR_Activated_15701700	LOC201562
CSR_Activated_15701700	LOC201895
CSR_Activated_15701700	LOC221810
CSR_Activated_15701700	LOC253263
CSR_Activated_15701700	LOC284018
CSR_Activated_15701700	LOC284436
CSR_Activated_15701700	LOC285362
CSR_Activated_15701700	LOC339924
CSR_Activated_15701700	LOC51128
CSR_Activated_15701700	LOC51279
CSR_Activated_15701700	LOC51668
CSR_Activated_15701700	LOC56757
CSR_Activated_15701700	LOC56902
CSR_Activated_15701700	LOC56926
CSR_Activated_15701700	LOC93081
CSR_Activated_15701700	LOXL2
CSR_Activated_15701700	LPIN1
CSR_Activated_15701700	LRIG2
CSR_Activated_15701700	LRP1
CSR_Activated_15701700	LSM3
CSR_Activated_15701700	LSM4
CSR_Activated_15701700	LSS
CSR_Activated_15701700	LUM
CSR_Activated_15701700	LYAR
CSR_Activated_15701700	MAF
CSR_Activated_15701700	MAN1A1
CSR_Activated_15701700	MAP3K8
CSR_Activated_15701700	MAPRE1
CSR_Activated_15701700	MBP
CSR_Activated_15701700	MCM3
CSR_Activated_15701700	MCM7
CSR_Activated_15701700	MCP
CSR_Activated_15701700	MCT-1
CSR_Activated_15701700	MEF2D
CSR_Activated_15701700	MEP50
CSR_Activated_15701700	MET
CSR_Activated_15701700	MFGE8
CSR_Activated_15701700	MGC10200
CSR_Activated_15701700	MGC10500
CSR_Activated_15701700	MGC10974
CSR_Activated_15701700	MGC11266
CSR_Activated_15701700	MGC13047
CSR_Activated_15701700	MGC13170
CSR_Activated_15701700	MGC14480
CSR_Activated_15701700	MGC15429
CSR_Activated_15701700	MGC17330
CSR_Activated_15701700	MGC3101
CSR_Activated_15701700	MGC39820
CSR_Activated_15701700	MGC4170
CSR_Activated_15701700	MGC4308
CSR_Activated_15701700	MGC4825
CSR_Activated_15701700	MIG-6
CSR_Activated_15701700	MKKS
CSR_Activated_15701700	MNAT1
CSR_Activated_15701700	MRF2
CSR_Activated_15701700	MRPL12
CSR_Activated_15701700	MRPL37
CSR_Activated_15701700	MRPS16
CSR_Activated_15701700	MRPS28
CSR_Activated_15701700	MSN
CSR_Activated_15701700	MT1F
CSR_Activated_15701700	MT3
CSR_Activated_15701700	MTH2
CSR_Activated_15701700	MTHFD1
CSR_Activated_15701700	MVD
CSR_Activated_15701700	MXI1
CSR_Activated_15701700	MYBL1
CSR_Activated_15701700	MYBL2
CSR_Activated_15701700	MYCBP
CSR_Activated_15701700	MYL6
CSR_Activated_15701700	NCOA3
CSR_Activated_15701700	NIFU
CSR_Activated_15701700	NLN
CSR_Activated_15701700	NME1
CSR_Activated_15701700	NOLA2
CSR_Activated_15701700	NUDT1
CSR_Activated_15701700	NUP107
CSR_Activated_15701700	NUPL1
CSR_Activated_15701700	NUTF2
CSR_Activated_15701700	OIP2
CSR_Activated_15701700	OSBPL8
CSR_Activated_15701700	P8
CSR_Activated_15701700	PA26
CSR_Activated_15701700	PA2G4
CSR_Activated_15701700	PAICS
CSR_Activated_15701700	PBXIP1
CSR_Activated_15701700	PCNT1
CSR_Activated_15701700	PCSK7
CSR_Activated_15701700	PDAP1
CSR_Activated_15701700	PDK2
CSR_Activated_15701700	PFKP
CSR_Activated_15701700	PFN1
CSR_Activated_15701700	PGCP
CSR_Activated_15701700	PHACS
CSR_Activated_15701700	PITPNC1
CSR_Activated_15701700	PKIG
CSR_Activated_15701700	PLA2R1
CSR_Activated_15701700	PLAUR
CSR_Activated_15701700	PLD3
CSR_Activated_15701700	PLG
CSR_Activated_15701700	PLOD2
CSR_Activated_15701700	PLU-1
CSR_Activated_15701700	PLXNB1
CSR_Activated_15701700	PNN
CSR_Activated_15701700	POLE2
CSR_Activated_15701700	POLR3K
CSR_Activated_15701700	POR
CSR_Activated_15701700	PPIH
CSR_Activated_15701700	PROL2
CSR_Activated_15701700	PSMA7
CSR_Activated_15701700	PSMC3
CSR_Activated_15701700	PSMD12
CSR_Activated_15701700	PSMD14
CSR_Activated_15701700	PSMD2
CSR_Activated_15701700	PTPRU
CSR_Activated_15701700	PTS
CSR_Activated_15701700	RAB11-FIP2
CSR_Activated_15701700	RARRES3
CSR_Activated_15701700	RBM14
CSR_Activated_15701700	RBMX
CSR_Activated_15701700	REV3L
CSR_Activated_15701700	RFC3
CSR_Activated_15701700	RNASEH2A
CSR_Activated_15701700	RNASEP1
CSR_Activated_15701700	RNF138
CSR_Activated_15701700	RNF41
CSR_Activated_15701700	RPN1
CSR_Activated_15701700	RRM2B
CSR_Activated_15701700	RUVBL1
CSR_Activated_15701700	SATB1
CSR_Activated_15701700	SBP1
CSR_Activated_15701700	SC4MOL
CSR_Activated_15701700	SCD
CSR_Activated_15701700	SDC1
CSR_Activated_15701700	SDFR1
CSR_Activated_15701700	SELENBP1
CSR_Activated_15701700	SEMACAP3
CSR_Activated_15701700	SERPING1
CSR_Activated_15701700	SES2
CSR_Activated_15701700	SFRS10
CSR_Activated_15701700	SFRS2
CSR_Activated_15701700	SFTPB
CSR_Activated_15701700	SLC16A1
CSR_Activated_15701700	SLC25A5
CSR_Activated_15701700	SLC35E2
CSR_Activated_15701700	SLC40A1
CSR_Activated_15701700	SLC5A3
CSR_Activated_15701700	SLPI
CSR_Activated_15701700	SMC2L1
CSR_Activated_15701700	SMS
CSR_Activated_15701700	SMURF2
CSR_Activated_15701700	SNRP70
CSR_Activated_15701700	SNRPA
CSR_Activated_15701700	SNRPA1
CSR_Activated_15701700	SNRPB
CSR_Activated_15701700	SNRPC
CSR_Activated_15701700	SNRPD1
CSR_Activated_15701700	SNRPE
CSR_Activated_15701700	SQLE
CSR_Activated_15701700	SQRDL
CSR_Activated_15701700	SRM
CSR_Activated_15701700	SSR3
CSR_Activated_15701700	SSSCA1
CSR_Activated_15701700	STK17A
CSR_Activated_15701700	STK18
CSR_Activated_15701700	SVIL
CSR_Activated_15701700	TAGLN
CSR_Activated_15701700	TBRG1
CSR_Activated_15701700	TCEB1
CSR_Activated_15701700	TCTEL1
CSR_Activated_15701700	TFPI2
CSR_Activated_15701700	TIM50L
CSR_Activated_15701700	TIMP2
CSR_Activated_15701700	TNFAIP2
CSR_Activated_15701700	TNFRSF12A
CSR_Activated_15701700	TNFSF12
CSR_Activated_15701700	TNXB
CSR_Activated_15701700	TOMM40
CSR_Activated_15701700	TP53INP1
CSR_Activated_15701700	TPI1
CSR_Activated_15701700	TPM1
CSR_Activated_15701700	TPM2
CSR_Activated_15701700	TRIM22
CSR_Activated_15701700	TSC22
CSR_Activated_15701700	TUBA1
CSR_Activated_15701700	TUBG1
CSR_Activated_15701700	TXNL2
CSR_Activated_15701700	UAP1
CSR_Activated_15701700	UBE2J1
CSR_Activated_15701700	UMPK
CSR_Activated_15701700	UMPS
CSR_Activated_15701700	VAMP4
CSR_Activated_15701700	VDAC1
CSR_Activated_15701700	VIL2
CSR_Activated_15701700	WBP2
CSR_Activated_15701700	WDHD1
CSR_Activated_15701700	WSB1
CSR_Activated_15701700	WSB2
CSR_Activated_15701700	WTAP
CSR_Activated_15701700	ZFP106
CSR_Activated_15701700	ZNF151
CSR_Activated_15701700	ZNF219
CSR_Activated_15701700	ZNF36
CSR_Activated_15701700	ZNF83
KEGG_HEMATOPOIETIC_CELL_LINEAGE	ANPEP
KEGG_HEMATOPOIETIC_CELL_LINEAGE	CD14
KEGG_HEMATOPOIETIC_CELL_LINEAGE	CD19
KEGG_HEMATOPOIETIC_CELL_LINEAGE	CD1A
KEGG_HEMATOPOIETIC_CELL_LINEAGE	CD1B
KEGG_HEMATOPOIETIC_CELL_LINEAGE	CD1C
KEGG_HEMATOPOIETIC_CELL_LINEAGE	CD1D
KEGG_HEMATOPOIETIC_CELL_LINEAGE	CD1E
KEGG_HEMATOPOIETIC_CELL_LINEAGE	CD2
KEGG_HEMATOPOIETIC_CELL_LINEAGE	CD22
KEGG_HEMATOPOIETIC_CELL_LINEAGE	CD33
KEGG_HEMATOPOIETIC_CELL_LINEAGE	CD34
KEGG_HEMATOPOIETIC_CELL_LINEAGE	CD36
KEGG_HEMATOPOIETIC_CELL_LINEAGE	CD37
KEGG_HEMATOPOIETIC_CELL_LINEAGE	CD38
KEGG_HEMATOPOIETIC_CELL_LINEAGE	CD3D
KEGG_HEMATOPOIETIC_CELL_LINEAGE	CD3E
KEGG_HEMATOPOIETIC_CELL_LINEAGE	CD3G
KEGG_HEMATOPOIETIC_CELL_LINEAGE	CD4
KEGG_HEMATOPOIETIC_CELL_LINEAGE	CD44
KEGG_HEMATOPOIETIC_CELL_LINEAGE	CD5
KEGG_HEMATOPOIETIC_CELL_LINEAGE	CD55
KEGG_HEMATOPOIETIC_CELL_LINEAGE	CD59
KEGG_HEMATOPOIETIC_CELL_LINEAGE	CD7
KEGG_HEMATOPOIETIC_CELL_LINEAGE	CD8A
KEGG_HEMATOPOIETIC_CELL_LINEAGE	CD8B
KEGG_HEMATOPOIETIC_CELL_LINEAGE	CD9
KEGG_HEMATOPOIETIC_CELL_LINEAGE	CR1
KEGG_HEMATOPOIETIC_CELL_LINEAGE	CR2
KEGG_HEMATOPOIETIC_CELL_LINEAGE	CSF1
KEGG_HEMATOPOIETIC_CELL_LINEAGE	CSF1R
KEGG_HEMATOPOIETIC_CELL_LINEAGE	CSF2
KEGG_HEMATOPOIETIC_CELL_LINEAGE	CSF2RA
KEGG_HEMATOPOIETIC_CELL_LINEAGE	CSF3
KEGG_HEMATOPOIETIC_CELL_LINEAGE	CSF3R
KEGG_HEMATOPOIETIC_CELL_LINEAGE	DNTT
KEGG_HEMATOPOIETIC_CELL_LINEAGE	EPO
KEGG_HEMATOPOIETIC_CELL_LINEAGE	EPOR
KEGG_HEMATOPOIETIC_CELL_LINEAGE	FCER2
KEGG_HEMATOPOIETIC_CELL_LINEAGE	FCGR1A
KEGG_HEMATOPOIETIC_CELL_LINEAGE	FLT3
KEGG_HEMATOPOIETIC_CELL_LINEAGE	FLT3LG
KEGG_HEMATOPOIETIC_CELL_LINEAGE	GP1BA
KEGG_HEMATOPOIETIC_CELL_LINEAGE	GP1BB
KEGG_HEMATOPOIETIC_CELL_LINEAGE	GP5
KEGG_HEMATOPOIETIC_CELL_LINEAGE	GP9
KEGG_HEMATOPOIETIC_CELL_LINEAGE	GYPA
KEGG_HEMATOPOIETIC_CELL_LINEAGE	HLA-DRA
KEGG_HEMATOPOIETIC_CELL_LINEAGE	HLA-DRB1
KEGG_HEMATOPOIETIC_CELL_LINEAGE	HLA-DRB3
KEGG_HEMATOPOIETIC_CELL_LINEAGE	HLA-DRB4
KEGG_HEMATOPOIETIC_CELL_LINEAGE	HLA-DRB5
KEGG_HEMATOPOIETIC_CELL_LINEAGE	IL11
KEGG_HEMATOPOIETIC_CELL_LINEAGE	IL11RA
KEGG_HEMATOPOIETIC_CELL_LINEAGE	IL1A
KEGG_HEMATOPOIETIC_CELL_LINEAGE	IL1B
KEGG_HEMATOPOIETIC_CELL_LINEAGE	IL1R1
KEGG_HEMATOPOIETIC_CELL_LINEAGE	IL1R2
KEGG_HEMATOPOIETIC_CELL_LINEAGE	IL2RA
KEGG_HEMATOPOIETIC_CELL_LINEAGE	IL3
KEGG_HEMATOPOIETIC_CELL_LINEAGE	IL3RA
KEGG_HEMATOPOIETIC_CELL_LINEAGE	IL4
KEGG_HEMATOPOIETIC_CELL_LINEAGE	IL4R
KEGG_HEMATOPOIETIC_CELL_LINEAGE	IL5
KEGG_HEMATOPOIETIC_CELL_LINEAGE	IL5RA
KEGG_HEMATOPOIETIC_CELL_LINEAGE	IL6
KEGG_HEMATOPOIETIC_CELL_LINEAGE	IL6R
KEGG_HEMATOPOIETIC_CELL_LINEAGE	IL7
KEGG_HEMATOPOIETIC_CELL_LINEAGE	IL7R
KEGG_HEMATOPOIETIC_CELL_LINEAGE	IL9R
KEGG_HEMATOPOIETIC_CELL_LINEAGE	ITGA1
KEGG_HEMATOPOIETIC_CELL_LINEAGE	ITGA2
KEGG_HEMATOPOIETIC_CELL_LINEAGE	ITGA2B
KEGG_HEMATOPOIETIC_CELL_LINEAGE	ITGA3
KEGG_HEMATOPOIETIC_CELL_LINEAGE	ITGA4
KEGG_HEMATOPOIETIC_CELL_LINEAGE	ITGA5
KEGG_HEMATOPOIETIC_CELL_LINEAGE	ITGA6
KEGG_HEMATOPOIETIC_CELL_LINEAGE	ITGAM
KEGG_HEMATOPOIETIC_CELL_LINEAGE	ITGB3
KEGG_HEMATOPOIETIC_CELL_LINEAGE	KIT
KEGG_HEMATOPOIETIC_CELL_LINEAGE	KITLG
KEGG_HEMATOPOIETIC_CELL_LINEAGE	MME
KEGG_HEMATOPOIETIC_CELL_LINEAGE	MS4A1
KEGG_HEMATOPOIETIC_CELL_LINEAGE	TFRC
KEGG_HEMATOPOIETIC_CELL_LINEAGE	THPO
KEGG_HEMATOPOIETIC_CELL_LINEAGE	TNF
KEGG_HEMATOPOIETIC_CELL_LINEAGE	TPO
GP11_Immune_IFN	Minterferon_Cluster_21214954
GP11_Immune_IFN	ZHANG_INTERFERON_RESPONSE
IgG_19272155	LOC96610
IgG_19272155	IGKV1OR2-118
IgG_19272155	IGKV1D-13
IgG_19272155	IGLL3P
IgG_19272155	IGKV1-5
IgG_19272155	IGHV1-69
IgG_19272155	POU2AF1
IgG_19272155	IGLJ3
IgG_19272155	GUSBP11
IgG_19272155	IGLC2
IgG_19272155	IGLV3-25
IgG_19272155	IGKC
IgG_19272155	IGLV2-14
IgG_19272155	IGHG1
IgG_19272155	IGHM
IgG_19272155	IGLV4-3
IgG_19272155	IGHD
IgG_19272155	IGHA1
IgG_19272155	IGL
IgG_19272155	IGH
IgG_19272155	IGLC1
Interferon_19272155	RSAD2
Interferon_19272155	OAS3
Interferon_19272155	IFI44
Interferon_19272155	ISG15
Interferon_19272155	DDX60
Interferon_19272155	IFI44L
Interferon_19272155	IFI6
Interferon_19272155	MX1
Interferon_19272155	IFIT3
Interferon_19272155	IFI27
Interferon_19272155	IFIT1
Interferon_19272155	OAS1
Interferon_19272155	OAS2
LCK_19272155	ARHGAP15
LCK_19272155	KLRK1
LCK_19272155	SASH3
LCK_19272155	ARHGAP25
LCK_19272155	SLAMF1
LCK_19272155	GIMAP5
LCK_19272155	SH2D1A
LCK_19272155	CCR7
LCK_19272155	ITK
LCK_19272155	TRBV19
LCK_19272155	RAC2
LCK_19272155	CORO1A
LCK_19272155	PIK3CD
LCK_19272155	LPXN
LCK_19272155	PRKCB
LCK_19272155	STAT4
LCK_19272155	GMFG
LCK_19272155	SELPLG
LCK_19272155	FGL2
LCK_19272155	EVI2B
LCK_19272155	CSF2RB
LCK_19272155	GZMK
LCK_19272155	SAMSN1
LCK_19272155	GIMAP4
LCK_19272155	IRF8
LCK_19272155	NCKAP1L
LCK_19272155	IL10RA
LCK_19272155	TRAC
LCK_19272155	INPP5D
LCK_19272155	PLAC8
LCK_19272155	CCL5
LCK_19272155	CD247
LCK_19272155	LTB
LCK_19272155	IL2RG
LCK_19272155	HCLS1
LCK_19272155	IL7R
LCK_19272155	CD53
LCK_19272155	LCK
LCK_19272155	CD3D
LCK_19272155	CD27
LCK_19272155	GZMA
LCK_19272155	SELL
LCK_19272155	TRBV21-1
LCK_19272155	CD2
LCK_19272155	CD48
LCK_19272155	SLA
LCK_19272155	LCP2
LCK_19272155	SRGN
LCK_19272155	PTPRC
MHC.I_19272155	HLA-G
MHC.I_19272155	HLA-A
MHC.I_19272155	HLA-B
MHC.I_19272155	HLA-C
MHC.I_19272155	HLA-F
MHC.II_19272155	CTSS
MHC.II_19272155	CD74
MHC.II_19272155	HLA-DRB1
MHC.II_19272155	HLA-DQA1
MHC.II_19272155	HLA-DMB
MHC.II_19272155	HLA-DPA1
MHC.II_19272155	HLA-DPB1
MHC.II_19272155	HLA-DMA
MHC.II_19272155	HLA-DRA
MHC.II_19272155	LCP2
MHC.II_19272155	SRGN
MHC.II_19272155	PTPRC
STAT1_19272155	TAP1
STAT1_19272155	GBP1
STAT1_19272155	IFIH1
STAT1_19272155	PSMB9
STAT1_19272155	CXCL9
STAT1_19272155	IRF1
STAT1_19272155	CXCL11
STAT1_19272155	CXCL10
STAT1_19272155	IDO1
STAT1_19272155	STAT1
Troester_WoundSig_19887484	ADH1A
Troester_WoundSig_19887484	APOH
Troester_WoundSig_19887484	BMPR1B
Troester_WoundSig_19887484	DST
Troester_WoundSig_19887484	CAPN6
Troester_WoundSig_19887484	CD86
Troester_WoundSig_19887484	CDK4
Troester_WoundSig_19887484	COL17A1
Troester_WoundSig_19887484	COX7B
Troester_WoundSig_19887484	CSF3
Troester_WoundSig_19887484	CTGF
Troester_WoundSig_19887484	CTSK
Troester_WoundSig_19887484	DMBT1
Troester_WoundSig_19887484	ARID3A
Troester_WoundSig_19887484	DSC3
Troester_WoundSig_19887484	ELANE
Troester_WoundSig_19887484	EYA4
Troester_WoundSig_19887484	F3
Troester_WoundSig_19887484	FABP4
Troester_WoundSig_19887484	FAP
Troester_WoundSig_19887484	FBLN1
Troester_WoundSig_19887484	EFEMP1
Troester_WoundSig_19887484	FPR1
Troester_WoundSig_19887484	FRZB
Troester_WoundSig_19887484	GJB5
Troester_WoundSig_19887484	HBB
Troester_WoundSig_19887484	HDC
Troester_WoundSig_19887484	HMGA1
Troester_WoundSig_19887484	HPCAL1
Troester_WoundSig_19887484	CYR61
Troester_WoundSig_19887484	IL1B
Troester_WoundSig_19887484	IL13RA2
Troester_WoundSig_19887484	IDO1
Troester_WoundSig_19887484	INHBA
Troester_WoundSig_19887484	KRT6A
Troester_WoundSig_19887484	KRT6B
Troester_WoundSig_19887484	KRT34
Troester_WoundSig_19887484	AFF3
Troester_WoundSig_19887484	LAMA3
Troester_WoundSig_19887484	LAMC2
Troester_WoundSig_19887484	LTBP2
Troester_WoundSig_19887484	LUM
Troester_WoundSig_19887484	MSMB
Troester_WoundSig_19887484	ND4
Troester_WoundSig_19887484	NODAL
Troester_WoundSig_19887484	OGN
Troester_WoundSig_19887484	PCDH8
Troester_WoundSig_19887484	PDGFRL
Troester_WoundSig_19887484	PER1
Troester_WoundSig_19887484	PFKFB3
Troester_WoundSig_19887484	PITX1
Troester_WoundSig_19887484	PML
Troester_WoundSig_19887484	PNLIPRP2
Troester_WoundSig_19887484	S100A8
Troester_WoundSig_19887484	SAA4
Troester_WoundSig_19887484	CCL2
Troester_WoundSig_19887484	TGFB2
Troester_WoundSig_19887484	THBS1
Troester_WoundSig_19887484	TLR2
Troester_WoundSig_19887484	UGT2B17
Troester_WoundSig_19887484	ZIC2
Troester_WoundSig_19887484	TFPI2
Troester_WoundSig_19887484	NR4A3
Troester_WoundSig_19887484	SPARCL1
Troester_WoundSig_19887484	TP63
Troester_WoundSig_19887484	PER2
Troester_WoundSig_19887484	SPAG9
Troester_WoundSig_19887484	CXCL14
Troester_WoundSig_19887484	TMCC2
Troester_WoundSig_19887484	TNFSF15
Troester_WoundSig_19887484	CLEC4M
Troester_WoundSig_19887484	NPM2
Troester_WoundSig_19887484	HOXB13
Troester_WoundSig_19887484	PPP6R1
Troester_WoundSig_19887484	SULF1
Troester_WoundSig_19887484	DICER1
Troester_WoundSig_19887484	ABI3BP
Troester_WoundSig_19887484	EGFL6
Troester_WoundSig_19887484	TIPARP
Troester_WoundSig_19887484	RGS22
Troester_WoundSig_19887484	IGLV2-14
Troester_WoundSig_19887484	A1CF
Troester_WoundSig_19887484	TREM1
Troester_WoundSig_19887484	PGPEP1
Troester_WoundSig_19887484	RGMA
Troester_WoundSig_19887484	ADAMTS9
Troester_WoundSig_19887484	TENM2
Troester_WoundSig_19887484	MKL2
Troester_WoundSig_19887484	VPS18
Troester_WoundSig_19887484	CACHD1
Troester_WoundSig_19887484	GUF1
Troester_WoundSig_19887484	ELSPBP1
Troester_WoundSig_19887484	ZBED2
Troester_WoundSig_19887484	LRRC2
Troester_WoundSig_19887484	CHPF
Troester_WoundSig_19887484	HMBOX1
Troester_WoundSig_19887484	TMC5
Troester_WoundSig_19887484	BAALC
Troester_WoundSig_19887484	APOLD1
Troester_WoundSig_19887484	VMP1
Troester_WoundSig_19887484	SPACA1
Troester_WoundSig_19887484	FRMD8P1
Troester_WoundSig_19887484	FAM71F1
Troester_WoundSig_19887484	TNS4
Troester_WoundSig_19887484	KIAA1751
Troester_WoundSig_19887484	CROCCP3
Troester_WoundSig_19887484	OSR2
Troester_WoundSig_19887484	LRR1
Troester_WoundSig_19887484	TMEM139
Troester_WoundSig_19887484	CCBE1
Troester_WoundSig_19887484	FAM19A4
Troester_WoundSig_19887484	BMPER
Troester_WoundSig_19887484	YPEL4
Troester_WoundSig_19887484	JAKMIP3
Troester_WoundSig_19887484	LOC284454
Troester_WoundSig_19887484	KRT6C
Troester_WoundSig_19887484	ZNF713
Troester_WoundSig_19887484	SIMC1
Troester_WoundSig_19887484	LOC389332
Troester_WoundSig_19887484	SPDYE8P
Troester_WoundSig_19887484	LOC440934
Troester_WoundSig_19887484	MUC5B
Troester_WoundSig_19887484	C13orf45
Troester_WoundSig_19887484	KRT17P3
Troester_WoundSig_19887484	LOC100131138
MDACC.FNA.1_20805453	TMEM176B
MDACC.FNA.1_20805453	SLCO2B1
MDACC.FNA.1_20805453	CKAP2
MDACC.FNA.1_20805453	CD74
MDACC.FNA.1_20805453	VCAM1
MDACC.FNA.1_20805453	IGLL1
MDACC.FNA.1_20805453	CCL2
MDACC.FNA.1_20805453	GPNMB
MDACC.FNA.1_20805453	PTGDS
MDACC.FNA.1_20805453	CD163
MDACC.FNA.1_20805453	MAFB
MDACC.FNA.1_20805453	HLA-DRB1
MDACC.FNA.1_20805453	PLTP
MDACC.FNA.1_20805453	APOE
MDACC.FNA.1_20805453	C1QB
MDACC.FNA.1_20805453	NTN3
MDACC.FNA.1_20805453	PECAM1
MDACC.FNA.1_20805453	IGKV1D-13
MDACC.FNA.1_20805453	IGKV1OR2-108
MDACC.FNA.1_20805453	IGLJ3
MDACC.FNA.1_20805453	IGKC
MDACC.FNA.1_20805453	IGL
MDACC.FNA.1_20805453	IGHG3
MDACC.FNA.1_20805453	IGHM
MDACC.FNA.1_20805453	HLA-DPA1
MDACC.FNA.1_20805453	HLA-DQB1
MDACC.FNA.1_20805453	HLA-DQA1
MDACC.FNA.1_20805453	IGHG1
MDACC.FNA.1_20805453	IGJ
MDACC.FNA.1_20805453	C1QA
MDACC.FNA.1_20805453	HLA-DRA
IGG_Cluster_21214954	CD27
IGG_Cluster_21214954	IL2RG
IGG_Cluster_21214954	CD79A
IGG_Cluster_21214954	PIM2
IGG_Cluster_21214954	POU2AF1
IGG_Cluster_21214954	IGKC
IGG_Cluster_21214954	IGLV3-25
IGG_Cluster_21214954	IGL
IGG_Cluster_21214954	IGJ
IGG_Cluster_21214954	TNFRSF17
IGG_Cluster_21214954	NTN3
IGG_Cluster_21214954	IL8
IGG_Cluster_21214954	HLA-C
IGG_Cluster_21214954	LAX1
Minterferon_Cluster_21214954	STAT1
Minterferon_Cluster_21214954	IL18BP
Minterferon_Cluster_21214954	XAF1
Minterferon_Cluster_21214954	B2M
Minterferon_Cluster_21214954	RSAD2
Minterferon_Cluster_21214954	EPSTI1
Minterferon_Cluster_21214954	PSMB8
Minterferon_Cluster_21214954	PSMB9
Minterferon_Cluster_21214954	ZC3HAV1
Minterferon_Cluster_21214954	IFI35
Minterferon_Cluster_21214954	DDX58
Minterferon_Cluster_21214954	GBP7
Minterferon_Cluster_21214954	CXCL10
Minterferon_Cluster_21214954	CCL5
Minterferon_Cluster_21214954	GBP6
Minterferon_Cluster_21214954	CXCL9
Minterferon_Cluster_21214954	CD274
Minterferon_Cluster_21214954	HELZ2
Minterferon_Cluster_21214954	UBA7
Minterferon_Cluster_21214954	LGALS3BP
Minterferon_Cluster_21214954	PARP9
Minterferon_Cluster_21214954	IRF9
Minterferon_Cluster_21214954	ADAR
Minterferon_Cluster_21214954	IFIT2
Minterferon_Cluster_21214954	OASL
Minterferon_Cluster_21214954	DDX60
Minterferon_Cluster_21214954	IFIH1
Minterferon_Cluster_21214954	RTP4
Minterferon_Cluster_21214954	GBP4
Minterferon_Cluster_21214954	IFI44
Minterferon_Cluster_21214954	MX1
Minterferon_Cluster_21214954	ISG15
Minterferon_Cluster_21214954	BST2
Minterferon_Cluster_21214954	USP18
Minterferon_Cluster_21214954	IFIT1
Minterferon_Cluster_21214954	OAS2
Minterferon_Cluster_21214954	ZBP1
Minterferon_Cluster_21214954	PARP14
Minterferon_Cluster_21214954	IRGM
Minterferon_Cluster_21214954	STAT2
Minterferon_Cluster_21214954	PARP12
Minterferon_Cluster_21214954	SP100
Minterferon_Cluster_21214954	GBP1
Minterferon_Cluster_21214954	BATF2
Minterferon_Cluster_21214954	NMI
Minterferon_Cluster_21214954	SLFN13
Minterferon_Cluster_21214954	GVINP1
Minterferon_Cluster_21214954	IRF1
ZHANG_INTERFERON_RESPONSE	IRF1
ZHANG_INTERFERON_RESPONSE	IFI27
ZHANG_INTERFERON_RESPONSE	IFRD1
ZHANG_INTERFERON_RESPONSE	STAT1
ZHANG_INTERFERON_RESPONSE	MX2
ZHANG_INTERFERON_RESPONSE	OAS1
ZHANG_INTERFERON_RESPONSE	OASL
ZHANG_INTERFERON_RESPONSE	ISG15
ZHANG_INTERFERON_RESPONSE	MX1
ZHANG_INTERFERON_RESPONSE	IFIT2
ZHANG_INTERFERON_RESPONSE	SP110
ZHANG_INTERFERON_RESPONSE	IFITM3
ZHANG_INTERFERON_RESPONSE	OAS2
ZHANG_INTERFERON_RESPONSE	IFNB1
[truncated: 2,727 more rows]

## Sheet: Supplementary Table 3
Supplementary Table 3. The basic clinical information of 96 GIAC patients from our center.
ID	Patient name	Age	Gender	Stage	Tumor volume(cm3)	Sampling time
1	CRC1	55	Female	Ⅱ	7.77	2019.10.10
2	CRC2	62	Female	Ⅲb	8.4	2019.10.21
3	CRC3	57	Male	Ⅲa	18	2019.11.05
4	CRC4	76	Female	Ⅲa	13.5	2019.11.09
5	CRC5	68	Female	Ⅳa	14	2019.11.28
6	CRC6	70	Male	Ⅳa	9.6	2019.12.11
7	CRC7	72	Female	Ⅱb	19.5	2019.12.12
8	CRC8	58	Female	Ⅱb	52.5	2019.12.05
9	CRC9	73	Male	NA	10.2	2019.12.15
10	CRC10	49	Male	Ⅱb	60	2019.12.24
11	CRC11	65	Female	Ⅲb	150	2019.12.30
12	CRC12	72	Male	Ⅲa	2.5	2020.01.04
13	CRC13	62	Female	Ⅲa	9	2020.01.11
14	CRC14	62	Female	Ⅱb	60	2020.01.15
15	CRC15	53	Male	Ⅳ	24	2020.01.17
16	CRC16	64	Male	Ⅲa	2.7	2020.01.28
17	CRC17	81	Male	Ⅱb	18	2020.01.31
18	CRC18	68	Female	Ⅲb	9	2020.02.04
19	CRC19	83	Male	Ⅱb	13.5	2020.02.15
20	CRC20	48	Female	Ⅱb	104	2020.02.17
21	CRC21	70	Male	Ⅱb	5	2020.03.15
22	CRC22	43	Male	Ⅱb	51	2020.03.16
23	CRC23	61	Male	Ⅲa	20.21	2020.03.20
24	CRC24	76	Male	Ⅱb	17.5	2020.03.28
25	CRC25	79	Male	Ⅲa	7.2	2020.04.06
26	CRC26	65	Male	ⅢA	8.32	2020.04.10
27	CRC27	77	Male	ⅢB	19.6	2020.04.12
28	CRC28	44	Female	ⅢA	12	2020.04.16
29	CRC29	61	Male	Ⅱb	16.2	2020.05.03
30	CRC30	54	Female	Ⅱb	15.12	2020.05.10
31	CRC31	67	Male	ⅢB	28.8	2020.05.11
32	CRC32	70	Female	Ⅲc	5.25	2020.05.14
33	CRC33	73	Male	Ⅲc	8.372	2020.05.15
34	CRC34	63	Male	Ⅰ	55	2020.05.17
35	CRC35	79	Male	ⅢB	47.3	2020.05.19
36	CRC36	86	Male	Ⅱb	24.75	2020.05.23
37	CRC37	78	Female	Ⅱb	48	2020.05.23
38	CRC38	27	Female	Ⅱb	14	2020.05.24
39	CRC39	72	Male	Ⅲa	13.5	2020.05.27
40	CRC40	50	Female	Ⅳa	9.6	2020.05.28
41	CRC41	67	Male	Ⅲc	12.48	2020.06.01
42	CRC42	82	Female	ⅢB	18	2020.06.03
43	CRC43	33	Male	Ⅲa	30	2020.06.04
44	CRC44	57	Female	Ⅲa	20	2020.06.07
45	CRC45	68	Male	Ⅱb	9.48	2020.06.08
46	CRC46	73	Female	Ⅲb	47.86	2020.06.10
47	CRC47	75	Female	Ⅲa	0.03	2020.06.13
48	CRC48	77	Female	Ⅱb	64.26	2020.06.16
49	CRC49	55	Male	Ⅱb	10.8	2020.06.17
50	CRC50	63	Male	IIIa	3	2020.06.18
51	CRC51	46	Male	NA	7	2020.06.19
52	CRC52	33	Male	Ⅲa	20	2020.06.20
53	CRC53	66	Male	Ⅱb	9	2020.06.21
54	CRC54	67	Male	Ⅲb	NA	2020.06.22
55	CRC55	60	Male	Ⅱb	35	2020.06.25
56	GAD1	54	Female	IVc	NA	2021.03.15
57	GAD2	68	Female	IVa	NA	2021.03.16
58	GAD3	71	Male	IV	NA	2021.03.27
59	GAD4	81	Male	IVa	NA	2021.03.28
60	GAD5	63	Male	IIIa	NA	2021.04.01
61	GAD6	76	Male	NA	9	2021.04.02
62	GAD7	52	Female	IIa	24.8	2021.04.09
63	GAD8	78	Male	IV	NA	2021.04.12
64	GAD9	58	Male	IIa	NA	2021.04.24
65	GAD10	58	Female	Ia	4.05	2021.04.26
66	GAD11	45	Female	IIIb	2.92	2021.04.30
67	GAD12	56	Male	IIIc	NA	2021.05.18
68	GAD13	86	Female	IIIb	NA	2021.06.03
69	GAD14	56	Male	NA	7.5	2021.06.08
70	GAD15	79	Male	NA	12	2021.06.11
71	GAD16	77	Male	IIIb	11.76	2021.06.16
72	GAD17	77	Male	IV	25.704	2021.06.30
73	GAD18	83	Male	III	24	2021.07.03
74	GAD19	67	Male	IIIa	5.304	2021.09.10
75	GAD20	72	Male	IV	NA	2021.09.23
76	GAD21	64	Male	III	NA	2021.10.11
77	GAD22	70	Male	IV	NA	2021.10.11
78	GAD23	70	Male	IIIb	1.5	2021.10.15
79	GAD24	50	Female	IIb	1.75	2021.10.19
80	GAD25	83	Male	Ia	7.5	2021.10.22
81	GAD26	74	Female	IV	NA	2021.10.28
82	GAD27	77	Male	IIIc	NA	2021.11.01
83	GAD28	73	Male	III	18	2021.12.08
84	GAD29	76	Female	IIIa	10.56	2022.01.03
85	GAD30	65	Male	IV	1.872	2022.01.07
86	GAD31	69	Male	IV	NA	2022.03.12
87	GAD32	65	Male	IV	NA	2022.03.12
88	ESAD1	84	Female	IV	NA	2020.08.24
89	ESAD2	57	Female	IV	NA	2021.03.17
90	ESAD3	54	Male	IIIb	56	2021.06.09
91	ESAD4	82	Male	IVb	NA	2021.08.28
92	ESAD5	53	Male	IVa	72.576	2021.11.19
93	ESAD6	79	Female	IVc	NA	2021.12.07
94	ESAD7	84	Female	IV	NA	2022.01.03
95	ESAD8	84	Female	IV	NA	2022.01.10
96	ESAD9	77	Male	IVa	NA	2022.03.28

## Sheet: Supplementary Table 5
Supplementary Table 5. The RNA expression of 6 genes in 96 pairs of tumor and matched adjacent normal samples in GIAC patients detected by qRT-PCR.
Patient_name	group	C6orf223	EPHX4	HES6	NKD2	OLR1	ONECUT2
CRC1	Normal	4.41	3.23	1.22	1.48	0.9	5.63
CRC2	Normal	4.14	2.96	1.78	0.84	1.39	5.46
CRC3	Normal	2.65	1.47	2.36	3.5	3.65	3.1
CRC4	Normal	5.21	1	2.62	4.27	2.72	3.59
CRC5	Normal	2.18	2.2	1.61	3.45	0.65	4.92
CRC6	Normal	3.38	3.01	1.31	4.55	1.65	2.85
CRC7	Normal	4.19	2.7	1.98	2.18	1.43	3.85
CRC8	Normal	3.88	3.67	2.69	1.8	3.11	3.63
CRC9	Normal	5.53	0.95	1.34	1.69	2.84	5.31
CRC10	Normal	4.85	0.65	1.44	2.17	1.35	5.04
CRC11	Normal	2.13	0.74	2.77	1.23	3.91	3.55
CRC12	Normal	1.83	1.3	2.21	4.57	0.88	3.08
CRC13	Normal	1.92	3.04	1.39	2.58	2.08	4.28
CRC14	Normal	2.48	3.69	2.49	1.26	2.89	5.09
CRC15	Normal	4.22	3.39	2.68	2.1	2.58	4.78
CRC16	Normal	4.87	1.5	2.3	4.37	4.23	3.03
CRC17	Normal	4.57	0.86	2.19	3.94	3.55	2.73
CRC18	Normal	2.68	3.52	2.67	1.44	0.83	2.82
CRC19	Normal	2.04	3.47	1.73	2.24	0.53	3.38
CRC20	Normal	4.7	2.2	2.51	1.95	0.62	5.12
CRC21	Normal	5.47	1.82	1.76	1.1	1.18	5.47
CRC22	Normal	4.65	1.71	2.6	1.33	4.32	3.58
CRC23	Normal	3.38	2.19	2.31	2.37	2.92	2.94
CRC24	Normal	3	1.25	1.88	4.21	3.57	5.6
CRC25	Normal	2.89	2.6	1.94	2.95	3.27	5.55
CRC26	Normal	3.37	1.28	2.74	1.57	1.38	4.28
CRC27	Normal	2.43	2.12	2.45	3.89	0.74	3.9
CRC28	Normal	3.78	1.46	1.6	2.73	3.4	3.79
CRC29	Normal	2.46	2.26	1.83	1.86	4.17	4.27
CRC30	Normal	3.3	1.97	2.87	2.71	3.35	3.33
CRC31	Normal	5.14	1.12	2.15	2.33	2.08	4.68
CRC32	Normal	2.64	1.35	2.07	3.32	1.7	3.36
CRC33	Normal	3.44	2.39	1.83	3.61	1.59	4.2
CRC34	Normal	3.15	2.97	2.36	3.69	2.07	3.54
CRC35	Normal	2.3	1.59	2.83	2.91	1.13	4.34
CRC36	Normal	2.53	2.75	1.26	4.25	2.48	4.05
CRC37	Normal	3.57	1.88	1.55	3.02	1.16	3.2
CRC38	Normal	5.41	2.73	1.63	4.09	2	3.43
CRC39	Normal	4.15	2.35	2.72	3.94	4.27	4.47
CRC40	Normal	2.77	3.34	2.19	3.39	3.84	5.05
CRC41	Normal	5.09	3.63	2.03	1.72	1.34	3.67
CRC42	Normal	3.93	3.71	1.88	1.66	2.14	4.83
CRC43	Normal	3.06	2.93	1.33	4.5	1.85	3.96
CRC44	Normal	3.91	3.04	2.22	2.1	1	4.81
CRC45	Normal	3.53	3.41	2.16	2.13	1.23	4.43
CRC46	Normal	4.52	1.74	2.44	1.61	2.27	5.42
CRC47	Normal	4.81	1.68	2.6	3.14	4.11	5.01
CRC48	Normal	4.89	2.12	2.63	2.19	2.85	5.12
CRC49	Normal	4.11	2.15	2.11	4.5	1.47	5.49
CRC50	Normal	5.45	1.63	2.69	2.14	3.79	3.82
CRC51	Normal	4.22	3.16	2.44	0.64	2.63	3.76
CRC52	Normal	5.29	2.21	2.64	3.85	1.76	4.2
CRC53	Normal	5.14	2.16	2.79	3.31	2.61	4.23
CRC54	Normal	4.59	0.66	1.14	3.39	2.23	3.71
CRC55	Normal	2.92	3.33	1.79	3.47	3.22	5.24
CRC1	Tumor	4.68	3.67	3.68	6.04	3.48	5.58
CRC2	Tumor	3.03	2.02	2.03	6.52	1.83	5.78
CRC3	Tumor	4.84	3.83	3.84	3.68	3.64	4.13
CRC4	Tumor	5.95	4.94	3.07	7.15	4.75	5.94
CRC5	Tumor	4.07	3.06	4.18	3.84	2.87	5.69
CRC6	Tumor	5.88	4.87	4.33	3.07	4.68	4.49
CRC7	Tumor	5.18	4.17	2.03	4.88	3.98	5.17
CRC8	Tumor	5.33	4.32	3.42	4.18	4.13	4.42
CRC9	Tumor	3.03	2.02	2.79	4.33	1.83	4.13
CRC10	Tumor	4.42	3.41	2.8	2.03	5.43	5.17
CRC11	Tumor	3.79	2.78	4.45	5.63	3.22	5.52
CRC12	Tumor	3.8	2.79	3.86	2.8	2.59	4.89
CRC13	Tumor	5.45	4.44	2.8	5.37	2.6	4.9
CRC14	Tumor	4.86	3.85	3.26	5.44	4.25	5.96
CRC15	Tumor	3.8	2.79	2.15	2.15	3.66	4.9
CRC16	Tumor	4.26	3.25	1.96	7.08	2.6	5.84
CRC17	Tumor	6.17	5.16	3.26	6.15	5.17	4.91
CRC18	Tumor	3.15	2.14	4.43	4	3.06	5.36
CRC19	Tumor	2.96	1.95	4	7.44	5.24	4.98
CRC20	Tumor	4.26	3.25	2.67	5.62	4.97	4.71
CRC21	Tumor	5.43	4.42	2.7	3.32	1.95	4.25
CRC22	Tumor	5	3.99	2.32	7.33	1.76	4.06
CRC23	Tumor	3.67	2.66	3.32	6.79	3.06	5.69
CRC24	Tumor	3.7	2.69	2.21	2.12	4.23	5.36
CRC25	Tumor	3.32	2.31	2.98	4.98	3.8	5.63
CRC26	Tumor	6.21	5.2	4.52	3.24	2.47	4.77
CRC27	Tumor	4.32	3.31	2.12	4.13	2.5	4.8
CRC28	Tumor	3.21	2.2	3.24	3.55	2.12	4.42
CRC29	Tumor	3.98	2.97	4.13	4.06	5.28	5.02
CRC30	Tumor	5.52	4.51	3.55	4.79	5.42	5.16
CRC31	Tumor	6.19	5.18	4.06	2.61	5.01	4.75
CRC32	Tumor	3.12	2.11	4.79	3.3	3.12	5.42
CRC33	Tumor	5.98	4.97	2.58	3.42	2.01	4.31
CRC34	Tumor	4.24	3.23	2.61	4.83	2.78	5.08
CRC35	Tumor	5.98	4.97	2.65	4.66	4.32	4.06
CRC36	Tumor	5.13	4.12	2.52	6.52	4.99	5.36
CRC37	Tumor	4.55	3.54	3.3	2.3	1.92	5.68
CRC38	Tumor	5.06	4.05	3.99	6.2	4.78	4.73
CRC39	Tumor	5.79	4.78	3.42	2.79	3.04	4.22
CRC40	Tumor	3.58	2.57	4.66	5.05	4.78	5.54
CRC41	Tumor	3.61	2.6	2.3	4.12	3.93	5.87
CRC42	Tumor	3.65	2.64	2.79	7.17	3.35	4.52
CRC43	Tumor	3.52	2.51	4.12	3.05	3.86	5.34
CRC44	Tumor	4.3	3.29	2.05	6.45	4.59	4.52
CRC45	Tumor	4.99	3.98	3.05	2.28	2.38	5.54
CRC46	Tumor	4.42	3.41	2.83	3.48	2.41	5.65
CRC47	Tumor	5.83	4.82	4.51	3.98	2.45	4.33
CRC48	Tumor	5.66	4.65	4.24	5.63	2.32	4.68
CRC49	Tumor	3.3	2.29	2.75	2.23	3.1	4.71
CRC50	Tumor	3.79	2.78	2.28	7.05	3.79	4.75
CRC51	Tumor	6.05	5.04	3.48	2.02	5.22	4.62
CRC52	Tumor	5.12	4.11	4.29	2.58	5.16	5.4
CRC53	Tumor	3.05	2.04	3.98	5.98	3.22	4.96
CRC54	Tumor	4.05	3.04	2.23	4.97	4.63	4.9
CRC55	Tumor	3.83	2.82	1.93	4.67	4.46	5.52
GAD1	Normal	3.75	2.33	2.51	5.17	4.3	4.89
GAD2	Normal	4.42	1.82	2.55	4.59	3.35	3.54
GAD3	Normal	3.31	3.14	2.42	5.1	2.84	4.36
GAD4	Normal	4.08	2.12	3.2	3.62	4.16	3.54
GAD5	Normal	3.06	2.94	3.89	3.65	3.14	4.56
GAD6	Normal	4.36	2.12	2.76	3.69	3.96	4.67
GAD7	Normal	4.68	3.14	2.7	3.56	3.14	3.35
GAD8	Normal	3.73	1.93	3.32	4.34	4.16	3.7
GAD9	Normal	3.22	2.28	2.17	5.03	4.27	3.73
GAD10	Normal	4.54	2.31	2	4.46	2.95	3.77
GAD11	Normal	3.52	2.35	3.86	5.7	3.3	3.64
GAD12	Normal	4.34	2.22	2.2	3.34	3.33	4.42
GAD13	Normal	3.52	3	3.54	3.83	3.37	3.98
GAD14	Normal	4.54	2.56	2.69	5.16	3.24	3.92
GAD15	Normal	4.65	2.5	2.39	3.09	4.02	4.54
GAD16	Normal	3.33	3.12	4.02	4.09	3.58	3.39
GAD17	Normal	3.68	1.97	1.95	3.87	3.52	3.22
GAD18	Normal	3.71	1.8	2.95	5.55	4.14	3.42
GAD19	Normal	3.75	2	2.73	5.28	2.99	4.76
GAD20	Normal	3.62	2.49	1.85	3.79	2.82	3.91
GAD21	Normal	4.4	2.19	3.79	3.32	3.02	3.61
GAD22	Normal	3.96	1.75	2.65	4.52	4.36	3.17
GAD23	Normal	3.9	2.75	2.65	5.33	3.51	4.17
GAD24	Normal	4.52	2.53	2.18	5.02	3.21	3.95
GAD25	Normal	3.37	1.65	3.38	3.27	2.77	3.07
GAD26	Normal	3.2	2.45	3.88	2.97	3.77	5.01
GAD27	Normal	3.4	2.45	2.97	3.06	3.55	3.87
GAD28	Normal	3.89	1.98	2.29	3.62	2.67	3.87
GAD29	Normal	3.59	2.77	2.13	5.36	3.47	3.4
GAD30	Normal	3.15	2.09	1.83	5.71	3.47	4.6
GAD31	Normal	4.15	1.93	1.92	3.82	3	4.19
GAD32	Normal	3.93	1.63	2.48	3.18	4.2	3.51
GAD1	Tumor	5.08	3.05	4.13	5.38	5.28	5.47
GAD2	Tumor	5.56	3.53	2.48	3.73	3.83	4.02
GAD3	Tumor	5.28	3.25	4.29	5.54	5.39	4.38
GAD4	Tumor	3.63	2.88	3.52	6.65	4.19	5.06
GAD5	Tumor	5.44	3.41	4.63	4.77	4.87	4.31
GAD6	Tumor	5.19	3.16	4.78	6.58	4.12	4.02
GAD7	Tumor	3.99	3.24	2.48	5.88	3.83	5.06
GAD8	Tumor	4.67	3.17	3.87	6.03	4.87	5.41
GAD9	Tumor	3.92	2.88	3.24	3.73	5.22	4.78
GAD10	Tumor	3.63	2.99	3.25	5.12	4.59	4.79
GAD11	Tumor	4.67	3.64	4.9	4.49	4.6	4.79
GAD12	Tumor	5.02	3.65	4.31	4.5	4.6	4.8
GAD13	Tumor	4.39	3.43	3.25	6.15	4.61	5.25
GAD14	Tumor	4.4	3.65	3.71	5.56	5.06	4.87
GAD15	Tumor	5.46	3.31	2.6	4.5	4.68	4.6
GAD16	Tumor	4.4	2.83	2.41	4.96	4.41	4.14
GAD17	Tumor	5.34	3.46	3.71	3.85	3.95	3.95
GAD18	Tumor	4.41	3	4.88	3.66	3.76	5.25
GAD19	Tumor	4.86	2.81	4.45	4.96	5.39	4.66
GAD20	Tumor	4.48	3.16	3.12	6.13	5.06	4.69
GAD21	Tumor	4.21	2.83	3.15	5.7	5.33	4.31
GAD22	Tumor	3.75	3.57	2.77	4.37	4.47	4.91
GAD23	Tumor	3.56	3.1	3.77	4.4	4.5	5.05
GAD24	Tumor	5.19	3.52	2.66	4.02	4.12	4.64
GAD25	Tumor	4.86	3.55	3.43	5.02	4.72	5.31
GAD26	Tumor	5.6	3.17	4.97	3.91	4.86	4.2
GAD27	Tumor	5.13	3.5	2.57	4.68	4.45	4.97
GAD28	Tumor	4.27	2.89	3.69	6.22	5.12	3.95
GAD29	Tumor	4.3	3.06	4.58	3.82	4.01	5.25
GAD30	Tumor	3.92	2.81	4	6.68	4.78	4.62
GAD31	Tumor	4.52	2.83	4.51	4.94	3.76	4.11
GAD32	Tumor	4.66	3.15	3.03	6.68	5.06	5.43
ESAD1	Normal	3.6	2.55	1.85	3.5	3.63	3.04
ESAD2	Normal	3.6	3.2	2.89	4.54	3.98	3.69
ESAD3	Normal	3.61	3.21	3.24	4.89	3.35	3.7
ESAD4	Normal	4.06	2.99	2.61	4.26	3.36	3.48
ESAD5	Normal	3.68	3.21	2.62	4.27	4.42	3.7
ESAD6	Normal	3.41	2.87	2.62	4.27	3.36	3.36
ESAD7	Normal	2.95	3.22	2.63	5.21	4.3	3.71
ESAD8	Normal	2.76	2.39	3.08	4.28	3.37	2.88
ESAD9	Normal	4.06	3.23	2.7	4.73	3.82	3.72
ESAD1	Tumor	5.13	3.31	3.34	6.06	5.1	4.05
ESAD2	Tumor	3.68	3.79	3.82	6.54	5.3	4.53
ESAD3	Tumor	4.04	3.51	3.54	6.26	3.65	4.25
ESAD4	Tumor	4.72	3.14	3.17	4.61	5.46	3.88
ESAD5	Tumor	3.97	3.67	3.7	6.42	5.21	4.41
ESAD6	Tumor	3.68	3.42	3.45	6.17	4.01	4.16
ESAD7	Tumor	4.72	3.5	3.53	4.97	4.69	4.24
ESAD8	Tumor	5.07	3.43	4.21	5.65	3.94	4.17
ESAD9	Tumor	4.44	3.14	3.46	4.9	3.65	3.88

## Sheet: Supplementary Table 6
Supplementary Table 6. The protein expression of 5 genes in 27 pairs of tumor and matched adjacent normal samples in GIAC patients detected by Western blot.
Patient_name	group	gene	expression
CRC1	Normal	EPHX4	0.46
CRC1	Tumor	EPHX4	1.31
CRC2	Normal	EPHX4	1.35
CRC2	Tumor	EPHX4	2.5
CRC3	Normal	EPHX4	1.01
CRC3	Tumor	EPHX4	1.84
CRC4	Normal	EPHX4	1.15
CRC4	Tumor	EPHX4	1
CRC5	Normal	EPHX4	0.3
CRC5	Tumor	EPHX4	0.54
CRC6	Normal	EPHX4	0.75
CRC6	Tumor	EPHX4	1.7
CRC7	Normal	EPHX4	0.67
CRC7	Tumor	EPHX4	1.07
CRC8	Normal	EPHX4	0.99
CRC8	Tumor	EPHX4	1.92
CRC9	Normal	EPHX4	1.07
CRC9	Tumor	EPHX4	1.3
CRC10	Normal	EPHX4	0.69
CRC10	Tumor	EPHX4	1.37
CRC1	Normal	HES6	0.49
CRC1	Tumor	HES6	1.16
CRC2	Normal	HES6	1.11
CRC2	Tumor	HES6	2.25
CRC3	Normal	HES6	0.92
CRC3	Tumor	HES6	1.33
CRC4	Normal	HES6	0.86
CRC4	Tumor	HES6	0.72
CRC5	Normal	HES6	0.28
CRC5	Tumor	HES6	0.25
CRC6	Normal	HES6	0.98
CRC6	Tumor	HES6	1.13
CRC7	Normal	HES6	0.67
CRC7	Tumor	HES6	1.25
CRC8	Normal	HES6	1.2
CRC8	Tumor	HES6	0.97
CRC9	Normal	HES6	1.1
CRC9	Tumor	HES6	1.31
CRC10	Normal	HES6	0.83
CRC10	Tumor	HES6	1.16
CRC1	Normal	NKD2	1.04
CRC1	Tumor	NKD2	1.69
CRC2	Normal	NKD2	1.13
CRC2	Tumor	NKD2	1.51
CRC3	Normal	NKD2	1.27
CRC3	Tumor	NKD2	1.52
CRC4	Normal	NKD2	1.16
CRC4	Tumor	NKD2	1.05
CRC5	Normal	NKD2	0.54
CRC5	Tumor	NKD2	0.75
CRC6	Normal	NKD2	0.87
CRC6	Tumor	NKD2	1.16
CRC7	Normal	NKD2	1.04
CRC7	Tumor	NKD2	1.4
CRC8	Normal	NKD2	1.38
CRC8	Tumor	NKD2	1.54
CRC9	Normal	NKD2	0.62
CRC9	Tumor	NKD2	0.65
CRC10	Normal	NKD2	0.97
CRC10	Tumor	NKD2	1.64
CRC1	Normal	OLR1	0.54
CRC1	Tumor	OLR1	1.27
CRC2	Normal	OLR1	1.15
CRC2	Tumor	OLR1	2.11
CRC3	Normal	OLR1	1.15
CRC3	Tumor	OLR1	1.84
CRC4	Normal	OLR1	1.32
CRC4	Tumor	OLR1	1.13
CRC5	Normal	OLR1	0.59
CRC5	Tumor	OLR1	0.7
CRC6	Normal	OLR1	0.12
CRC6	Tumor	OLR1	0.17
CRC7	Normal	OLR1	0.29
CRC7	Tumor	OLR1	0.31
CRC8	Normal	OLR1	0.69
CRC8	Tumor	OLR1	0.9
CRC9	Normal	OLR1	0.72
CRC9	Tumor	OLR1	0.77
CRC10	Normal	OLR1	0.18
CRC10	Tumor	OLR1	0.85
CRC1	Normal	ONECUT2	0.49
CRC1	Tumor	ONECUT2	1.05
CRC2	Normal	ONECUT2	1.01
CRC2	Tumor	ONECUT2	1.74
CRC3	Normal	ONECUT2	0.95
CRC3	Tumor	ONECUT2	1.38
CRC4	Normal	ONECUT2	0.94
CRC4	Tumor	ONECUT2	0.95
CRC5	Normal	ONECUT2	0.56
CRC5	Tumor	ONECUT2	0.72
CRC6	Normal	ONECUT2	0.86
CRC6	Tumor	ONECUT2	1.62
CRC7	Normal	ONECUT2	1.41
CRC7	Tumor	ONECUT2	1.46
CRC8	Normal	ONECUT2	0.8
CRC8	Tumor	ONECUT2	0.92
CRC9	Normal	ONECUT2	1.05
CRC9	Tumor	ONECUT2	1.28
CRC10	Normal	ONECUT2	1.1
CRC10	Tumor	ONECUT2	1.51
GAD1	Normal	EPHX4	0.28
GAD1	Tumor	EPHX4	0.38
GAD2	Normal	EPHX4	0.41
GAD2	Tumor	EPHX4	0.91
GAD3	Normal	EPHX4	0.7
GAD3	Tumor	EPHX4	1.11
GAD4	Normal	EPHX4	0.84
GAD4	Tumor	EPHX4	0.48
GAD5	Normal	EPHX4	1.09
GAD5	Tumor	EPHX4	1.45
GAD6	Normal	EPHX4	0.26
GAD6	Tumor	EPHX4	0.3
GAD7	Normal	EPHX4	0.28
GAD7	Tumor	EPHX4	0.41
GAD8	Normal	EPHX4	0.98
GAD8	Tumor	EPHX4	1.12
GAD9	Normal	EPHX4	0.53
GAD9	Tumor	EPHX4	0.72
GAD10	Normal	EPHX4	1.43
GAD10	Tumor	EPHX4	1.62
GAD1	Normal	HES6	0.58
GAD1	Tumor	HES6	0.75
GAD2	Normal	HES6	0.78
GAD2	Tumor	HES6	1.21
GAD3	Normal	HES6	1.27
GAD3	Tumor	HES6	1.64
GAD4	Normal	HES6	1.35
GAD4	Tumor	HES6	0.95
GAD5	Normal	HES6	1.66
GAD5	Tumor	HES6	2.2
GAD6	Normal	HES6	0.5
GAD6	Tumor	HES6	0.59
GAD7	Normal	HES6	0.69
GAD7	Tumor	HES6	0.86
GAD8	Normal	HES6	1.07
GAD8	Tumor	HES6	1.25
GAD9	Normal	HES6	0.97
GAD9	Tumor	HES6	1.1
GAD10	Normal	HES6	1
GAD10	Tumor	HES6	1.2
GAD1	Normal	NKD2	0.21
GAD1	Tumor	NKD2	0.34
GAD2	Normal	NKD2	0.32
GAD2	Tumor	NKD2	0.66
GAD3	Normal	NKD2	0.49
GAD3	Tumor	NKD2	0.83
GAD4	Normal	NKD2	0.75
GAD4	Tumor	NKD2	0.49
GAD5	Normal	NKD2	0.84
GAD5	Tumor	NKD2	1.3
GAD6	Normal	NKD2	0.62
GAD6	Tumor	NKD2	0.65
GAD7	Normal	NKD2	0.72
GAD7	Tumor	NKD2	0.88
GAD8	Normal	NKD2	0.61
GAD8	Tumor	NKD2	0.58
GAD9	Normal	NKD2	0.4
GAD9	Tumor	NKD2	0.54
GAD10	Normal	NKD2	1.43
GAD10	Tumor	NKD2	1.58
GAD1	Normal	OLR1	0.14
GAD1	Tumor	OLR1	0.19
GAD2	Normal	OLR1	0.24
GAD2	Tumor	OLR1	0.52
GAD3	Normal	OLR1	0.41
GAD3	Tumor	OLR1	0.79
GAD4	Normal	OLR1	0.71
GAD4	Tumor	OLR1	0.4
GAD5	Normal	OLR1	0.77
GAD5	Tumor	OLR1	1.19
GAD6	Normal	OLR1	0.28
GAD6	Tumor	OLR1	0.37
GAD7	Normal	OLR1	0.42
GAD7	Tumor	OLR1	0.55
GAD8	Normal	OLR1	0.23
GAD8	Tumor	OLR1	0.34
GAD9	Normal	OLR1	1.08
GAD9	Tumor	OLR1	1.27
GAD10	Normal	OLR1	0.54
GAD10	Tumor	OLR1	0.77
GAD1	Normal	ONECUT2	0.45
GAD1	Tumor	ONECUT2	0.47
GAD2	Normal	ONECUT2	0.58
GAD2	Tumor	ONECUT2	1.13
GAD3	Normal	ONECUT2	0.64
GAD3	Tumor	ONECUT2	0.96
GAD4	Normal	ONECUT2	1.01
GAD4	Tumor	ONECUT2	0.79
GAD5	Normal	ONECUT2	0.96
GAD5	Tumor	ONECUT2	1.15
GAD6	Normal	ONECUT2	0.25
GAD6	Tumor	ONECUT2	0.32
GAD7	Normal	ONECUT2	0.8
GAD7	Tumor	ONECUT2	0.94
GAD8	Normal	ONECUT2	1.38
GAD8	Tumor	ONECUT2	1.56
GAD9	Normal	ONECUT2	1.05
GAD9	Tumor	ONECUT2	1.31
GAD10	Normal	ONECUT2	0.94
GAD10	Tumor	ONECUT2	1.11
ESAD1	Normal	EPHX4	0.93
ESAD1	Tumor	EPHX4	1.07
ESAD2	Normal	EPHX4	0.97
ESAD2	Tumor	EPHX4	1.12
ESAD3	Normal	EPHX4	0.99
ESAD3	Tumor	EPHX4	1.16
ESAD4	Normal	EPHX4	0.44
ESAD4	Tumor	EPHX4	0.63
ESAD5	Normal	EPHX4	2.18
ESAD5	Tumor	EPHX4	2.4
ESAD6	Normal	EPHX4	0.82
ESAD6	Tumor	EPHX4	0.98
ESAD7	Normal	EPHX4	0.51
ESAD7	Tumor	EPHX4	0.58
ESAD1	Normal	HES6	0.82
ESAD1	Tumor	HES6	1.05
ESAD2	Normal	HES6	0.53
ESAD2	Tumor	HES6	0.61
ESAD3	Normal	HES6	0.75
ESAD3	Tumor	HES6	0.89
ESAD4	Normal	HES6	0.51
ESAD4	Tumor	HES6	0.69
ESAD5	Normal	HES6	0.5
ESAD5	Tumor	HES6	0.51
ESAD6	Normal	HES6	0.8
ESAD6	Tumor	HES6	0.91
ESAD7	Normal	HES6	0.75
ESAD7	Tumor	HES6	0.93
ESAD1	Normal	NKD2	0.48
ESAD1	Tumor	NKD2	0.43
ESAD2	Normal	NKD2	0.95
ESAD2	Tumor	NKD2	1.22
ESAD3	Normal	NKD2	0.59
ESAD3	Tumor	NKD2	0.72
ESAD4	Normal	NKD2	1.23
ESAD4	Tumor	NKD2	1.62
ESAD5	Normal	NKD2	0.77
ESAD5	Tumor	NKD2	0.9
ESAD6	Normal	NKD2	1.02
ESAD6	Tumor	NKD2	1.14
ESAD7	Normal	NKD2	0.74
ESAD7	Tumor	NKD2	0.98
ESAD1	Normal	OLR1	1
ESAD1	Tumor	OLR1	1.41
ESAD2	Normal	OLR1	0.93
ESAD2	Tumor	OLR1	0.99
ESAD3	Normal	OLR1	0.81
ESAD3	Tumor	OLR1	0.97
ESAD4	Normal	OLR1	0.08
ESAD4	Tumor	OLR1	0.14
ESAD5	Normal	OLR1	0.98
ESAD5	Tumor	OLR1	1.12
ESAD6	Normal	OLR1	1.09
ESAD6	Tumor	OLR1	1.24
ESAD7	Normal	OLR1	0.99
ESAD7	Tumor	OLR1	1.08
ESAD1	Normal	ONECUT2	0.9
ESAD1	Tumor	ONECUT2	0.95
ESAD2	Normal	ONECUT2	0.8
ESAD2	Tumor	ONECUT2	1.04
ESAD3	Normal	ONECUT2	1.57
ESAD3	Tumor	ONECUT2	1.63
ESAD4	Normal	ONECUT2	2.39
ESAD4	Tumor	ONECUT2	2.58
ESAD5	Normal	ONECUT2	1.81
ESAD5	Tumor	ONECUT2	2.58
ESAD6	Normal	ONECUT2	0.99
ESAD6	Tumor	ONECUT2	1.09
ESAD7	Normal	ONECUT2	1
ESAD7	Tumor	ONECUT2	1.34

## Sheet: Supplementary Table 7
Supplementary Table 7. The infiltration fraction of six immune cell types in GIAC tumor samples.
	B_cell	CD4_Tcell	CD8_Tcell	Neutrophil	Macrophage	Dendritic
TCGA-DM-A288-01	0.104695	0.115292	0.228792	0.0934038	0	0.457817
TCGA-QL-A97D-01	0.0697698	0.169739	0.182544	0.133605	0	0.444343
TCGA-CM-6164-01	0.0573012	0.135785	0.169683	0.133843	0.0110852	0.492303
TCGA-G4-6299-01	0.0300575	0.168538	0.201208	0.0959394	0.15617	0.348087
TCGA-F4-6463-01	0.0471786	0.144195	0.211084	0.0855223	0.0833336	0.428686
TCGA-AZ-4615-01	0.0712674	0.0395219	0.263824	0.118492	0.0887132	0.418182
TCGA-AA-3549-01	0.0420368	0.147372	0.144014	0.165728	0	0.50085
TCGA-AY-4071-01	0.0785431	0.160002	0.12118	0.118071	0.00636587	0.515838
TCGA-CM-4752-01	0.122697	0.136494	0.142248	0.0998809	0.0496581	0.449023
TCGA-DM-A1D9-01	0.101489	0.139141	0.202541	0.0995383	0.000235571	0.457055
TCGA-AA-3688-01	0.0814212	0.175478	0.131837	0.106283	0.0536593	0.451322
TCGA-AA-3854-01	0.0889937	0.129306	0.113025	0.113555	0.0194743	0.535645
TCGA-A6-3809-01	0.0640722	0.0652223	0.175782	0.151822	0.0346564	0.508445
TCGA-CM-6165-01	0.0970792	0.114674	0.154949	0.0775703	0.12815	0.427578
TCGA-CM-4751-01	0.0853705	0.161435	0.145561	0.115336	0.0103871	0.48191
TCGA-A6-5659-01	0.0775539	0.12075	0.189291	0.102513	0.0789452	0.430947
TCGA-AA-3494-01	0.0410532	0.161005	0.143555	0.121394	0.040474	0.492519
TCGA-CM-4750-01	0.0626407	0.162935	0.131972	0.112455	0	0.529998
TCGA-AZ-4682-01	0.0790511	0.107776	0.227833	0.112896	0	0.472444
TCGA-G4-6625-01	0.119317	0.154033	0.124439	0.0979163	0.0253657	0.478929
TCGA-DM-A0XF-01	0.0324554	0.12982	0.200543	0.112871	0.027368	0.496943
TCGA-AA-3529-01	0.00199133	0.140342	0.140383	0.10377	0.000963725	0.61255
TCGA-AA-3949-01	0.0119384	0.0071824	0.317845	0.165789	0.0594197	0.437825
TCGA-AA-3848-01	0.0126164	0.32173	0	0.120657	0.00839588	0.536601
TCGA-CA-6715-01	0.0371012	0.112392	0.218339	0.105738	0.0337674	0.492662
TCGA-AA-3818-01	0.0949935	0.0795129	0.201081	0.0792363	0.029629	0.515547
TCGA-AA-3710-01	0.0548713	0.0739046	0.182025	0.18302	0.062952	0.443227
TCGA-AA-3950-01	0.0611711	0	0.191775	0.190113	0.112331	0.44461
TCGA-AA-A00N-01	0.0602354	0.100684	0.150741	0.122361	0.0904495	0.475528
TCGA-A6-6138-01	0.0232695	0.13071	0.169656	0.124129	0.0753901	0.476846
TCGA-DM-A28E-01	0.0905813	0.123082	0.21846	0.10946	0	0.458416
TCGA-D5-6538-01	0.0866575	0.17153	0.145468	0.0512158	0.103612	0.441517
TCGA-AA-A00K-01	0.0731242	0.138219	0.167266	0.0976005	0	0.523791
TCGA-AA-3715-01	0.0386319	0.111335	0.0883488	0.149187	0.0116509	0.600847
TCGA-AA-3506-01	0.0297709	0.200117	0.0512881	0.130255	0.0205861	0.567983
TCGA-AU-3779-01	0.0526289	0.222137	0.104221	0.136395	0.0267724	0.457845
TCGA-CK-5916-01	0.0385427	0.0756441	0.252488	0.117162	0.0842081	0.431955
TCGA-QG-A5Z1-01	0.060945	0.120675	0.17864	0.0902097	0.0727058	0.476824
TCGA-AD-6890-01	0.0294831	0.187787	0.148783	0.105145	0	0.528802
TCGA-A6-2685-01	0.059434	0.139242	0.0832769	0.110644	0.12503	0.482373
TCGA-AA-A00W-01	0.0736648	0.15483	0.16153	0.11533	0	0.494645
TCGA-CK-5914-01	0.0789426	0.0913404	0.224058	0.120072	0	0.485587
TCGA-A6-2686-01	0.0415458	0.0731052	0.235114	0.125291	0.0576265	0.467318
TCGA-CA-5255-01	0.0714011	0.0912008	0.217791	0.0825348	0.0303689	0.506703
TCGA-A6-A5ZU-01	0.10127	0.0865357	0.174547	0.0686382	0.0859587	0.483051
TCGA-NH-A50V-01	0.0709509	0.196983	0.114902	0.125576	0.0548949	0.436693
TCGA-QG-A5YX-01	0.113029	0.160426	0.163158	0.0989477	0	0.46444
TCGA-A6-2677-01	0.093063	0.199148	0.132521	0.0662485	0.0710838	0.437936
TCGA-CA-6717-01	0.128605	0.134363	0.124918	0.0909201	0.0858025	0.435392
TCGA-A6-6649-01	0.0771241	0.20748	0.109759	0.112044	0.0746902	0.418903
TCGA-NH-A6GC-01	0.111482	0.166659	0.148583	0.0814175	0	0.491858
TCGA-AA-3562-01	0.105608	0.13262	0.1302	0.0903455	0.0558852	0.485341
TCGA-A6-4105-01	0.0455695	0.0918838	0.183458	0.134871	0.0780094	0.466208
TCGA-A6-6141-01	0.128966	0.165849	0.172415	0.0708944	0.0205192	0.441356
TCGA-AA-A00R-01	0.0296831	0.13879	0.241532	0.146983	0	0.443012
TCGA-AZ-4684-01	0.0730273	0.144522	0.138928	0.125209	0.0522263	0.466087
TCGA-CK-6747-01	0.0696705	0.145631	0.170887	0.0945662	0.0152483	0.503997
TCGA-AU-6004-01	0.114114	0.126017	0.0981332	0.125162	0.0687939	0.46778
TCGA-A6-2672-01	0.0156123	0.0725679	0.196031	0.199277	0.0478521	0.46866
TCGA-QG-A5Z2-01	0.22779	0.148491	0.139303	0.0833955	0	0.401022
TCGA-A6-6780-01	0.037044	0.0642611	0.20133	0.131792	0.0986069	0.466965
TCGA-F4-6459-01	0.0494274	0.130754	0.135312	0.077932	0.129791	0.476783
TCGA-AA-3970-01	0.0995933	0.159971	0.142684	0.101626	0.0597375	0.436389
TCGA-NH-A8F7-01	0.0171585	0.180929	0.154732	0.110829	0.0116271	0.524724
TCGA-G4-6321-01	0.0868173	0.0699325	0.231378	0.121475	0	0.490398
TCGA-AY-6196-01	0.0834516	0.173992	0.102629	0.0971041	0.139725	0.403098
TCGA-AA-3524-01	0.0746727	0.0831308	0.219083	0.111997	0	0.511117
TCGA-DM-A1D0-01	0.103529	0.165543	0.154512	0.0740339	0	0.502381
TCGA-G4-6307-01	0.0993809	0.229198	0.080638	0.0888806	0.00373728	0.498166
TCGA-DM-A1HB-01	0.0768527	0.0625827	0.190262	0.15374	0.00500008	0.511562
TCGA-AA-3697-01	0.0713149	0.13412	0.13238	0.12698	0.0386096	0.496596
TCGA-CM-6679-01	0.0773362	0.160106	0.153006	0.107524	0.100362	0.401665
TCGA-AY-6197-01	0.0372817	0.160514	0.135615	0.181889	0	0.484701
TCGA-AA-3672-01	0.0511641	0.126885	0.0797516	0.161689	0.0352561	0.545255
TCGA-AA-3684-01	0.0414678	0.150826	0.0461296	0.114481	0.115035	0.532061
TCGA-A6-2684-01	0.052232	0.189139	0.0166849	0.125449	0.00694248	0.609552
TCGA-AZ-4323-01	0.245471	0.257324	0.106593	0.0653415	0.0516228	0.273647
TCGA-AA-3971-01	0.110552	0.146133	0.123442	0.0984053	0.0199046	0.501563
TCGA-AA-3989-01	0.124148	0.134082	0.133896	0.0839562	0.033537	0.490381
TCGA-AA-A00D-01	0.0622458	0.157664	0.14832	0.139212	0.0884325	0.404126
TCGA-AD-6548-01	0	0.143368	0.145546	0.178583	0.0624321	0.470072
TCGA-D5-6539-01	0.0894306	0.13917	0.170701	0.0969547	0.0691012	0.434642
TCGA-G4-6302-01	0.0252716	0.189182	0.118782	0.0922069	0.143443	0.431115
TCGA-A6-2679-01	0.2082	0.293454	0	0.0782454	0	0.420101
TCGA-A6-2674-01	0	0.00471214	0.144064	0.35259	0.106185	0.392449
TCGA-AZ-4614-01	0.0706182	0.305481	0.117892	0.1097	0	0.396308
TCGA-NH-A5IV-01	0.0494051	0.0911843	0.216777	0.0987634	0.139797	0.404073
TCGA-A6-5664-01	0.0444657	0.129495	0.191	0.110837	0.11098	0.413222
TCGA-AZ-4315-01	0.0787361	0.0867366	0.1986	0.10917	0.00202467	0.524733
TCGA-F4-6806-01	0.120531	0.105654	0.207522	0.0814083	0.0115312	0.473353
TCGA-AA-3510-01	0.112252	0.121585	0.116479	0.102921	0.0195994	0.527164
TCGA-AY-A71X-01	0.116499	0.100948	0.217059	0.0760604	0.000132457	0.489301
TCGA-AA-3488-01	0.0707346	0.161058	0.0779824	0.117095	0	0.57313
TCGA-DM-A28F-01	0.0850503	0.191777	0.133021	0.0951188	0	0.495033
TCGA-G4-6293-01	0.0619299	0.163427	0.173531	0.103153	0.0164085	0.481551
TCGA-5M-AAT4-01	0.0900531	0.184958	0.100996	0.129489	0	0.494504
TCGA-D5-6533-01	0.0562846	0.137785	0.14031	0.130117	0.0518618	0.483642
TCGA-A6-5657-01	0.199226	0.230855	0.0635976	0.109634	0.0356859	0.361002
TCGA-AA-3941-01	0.110882	0.117707	0.212328	0.0980783	0.0436474	0.417357
TCGA-DM-A28K-01	0.111099	0.119579	0.19955	0.0867531	0	0.483019
TCGA-CM-5344-01	0.069885	0.156265	0.162388	0.0887816	0.0252316	0.497448
TCGA-AA-3517-01	0.0506856	0.164257	0.139427	0.12877	0.0137431	0.503117
TCGA-G4-6309-01	0.0581696	0.116493	0.214664	0.099667	0.0180602	0.492946
TCGA-AY-6386-01	0.0820063	0.128766	0.154744	0.116808	0.0202075	0.497468
TCGA-AA-3678-01	0.0776741	0.1566	0.128472	0.137503	0.0276254	0.472126
TCGA-AA-A01X-01	0.0261966	0.286406	0.0474618	0.0948977	0.0406777	0.50436
TCGA-AA-3821-01	0.0784239	0.122057	0.167496	0.0999979	0.0771038	0.454922
TCGA-CM-6677-01	0.084415	0.17474	0.132798	0.10327	0.0582303	0.446547
TCGA-CM-5861-01	0.0381863	0.107051	0.196153	0.109544	0.0565394	0.492526
TCGA-D5-6923-01	0.0449674	0.174465	0.0879123	0.146972	0.0768132	0.468871
TCGA-F4-6703-01	0.083046	0.0951352	0.108763	0.113299	0.110897	0.488861
TCGA-AZ-6605-01	0.0846686	0.147277	0.152491	0.0977398	0.0980216	0.419802
TCGA-NH-A6GB-01	0.0478516	0.0901636	0.221554	0.149874	0	0.490557
TCGA-CM-5349-01	0.126326	0.103964	0.152243	0.101297	0.0571416	0.459028
TCGA-NH-A50U-01	0.0712152	0.257226	0.0317258	0.1052	0.0475	0.487133
TCGA-AA-3530-01	0.145838	0.123386	0.190154	0.0787468	0.0593072	0.402568
TCGA-G4-6627-01	0.0324739	0.167126	0.171161	0.132924	0.0181421	0.478174
TCGA-DM-A28G-01	0.0935981	0.11696	0.237061	0.0611967	0	0.491184
TCGA-D5-6537-01	0.0225213	0.103334	0.218926	0.164361	0	0.490857
TCGA-D5-5539-01	0.0823948	0.127528	0.159931	0.104961	0.108679	0.416506
TCGA-CM-6163-01	0.0913014	0.187203	0.138794	0.111494	0.087365	0.383842
TCGA-CM-4744-01	0.104413	0	0.332499	0.0817757	0	0.481313
TCGA-AA-A004-01	0.0082756	0.279865	0.0290899	0.111451	0.0232042	0.548114
TCGA-A6-3808-01	0.0874334	0.100883	0.157165	0.109586	0.0696286	0.475304
TCGA-AA-A010-01	0.114722	0.153754	0.110299	0.0962904	0.017995	0.50694
TCGA-AA-A02J-01	0.0586822	0.172059	0.145078	0.117176	0	0.507005
TCGA-AA-3837-01	0.0864597	0.182883	0.0970006	0.0869604	0.016523	0.530173
TCGA-CK-4947-01	0.108819	0.131865	0.16148	0.0874733	0.0823521	0.42801
TCGA-CA-5256-01	0.08379	0.043426	0.320329	0.0708313	0	0.481624
TCGA-CM-6167-01	0.0707499	0.216827	0.104257	0.0770846	0.158204	0.372877
TCGA-4N-A93T-01	0.0862443	0.262621	0.0726489	0.0873055	0	0.491181
TCGA-AA-3521-01	0.072553	0.154822	0.122868	0.105044	0.0059413	0.538771
TCGA-CA-5797-01	0.0743332	0.12359	0.152108	0.0795495	0.16213	0.40829
TCGA-CM-6166-01	0.0802008	0.188753	0.157727	0.074082	0.0441918	0.455045
TCGA-CK-4951-01	0.0484952	0.140978	0.134864	0.157432	0.0707537	0.447477
TCGA-CA-6719-01	0.0716312	0.132031	0.138152	0.10001	0.12229	0.435886
TCGA-AA-A02R-01	0.159968	0.0644843	0.0794478	0.0867966	0.0256543	0.583649
TCGA-AA-A02O-01	0.0458346	0.246032	0.0488085	0.0925937	0	0.566731
TCGA-A6-5666-01	0.0776222	0.0846367	0.252681	0.0989783	0	0.486081
TCGA-AY-5543-01	0.116904	0.0469764	0.234563	0.103853	0	0.497705
TCGA-AA-3845-01	0.0759542	0.0919419	0.255463	0.119646	0.0637321	0.393262
TCGA-F4-6704-01	0.0668993	0.181618	0.120666	0.0875817	0.176897	0.366338
TCGA-AA-3856-01	0.142633	0.145887	0.0944708	0.0864295	0.0411395	0.489441
TCGA-AA-A00Q-01	0.0634281	0.154814	0.1868	0.0890518	0	0.505907
TCGA-A6-6781-01	0	0.095882	0.165371	0.160181	0.124192	0.454374
TCGA-AA-A00F-01	0.0597	0.198132	0.118856	0.0949836	0.0223859	0.505943
TCGA-D5-6920-01	0.0519847	0.114291	0.184783	0.147177	0.00476641	0.496997
TCGA-AA-3815-01	0.0765014	0.113448	0.196418	0.143078	0.0352675	0.435287
TCGA-D5-5538-01	0.0543653	0.0942797	0.122368	0.137274	0.0922671	0.499445
TCGA-AA-3867-01	0.0911906	0.144178	0.101572	0.0665174	0.113455	0.483087
TCGA-A6-6782-01	0.048551	0.134259	0.178411	0.108449	0.0701907	0.46014
TCGA-A6-6654-01	0.0136782	0.101838	0.148815	0.148384	0.0981826	0.489102
TCGA-AA-A01D-01	0.0349949	0.144545	0.0884739	0.111313	0.131785	0.488889
TCGA-G4-6311-01	0.0964098	0.152316	0.0805806	0.136485	0.0433731	0.490835
TCGA-A6-3807-01	0.0382964	0.126518	0.149296	0.175094	0.0324383	0.478357
TCGA-AZ-5403-01	0.0664775	0.093512	0.197798	0.111896	0.0743301	0.455986
TCGA-AD-6888-01	0.0419093	0.130485	0.156867	0.122489	0.0487563	0.499494
TCGA-G4-6628-01	0.164904	0.0135087	0.230663	0.0608238	0.047387	0.482713
TCGA-DM-A1D6-01	0.090146	0.125054	0.143024	0.0545126	0	0.587263
TCGA-CM-5341-01	0.0238218	0.0167521	0.254072	0.149051	0.101115	0.455188
TCGA-AA-3862-01	0.13506	0.0966775	0.17865	0.103687	0.00614601	0.47978
TCGA-AA-3939-01	0.107327	0.0830283	0.218168	0.106554	0	0.484923
TCGA-AA-3514-01	0.0245641	0.216376	0.0098983	0.0531268	0.0328758	0.663159
TCGA-AA-3660-01	0.0888827	0.156572	0.109873	0.100646	0.0644989	0.479528
TCGA-AA-3833-01	0.020095	0.109355	0.161704	0.156363	0.033103	0.51938
TCGA-AA-A01P-01	0.19729	0.0792155	0.0526395	0.140863	0	0.529992
TCGA-AA-A00Z-01	0.0577429	0.225254	0.0696136	0.120128	0.0224753	0.504787
TCGA-CM-5863-01	0.0579812	0.103182	0.204624	0.109521	0.0949292	0.429762
TCGA-AZ-6598-01	0.0714012	0.148447	0.179073	0.10257	0.0815139	0.416995
TCGA-AA-3679-01	0.0620004	0.12398	0.183492	0.115666	0.0658192	0.449043
TCGA-G4-6304-01	0.0434571	0.162157	0.170707	0.117232	0	0.506447
TCGA-DM-A285-01	0.0682649	0.218715	0.0855325	0.0994919	0.0573292	0.470666
TCGA-G4-6294-01	0.0812283	0.144502	0.175002	0.0904473	0.0132143	0.495607
TCGA-A6-4107-01	0.121648	0.125137	0.138934	0.0884122	0.0318661	0.494003
TCGA-DM-A1D4-01	0.0978106	0.189263	0.167311	0.0937019	0	0.451913
TCGA-CA-6716-01	0.0712505	0.138897	0.217121	0.0879881	0.0294748	0.455269
TCGA-CK-4952-01	0.0829523	0.163971	0.104318	0.185898	0.0475594	0.415301
TCGA-AA-A01V-01	0.00295635	0.21453	0.133724	0.112886	0	0.535903
TCGA-AA-3844-01	0.0992354	0.120574	0.192903	0.101954	0.00372839	0.481606
TCGA-D5-6541-01	0.0814109	0.0982991	0.106997	0.0926513	0.12279	0.497852
TCGA-AA-A01G-01	0.0819573	0.170438	0.145747	0.116386	0.0202383	0.465233
TCGA-AA-3870-01	0.0918504	0.120188	0.11303	0.0901878	0.110734	0.47401
TCGA-D5-6532-01	0.0835556	0.141574	0.160509	0.0986865	0.0807758	0.4349
TCGA-CM-6169-01	0.0405749	0.143259	0.144994	0.12484	0.109397	0.436935
TCGA-D5-5541-01	0.0628243	0.128334	0.120911	0.114115	0.109138	0.464678
TCGA-DM-A1DB-01	0.0933691	0.142675	0.199825	0.0768047	0.0721217	0.415204
TCGA-AA-A00A-01	0.110677	0.0847057	0.174085	0.0917316	0.0105252	0.528275
TCGA-D5-6530-01	0.0777296	0.0924739	0.189518	0.139008	0.0109727	0.490298
TCGA-AA-3855-01	0.124795	0.125094	0.138356	0.0853797	0	0.526375
TCGA-CM-5868-01	0.0910871	0.160384	0.142233	0.086958	0.071384	0.447954
TCGA-AA-3519-01	0.0647554	0.12999	0.158131	0.139413	0.00760201	0.500109
TCGA-AA-3526-01	0.031881	0.126459	0.177332	0.165488	0	0.49884
TCGA-DM-A28M-01	0.105633	0.137494	0.198602	0.0834014	0	0.474869
TCGA-D5-6926-01	0.0180573	0.131475	0.110833	0.191034	0.0774191	0.471181
TCGA-AA-3534-01	0.0436511	0.142269	0.199289	0.0857861	0.0161874	0.512817
TCGA-G4-6317-01	0.092847	0.172323	0.162029	0.0693412	0	0.50346
TCGA-AA-A03J-01	0.0313257	0.183249	0.0996272	0.120478	0	0.56532
TCGA-CM-6680-01	0.0492864	0.179948	0.140929	0.118648	0.038355	0.472834
TCGA-AA-A01K-01	0.0631568	0.171493	0.136618	0.1037	0.0571936	0.467838
TCGA-AA-3984-01	0.0368082	0.145701	0.177018	0.154226	0	0.486247
TCGA-D5-6536-01	0.0647152	0.0589889	0.192618	0.145902	0.0577596	0.480017
TCGA-AD-A5EK-01	0.0460468	0.204361	0.17248	0.108733	0.00709739	0.461281
TCGA-AA-3663-01	0.0470989	0.0430303	0.2247	0.117651	0.00335896	0.56416
TCGA-AZ-6607-01	0	0.103285	0.198423	0.152026	0.149372	0.396894
TCGA-AA-3520-01	0.101947	0.116414	0.127806	0.105782	0.0648416	0.48321
TCGA-AA-3543-01	0.0752551	0.136527	0.144553	0.144435	0.0407643	0.458465
TCGA-AZ-5407-01	0.0988477	0.145148	0.233944	0.0804214	0.0256935	0.415945
TCGA-G4-6314-01	0.0432038	0.189255	0.123238	0.0951481	0.0799058	0.469249
TCGA-CM-5348-01	0.0372642	0.147934	0.100438	0.115511	0.097781	0.501072
TCGA-CK-6751-01	0.0732514	0.107887	0.22685	0.0917781	0	0.500233
TCGA-D5-6929-01	0.149533	0.149042	0.125725	0.101278	0.0428666	0.431556
TCGA-AA-3675-01	0.122055	0.111123	0.164353	0.113695	0	0.488775
TCGA-A6-2681-01	0.0135615	0.213882	0.0370952	0.137825	0.109389	0.488246
TCGA-AA-3869-01	0.0760063	0.106802	0.167127	0.132349	0.091756	0.42596
TCGA-DM-A282-01	0.0632984	0.107302	0.256127	0.0548908	0.0171976	0.501184
TCGA-D5-7000-01	0.0591498	0.135152	0.157598	0.131845	0.0797577	0.436497
TCGA-AM-5821-01	0	0.103048	0.233318	0.192649	0.0201546	0.45083
TCGA-G4-6298-01	0.00934447	0.166576	0.185035	0.104005	0	0.535039
TCGA-AA-A01S-01	0.0423585	0.238851	0.0311398	0.104164	0	0.583486
TCGA-NH-A8F8-01	0.0326402	0.200919	0.103566	0.112695	0.039387	0.510793
TCGA-AA-3966-01	0.00587065	0.0773703	0.139797	0.225778	0.0523086	0.498875
TCGA-AA-3516-01	0.0909057	0.0346304	0.199815	0.0998464	0	0.574802
TCGA-A6-2676-01	0.0556953	0.0588373	0.167793	0.144093	0.0854859	0.488096
TCGA-AA-3846-01	0.11061	0.0767896	0.196831	0.108593	0.016687	0.49049
TCGA-AA-3544-01	0.104938	0.0826515	0.163126	0.0887374	0.0258987	0.534648
TCGA-AA-3956-01	0.0971906	0.163433	0.141096	0.110155	0.0630181	0.425107
TCGA-AA-3532-01	0.138125	0.135038	0.0741312	0.104269	0.0491746	0.499263
TCGA-AA-3955-01	0.0947797	0.0838925	0.232573	0.0927777	0.0454168	0.45056
TCGA-CK-5912-01	0.0646258	0.117077	0.223937	0.0989773	0.0624896	0.432893
TCGA-AD-6895-01	0.0129707	0.14014	0.2171	0.15838	0.0130857	0.458324
TCGA-AA-3556-01	0.14424	0.113012	0.109986	0.128347	0.0430871	0.461328
TCGA-CM-6678-01	0.0813256	0.114593	0.223141	0.0611728	0.0352142	0.484553
TCGA-AA-3851-01	0.128119	0.111545	0.166732	0.100157	0.0650212	0.428426
TCGA-CM-5860-01	0.0665191	0.109273	0.151159	0.126694	0.0694305	0.476924
TCGA-A6-5661-01	0.124274	0.127849	0.171221	0.106074	0.0133658	0.457216
TCGA-AA-A02F-01	0.110584	0.130962	0.21374	0.0841745	0	0.460539
TCGA-AA-3861-01	0.162584	0.105704	0.176232	0.081297	0.0170857	0.457097
TCGA-DM-A1DA-01	0.0862611	0.171395	0.163143	0.100283	0.00215005	0.476767
TCGA-CM-6162-01	0.0505653	0.111472	0.118557	0.162153	0.136412	0.420841
TCGA-AA-3522-01	0.134484	0.103651	0.192859	0.0783435	0.0718705	0.418792
TCGA-AA-A00U-01	0.064344	0.189483	0.133915	0.13275	0.00117193	0.478337
TCGA-F4-6807-01	0.0565516	0.154156	0.181967	0.116517	0.0965773	0.39423
TCGA-AA-3930-01	0.0730575	0.152053	0.118295	0.15563	0.0774295	0.423535
TCGA-AZ-6599-01	0.0923669	0.136902	0.234638	0.0897141	0	0.446378
TCGA-AA-3947-01	0.0828582	0	0.261792	0.161434	0.0830044	0.410911
TCGA-AA-3841-01	0.0539512	0.231374	0	0.134289	0.0243983	0.555988
TCGA-CM-6171-01	0.0693185	0.0983599	0.154334	0.161343	0.110899	0.405746
TCGA-CM-4743-01	0.118829	0.121677	0.137386	0.189777	0	0.43233
TCGA-AA-3814-01	0.0602622	0.112378	0.147041	0.118792	0.075065	0.486462
TCGA-NH-A6GA-01	0.0538173	0.208085	0.112455	0.113458	0.0850397	0.427145
TCGA-A6-2675-01	0.0377701	0.12355	0.133572	0.126931	0.1137	0.464477
TCGA-G4-6297-01	0.029112	0.149016	0.149412	0.131515	0.102511	0.438434
TCGA-A6-5656-01	0.0395867	0.116189	0.207432	0.121267	0	0.515525
TCGA-DM-A0X9-01	0.0775668	0.10598	0.261431	0.0908418	0.0285237	0.435656
TCGA-AA-3553-01	0.0641702	0.133842	0.158406	0.137182	0.0482158	0.458183
TCGA-DM-A0XD-01	0.0736223	0.1635	0.132777	0.117444	0	0.512657
TCGA-AA-3511-01	0.0604218	0.141208	0.158898	0.105339	0.0717626	0.462371
TCGA-A6-A56B-01	0.0641415	0.160779	0.137245	0.101687	0.0458769	0.49027
TCGA-A6-5667-01	0.0885264	0.149254	0.113282	0.106247	0.0666164	0.476074
TCGA-AA-3866-01	0.0609753	0.120637	0.105558	0.127774	0.0781941	0.506862
TCGA-AA-A017-01	0.0418594	0.21751	0.0937855	0.14571	0	0.501135
TCGA-CM-6674-01	0.079765	0.0619837	0.223588	0.109723	0.0654043	0.459536
TCGA-DM-A1D8-01	0.118626	0.161429	0.162698	0.0865443	0	0.470703
TCGA-CM-6170-01	0.0451191	0.170266	0.133953	0.135678	0.047268	0.467717
TCGA-AZ-4616-01	0.107601	0.0899574	0.188146	0.141367	0	0.472929
TCGA-AA-3994-01	0.0729483	0.138881	0.121715	0.0950612	0.00994589	0.561448
TCGA-AA-3877-01	0.132715	0.065181	0.126262	0.143138	0.046568	0.486136
TCGA-WS-AB45-01	0	0.123578	0.0988661	0.225816	0.249791	0.301949
TCGA-AA-A00L-01	0.052524	0.16351	0.177726	0.123976	0	0.482265
TCGA-CM-5864-01	0.113495	0.117056	0.21043	0.0885036	0.0178426	0.452673
TCGA-CA-5254-01	0.139306	0.081007	0.16474	0.109758	0.118673	0.386516
TCGA-D5-6898-01	0.0510855	0.156152	0.113519	0.120881	0.119019	0.439344
TCGA-AA-3696-01	0.0569427	0.199956	0.117905	0.0902581	0.0559217	0.479016
TCGA-DM-A280-01	0.0535206	0.0598405	0.253753	0.0965768	0	0.536309
TCGA-AA-A00O-01	0.0395798	0.149179	0.179531	0.100959	0.0915578	0.439194
TCGA-QG-A5YW-01	0.119923	0.221768	0.0543408	0.10564	0.00323165	0.495096
TCGA-AD-6965-01	0.0691942	0.194906	0.174664	0.0913662	0.0421337	0.427736
TCGA-CK-4948-01	0.00804334	0.208136	0.0840015	0.144949	0.0521152	0.502754
TCGA-DM-A1HA-01	0.03293	0.157517	0.219526	0.129501	0	0.460525
TCGA-5M-AAT5-01	0.0502383	0.0877055	0.242616	0.0987691	0	0.520672
TCGA-F4-6809-01	0.115452	0.199635	0.129678	0.0932935	0.0587059	0.403235
TCGA-CM-4748-01	0.0409034	0.182738	0.111071	0.138256	0.0263351	0.500697
TCGA-AA-3858-01	0.117186	0.196035	0.0542648	0.0997549	0.019466	0.513293
TCGA-D5-6531-01	0.00606011	0.179135	0.135109	0.139899	0.0746214	0.465176
TCGA-AA-3662-01	0.00667887	0.0947238	0.228284	0.174253	0.0601673	0.435893
TCGA-AM-5820-01	0.0623804	0.129893	0.150105	0.0721073	0.0876129	0.497901
TCGA-AA-A02K-01	0.0212052	0.241827	0.0870445	0.104478	0.0806289	0.464817
TCGA-G4-6310-01	0.0707257	0.201093	0.140228	0.0848951	0.0580498	0.445008
TCGA-AD-6889-01	0.0557892	0.0962421	0.199051	0.149525	0	0.499393
TCGA-AA-3872-01	0.0482542	0.15293	0.0979829	0.114357	0.135052	0.451423
TCGA-AA-A01R-01	0.101167	0.187268	0.0809332	0.0959219	0	0.53471
TCGA-AA-3975-01	0.0533393	0.206701	0.0686816	0.114823	0.0619511	0.494504
TCGA-5M-AAT6-01	0.10757	0.114815	0.169154	0.104305	0.0951003	0.409056
TCGA-D5-6931-01	0.0866892	0.165498	0.105823	0.112297	0.08403	0.445663
TCGA-D5-6924-01	0.0966612	0.147174	0.0951241	0.125747	0.0910334	0.444261
TCGA-AA-3860-01	0.100019	0.145007	0.142008	0.129203	0.0343138	0.44945
TCGA-A6-5665-01	0.111186	0.0439097	0.273607	0.11221	0	0.459087
TCGA-5M-AATA-01	0.033765	0.199002	0.163039	0.151382	0.0118657	0.440947
TCGA-D5-6540-01	0.0635797	0.121704	0.136035	0.162709	0	0.515972
TCGA-CA-6718-01	0.075828	0.130343	0.113221	0.169036	0.000649757	0.510922
TCGA-AA-3986-01	0.121184	0.197701	0.108849	0.112577	0.00907546	0.450614
TCGA-G4-6323-01	0.318051	0.150903	0.115344	0.0636567	0.018783	0.333262
TCGA-A6-A566-01	0.103379	0.0709728	0.12374	0.0943875	0.152286	0.455235
TCGA-AZ-6608-01	0.1071	0.163952	0.158147	0.0949731	0	0.475827
TCGA-AA-3712-01	0.0601653	0.145745	0.132519	0.138853	0.0275266	0.495192
TCGA-A6-5662-01	0.0556867	0.125959	0.185772	0.0934101	0.0490313	0.490141
TCGA-AA-3831-01	0.0875387	0.158709	0.126411	0.090584	0.0611577	0.475599
TCGA-AA-A02H-01	0.0687148	0.173701	0.138322	0.125483	0	0.49378
TCGA-CM-6676-01	0.0245854	0.159395	0.156429	0.10899	0.0668331	0.483768
TCGA-AD-6899-01	0.0671937	0.179403	0.0889569	0.113407	0.0860442	0.464995
TCGA-AA-3685-01	0.0798231	0.137944	0.148146	0.140457	0	0.49363
TCGA-CK-5915-01	0.0774465	0.147971	0.170225	0.0789298	0.0712247	0.454203
TCGA-AA-3548-01	0.138467	0.185455	0.0918791	0.0635145	0.0535573	0.467128
TCGA-F4-6569-01	0.0294461	0.13843	0.151876	0.0903	0.162611	0.427337
TCGA-F4-6461-01	0.247108	0.164703	0.0766185	0.0794524	0.0423568	0.389761
TCGA-F4-6854-01	0.067599	0.181569	0.121766	0.113749	0.0563871	0.458929
TCGA-F4-6856-01	0.0851043	0.154486	0.156562	0.0950607	0	0.508786
TCGA-AY-A54L-01	0.0432668	0.0856666	0.28045	0.107715	0	0.482902
TCGA-AA-3538-01	0.115394	0.107711	0.135961	0.112439	0.0707242	0.457771
TCGA-AA-3842-01	0.0587688	0.127012	0.155268	0.101534	0.107473	0.449943
TCGA-AZ-4308-01	0	0.236021	0.0372133	0.12006	0	0.606706
TCGA-CK-6746-01	0	0.130461	0.179755	0.123198	0.090476	0.47611
TCGA-AA-3509-01	0.0756363	0.149054	0.141089	0.111376	0.0416738	0.481171
TCGA-AA-3680-01	0.145295	0.153559	0.163086	0.0772253	0.0655454	0.39529
TCGA-AA-3542-01	0	0.197368	0.133015	0.0836128	0	0.586004
TCGA-AD-6964-01	0.044419	0.133535	0.157191	0.10943	0.141864	0.413561
TCGA-A6-6650-01	0.102345	0.180882	0.118288	0.106553	0.0172949	0.474639
TCGA-A6-6140-01	0.038557	0.118695	0.224268	0.130963	0	0.487517
TCGA-AA-A024-01	0.0145629	0.0673896	0.217012	0.0609047	0	0.640131
TCGA-A6-2682-01	0.0332831	0.110613	0.110029	0.19775	0	0.548325
TCGA-CM-6675-01	0.085122	0.141797	0.14636	0.128738	0.0792738	0.418709
TCGA-DM-A1D7-01	0.0796037	0.125706	0.184367	0.107798	0.0049875	0.497538
TCGA-4T-AA8H-01	0.102039	0.177607	0.162842	0.0871792	0	0.470333
TCGA-A6-6653-01	0.113325	0.0597411	0.157916	0.14355	0	0.525467
TCGA-AA-3666-01	0.0681849	0.114546	0.16066	0.151855	0.0595375	0.445217
TCGA-F4-6460-01	0.0786275	0.211211	0.124199	0.0745435	0.0525402	0.458879
TCGA-AA-3655-01	0.0615905	0.166295	0.11526	0.12222	0.0723979	0.462236
TCGA-AA-3673-01	0.0809947	0.182338	0.133891	0.0986004	0.0498988	0.454277
TCGA-AA-3952-01	0.0748561	0.183104	0.0778461	0.0990867	0.0596983	0.505409
TCGA-T9-A92H-01	0.0551597	0.0948058	0.220278	0.104305	0	0.525451
TCGA-AY-4070-01	0.0964175	0.207593	0.0889161	0.0911072	0.0785071	0.437459
TCGA-AY-A8YK-01	0.0783116	0.174732	0.130462	0.11577	0.0547976	0.445926
TCGA-CK-4950-01	0.106208	0.101876	0.192662	0.118947	0.064817	0.41549
TCGA-F4-6570-01	0.0876436	0.078891	0.145549	0.107876	0.112533	0.467507
TCGA-AZ-6600-01	0.0970459	0.171753	0.10614	0.110841	0.0956036	0.418617
TCGA-AA-A00J-01	0.0805502	0.0979506	0.161089	0.0968735	0.130304	0.433233
TCGA-AA-3667-01	0.0163952	0.212532	0.0184001	0.152744	0	0.59993
TCGA-AA-3554-01	0.0352447	0.0927972	0.088813	0.206354	0.077879	0.498912
TCGA-AZ-6606-01	0.100877	0.179399	0.13069	0.126628	0	0.462405
TCGA-AA-3852-01	0.098747	0.146181	0.0917774	0.110841	0.0290488	0.523405
TCGA-D5-6922-01	0.0416692	0.184943	0.0769448	0.114053	0.127425	0.454966
TCGA-A6-6137-01	0.10039	0.19873	0.100067	0.0983872	0.0442116	0.458214
TCGA-AA-3495-01	0.107344	0.120909	0.180449	0.111652	0.0439458	0.4357
TCGA-AA-3489-01	0.162126	0.170941	0.0677005	0.110646	0.120691	0.367895
TCGA-G4-6322-01	0.0617081	0.142684	0.200511	0.0888255	0	0.506272
TCGA-SS-A7HO-01	0.0278202	0.189097	0.179912	0.0771989	0.0894633	0.436508
TCGA-AA-3976-01	0.0734452	0.175137	0.151159	0.108931	0.0216879	0.469641
TCGA-AA-3811-01	0.0856678	0.17699	0.0983904	0.107421	0.0757404	0.455791
TCGA-AD-A5EJ-01	0.0668325	0.0459898	0.261607	0.130026	0	0.495545
TCGA-AA-3819-01	0.0774913	0.159927	0.153005	0.100141	0.0210238	0.488412
TCGA-AA-A02Y-01	0.0745321	0.0610312	0.231205	0.0955665	0	0.537665
TCGA-AZ-6603-01	0.034767	0.188981	0.116717	0.121697	0.0867585	0.451079
TCGA-AA-A022-01	0.140151	0.0269168	0.175433	0.085577	0	0.571922
TCGA-G4-6626-01	0.121381	0.229451	0.0511512	0.0979215	0.0132066	0.486889
TCGA-AA-3875-01	0.0820964	0.125491	0.150011	0.166944	0.0314706	0.443987
TCGA-G4-6306-01	0.0762437	0.129933	0.176503	0.115215	0	0.502106
TCGA-G4-6320-01	0.115153	0.159671	0.155668	0.0770006	0	0.492507
TCGA-CK-6748-01	0.00117475	0.0972497	0.179222	0.121178	0.0808318	0.520343
TCGA-AA-3864-01	0.0873114	0.102283	0.181542	0.109223	0.0513617	0.46828
TCGA-A6-6142-01	0	0.110906	0.138999	0.171324	0.103027	0.475744
TCGA-A6-2678-01	0.0625746	0.118952	0.194939	0.119942	0.0531316	0.450461
TCGA-CA-5796-01	0.124873	0.0984057	0.224349	0.0889394	0.0128427	0.45059
TCGA-A6-A567-01	0.0430808	0.160552	0.205067	0.0983581	0.0810702	0.411872
TCGA-AA-3713-01	0.0826268	0.162536	0.155473	0.13499	0.0380681	0.426306
TCGA-A6-6648-01	0.109129	0.157458	0.144215	0.100503	0.0670579	0.421637
TCGA-A6-A565-01	0.106077	0.267737	0.111732	0.109425	0.0573709	0.347658
TCGA-A6-5660-01	0.107027	0.103046	0.145969	0.1064	0.0691755	0.468382
TCGA-AZ-6601-01	0.0973069	0.131207	0.110288	0.114287	0.0680458	0.478865
TCGA-5M-AATE-01	0.0448345	0.169527	0.149266	0.102971	0.0369215	0.49648
TCGA-CM-6161-01	0.0249781	0.14542	0.236485	0.0698287	0.0562864	0.467002
TCGA-AA-A01Q-01	0.0750329	0.178422	0.166625	0.107241	0	0.472679
TCGA-AZ-4313-01	0.0391694	0.140235	0.159537	0.0740224	0	0.587036
TCGA-A6-6652-01	0.024532	0.225658	0.121122	0.134161	0.0124386	0.482089
TCGA-AA-A00E-01	0.0993837	0.0881408	0.156413	0.0952084	0.0663216	0.494533
TCGA-F4-6808-01	0.0472118	0.138967	0.128306	0.104414	0.135122	0.445979
TCGA-AA-A02W-01	0.0893774	0.16134	0.178025	0.0784269	0.065229	0.427602
TCGA-DM-A28C-01	0.080966	0.162722	0.17023	0.0970842	0	0.488998
TCGA-D5-6927-01	0.00881663	0.135232	0.1417	0.174671	0.0602088	0.479372
TCGA-AA-3980-01	0.0879093	0.114633	0.192494	0.12851	0.0439106	0.432543
TCGA-AA-3681-01	0.0848299	0.133924	0.159559	0.158533	0.034889	0.428265
TCGA-AA-3492-01	0.0642838	0.083334	0.180395	0.113356	0.0647848	0.493847
TCGA-A6-2671-01	0	0.143458	0.105925	0.14201	0.0692841	0.539323
TCGA-D5-6535-01	0.0897766	0.144822	0.132865	0.126996	0	0.505541
TCGA-AA-A029-01	0.0365621	0.11219	0.189867	0.0871541	0	0.574227
TCGA-AD-6963-01	0.109423	0.0984492	0.177615	0.140859	0	0.473654
TCGA-CM-4747-01	0.0556299	0.220561	0.0121787	0.0943207	0	0.617309
TCGA-NH-A50T-01	0.0949894	0.0989529	0.224527	0.0751142	0	0.506417
TCGA-CM-6168-01	0.0591863	0.14224	0.131298	0.11926	0.12063	0.427386
TCGA-AA-3518-01	0.132313	0.0958089	0.141216	0.116425	0	0.514238
TCGA-AA-A01T-01	0	0.187307	0.0925734	0.129481	0	0.590639
TCGA-RU-A8FL-01	0.100132	0.19783	0.156134	0.0868199	0	0.459085
TCGA-A6-6651-01	0.111826	0.156686	0.0912308	0.079345	0.153899	0.407014
TCGA-AA-3850-01	0.144363	0.130025	0.112554	0.100883	0.0345496	0.477625
TCGA-AA-3972-01	0.083154	0.119212	0.176465	0.126892	0.0164517	0.477825
TCGA-AA-3812-01	0	0.133495	0.0424338	0.117458	0	0.706613
TCGA-AY-A69D-01	0.0639774	0.158484	0.177319	0.105093	0	0.495126
TCGA-AA-A01Z-01	0.0351094	0.250412	0.0571383	0.130897	0	0.526443
TCGA-A6-3810-01	0.0543258	0.0949278	0.161706	0.155145	0.0749639	0.458931
TCGA-DM-A28H-01	0.133129	0.212873	0.087586	0.079557	0.0406576	0.446197
TCGA-G4-6586-01	0.0687648	0.0380144	0.331243	0.120681	0.0295758	0.411722
TCGA-D5-6928-01	0.104503	0.15508	0.151267	0.13943	0.049411	0.400309
TCGA-G4-6315-01	0.104304	0.15523	0.1713	0.0883027	0	0.480863
TCGA-D5-6534-01	0.0800567	0.136364	0.0985022	0.0965195	0.101319	0.487238
TCGA-AA-3664-01	0.100852	0.122534	0.169464	0.137453	0.0831777	0.386519
TCGA-G4-6303-01	0.0279129	0.15897	0.135333	0.11406	0.0792393	0.484485
TCGA-AA-3692-01	0.0500002	0.126116	0.164143	0.143177	0.069129	0.447435
TCGA-AA-3968-01	0.0881766	0.152945	0.131878	0.106964	0.0887295	0.431306
TCGA-F4-6805-01	0.0347375	0.143166	0.129778	0.139643	0.0911858	0.46149
TCGA-AA-3560-01	0.11841	0.108211	0.147418	0.105951	0	0.52001
TCGA-D5-5537-01	0.0847112	0.0986702	0.234616	0.0825188	0.0131498	0.486333
TCGA-CM-5862-01	0.0635231	0.154798	0.222742	0.0839364	0.0125332	0.462468
TCGA-D5-6932-01	0.0208407	0.185303	0.137951	0.113631	0.0224764	0.519798
TCGA-AA-3982-01	0.118426	0.117668	0.153823	0.0686124	0.0872587	0.454212
TCGA-DM-A28A-01	0.0857446	0.129944	0.176701	0.0961236	0	0.511487
TCGA-CM-6172-01	0.126702	0.144943	0.132292	0.0853539	0.0865896	0.424119
TCGA-D5-6930-01	0.108686	0.120867	0.181681	0.129131	0.0208045	0.43883
TCGA-D5-6529-01	0.123131	0.140188	0.11706	0.132031	0.0567049	0.430885
TCGA-A6-2683-01	0.00413393	0.217421	0.0226995	0.107526	0	0.64822
TCGA-CK-5913-01	0.083344	0.0911115	0.17541	0.138105	0.0441631	0.467866
TCGA-AA-3977-01	0.110521	0.0925212	0.171592	0.111565	0.0503403	0.46346
TCGA-AA-3496-01	0.0434314	0.165605	0.132617	0.131378	0.102769	0.4242
TCGA-D5-5540-01	0.0121474	0.0351962	0.360179	0.117346	0	0.475131
TCGA-AD-6901-01	0	0.168592	0.146273	0.130415	0.0829713	0.471749
TCGA-AA-A01F-01	0.0363454	0.122083	0.216995	0.114772	0	0.509806
TCGA-AA-3552-01	0.102573	0.191781	0.0801527	0.0870305	0.113215	0.425248
TCGA-F4-6855-01	0.0527635	0.107716	0.146549	0.0903707	0.137799	0.464802
TCGA-AD-5900-01	0.115609	0.0954737	0.183326	0.105613	0.0823509	0.417627
TCGA-AA-3979-01	0.0995692	0.173281	0.0845626	0.174568	0	0.468019
TCGA-AA-A01I-01	0.109558	0.0863416	0.234696	0.0937281	0.0403514	0.435325
TCGA-AA-A03F-01	0.0737869	0.251229	0	0.122739	0	0.552245
TCGA-3L-AA1B-01	0.134215	0.183067	0.135471	0.0726768	0.0467888	0.427781
TCGA-AA-3693-01	0.0910996	0.115308	0.188511	0.0860081	0	0.519073
TCGA-AA-3502-01	0.110436	0.129304	0.168071	0.0820659	0.0652427	0.44488
TCGA-AA-A02E-01	0.0423769	0.142349	0.200188	0.11193	0	0.503157
TCGA-CM-4746-01	0.0509771	0.119123	0.20107	0.130325	0	0.498504
TCGA-G4-6295-01	0.0958167	0.120024	0.226523	0.11278	0.0159426	0.428914
TCGA-AA-A01C-01	0.0683918	0.200147	0.0810933	0.0970422	0.00264298	0.550682
TCGA-G4-6588-01	0.0448768	0.153506	0.134444	0.159058	0.0306067	0.477508
TCGA-A6-2680-01	0.0556512	0.212755	0.0262397	0.132673	0.0118403	0.560841
TCGA-QG-A5YV-01	0.0906863	0.151376	0.174912	0.110291	0	0.472734
TCGA-AA-3561-01	0.110709	0.0834005	0.252134	0.102368	0	0.451388
TCGA-AA-3525-01	0.0713329	0.130438	0.129311	0.124787	0.0378874	0.506243
TCGA-AA-3531-01	0.017799	0.239721	0.0778922	0.118695	0	0.545893
TCGA-AA-3973-01	0.0503976	0.194883	0.113031	0.0807643	0.104089	0.456835
TCGA-AA-3527-01	0.0625104	0.153535	0.048609	0.0630943	0	0.672251
TCGA-AA-3555-01	0.0841356	0.0656055	0.14767	0.203002	0.0390587	0.460527
TCGA-AG-A025-01	0.101036	0.162194	0.146889	0.101302	0.0152149	0.473364
TCGA-EI-6884-01	0.102782	0.116108	0.186573	0.101328	0.0696538	0.423556
TCGA-AG-3582-01	0.0932139	0.128755	0.155384	0.116965	0.0110653	0.494616
TCGA-DC-6154-01	0.0847396	0.116468	0.182969	0.106395	0.065647	0.443781
TCGA-AG-3611-01	0.0774524	0.120616	0.186536	0.104065	0.0898975	0.421434
TCGA-DY-A1DD-01	0.0809204	0.151259	0.170645	0.0969021	0.0462998	0.453974
TCGA-AG-3609-01	0.0883653	0.133441	0.144745	0.144017	0.0385808	0.450852
TCGA-AG-A01L-01	0.0972842	0.150133	0.150798	0.0966782	0.0388632	0.466244
TCGA-AG-4022-01	0.0854786	0.110851	0.183868	0.103452	0.0969562	0.419395
TCGA-AG-A01W-01	0.106524	0.137276	0.174937	0.112331	0.0409271	0.428004
TCGA-AG-A02N-01	0.0983704	0.117268	0.210352	0.097087	0.0376267	0.439296
TCGA-AH-6549-01	0.0946444	0.13645	0.172677	0.117001	0.0359112	0.443316
TCGA-AH-6903-01	0.127004	0.109752	0.18991	0.108365	0.0466839	0.418284
TCGA-AG-3727-01	0.0491375	0.167884	0.119573	0.104199	0.0463357	0.512871
TCGA-F5-6863-01	0.0966968	0.146215	0.169248	0.0992767	0.0474501	0.441113
TCGA-AG-3887-01	0.134979	0.120157	0.169421	0.104098	0	0.471345
TCGA-AG-A01J-01	0.0700415	0.135695	0.168603	0.100445	0.0633669	0.461849
TCGA-AF-5654-01	0.0643993	0.129483	0.178272	0.113528	0.0212551	0.493063
TCGA-DY-A1DE-01	0.0662061	0.166205	0.151341	0.113447	0.0389209	0.463881
TCGA-AF-3913-01	0.100156	0.116529	0.171254	0.11687	0.0658441	0.429346
TCGA-AG-A014-01	0.0802901	0.146496	0.15543	0.114736	0.0372139	0.465835
TCGA-AG-4015-01	0.112412	0.118623	0.164529	0.0906612	0.0571392	0.456635
TCGA-G5-6572-01	0.0887964	0.116611	0.190822	0.100474	0.0712269	0.43207
TCGA-AG-A011-01	0.103058	0.165554	0.140597	0.104139	0.0431869	0.443465
TCGA-EI-6511-01	0.173215	0.0605268	0.18974	0.100823	0.0425567	0.433139
TCGA-AG-4008-01	0.0616106	0.128007	0.170406	0.112036	0.0621601	0.46578
TCGA-AG-3731-01	0.10134	0.152909	0.142871	0.125522	0.0691117	0.408246
TCGA-AG-A032-01	0.0871629	0.151213	0.165275	0.1087	0.0262403	0.461409
TCGA-AH-6544-01	0.0999755	0.117137	0.189026	0.116771	0.0345129	0.442577
TCGA-AG-A020-01	0.101354	0.131186	0.186072	0.107071	0.0159094	0.458409
TCGA-AG-A026-01	0.0798052	0.148339	0.162488	0.105174	0.0262451	0.477948
TCGA-DY-A1H8-01	0.0960951	0.168401	0.157185	0.120136	0.0027125	0.455471
TCGA-AG-3883-01	0.0361377	0.170649	0.124596	0.131563	0.0629605	0.474095
TCGA-EI-7004-01	0.0631777	0.125993	0.147136	0.112564	0.0926389	0.45849
TCGA-AF-6136-01	0.132581	0.10858	0.182904	0.101504	0.0701177	0.404314
TCGA-DC-4745-01	0.0951891	0.121517	0.189228	0.0996152	0.0577482	0.436703
TCGA-EI-6883-01	0.0759346	0.140438	0.187297	0.094094	0.0565613	0.445675
TCGA-EI-6917-01	0.0615391	0.14376	0.116154	0.0968482	0.0896996	0.491999
TCGA-F5-6861-01	0.0820227	0.127771	0.168147	0.0927811	0.0651799	0.464098
TCGA-EI-6508-01	0.0970273	0.108816	0.19734	0.0926048	0.0711242	0.433088
TCGA-F5-6465-01	0.158415	0.0948789	0.170665	0.0850145	0.0873768	0.403649
TCGA-AF-6672-01	0.118519	0.144017	0.173176	0.097532	0.0518783	0.414877
TCGA-AG-3885-01	0.0716102	0.188606	0.125544	0.109199	0.0485069	0.456535
TCGA-EI-6509-01	0.0678273	0.136973	0.177905	0.092267	0.0949903	0.430037
TCGA-DC-5337-01	0.0990953	0.0849909	0.217986	0.125626	0.0294377	0.442864
TCGA-AG-3893-01	0.0716455	0.125554	0.168518	0.102344	0.0883517	0.443587
TCGA-AG-A02G-01	0.0788013	0.156072	0.15757	0.109785	0.0759535	0.421818
TCGA-AG-3901-01	0.100755	0.128961	0.125383	0.106103	0.0822757	0.456522
TCGA-AG-3726-01	0.0489797	0.176208	0.115805	0.108753	0.035157	0.515098
TCGA-AG-3896-01	0.117991	0.128446	0.160835	0.0936273	0.0341111	0.464991
TCGA-DC-6160-01	0.114064	0.108118	0.190166	0.119421	0.0637647	0.404465
TCGA-AG-3581-01	0.0890137	0.118767	0.176677	0.112888	0.0258691	0.476786
TCGA-G5-6641-01	0.099836	0.119191	0.185815	0.100434	0.0683508	0.426372
TCGA-F5-6812-01	0.120328	0.155142	0.150868	0.0891626	0.0618269	0.422673
TCGA-AG-4001-01	0.0837245	0.134683	0.128762	0.0944993	0.115772	0.44256
TCGA-AF-2687-01	0.0537422	0.125289	0.169955	0.133743	0.151962	0.365308
TCGA-AH-6644-01	0.07417	0.136087	0.185671	0.11938	0.101759	0.382933
TCGA-AG-3586-01	0.0883651	0.119789	0.173795	0.100577	0.0427971	0.474677
TCGA-AG-3909-01	0.0988132	0.121336	0.152421	0.0850294	0.0842027	0.458198
TCGA-AG-3878-01	0.132782	0.13309	0.106926	0.0703439	0.0783527	0.478506
TCGA-AG-3592-01	0.0858342	0.138022	0.16707	0.119273	0.0543649	0.435436
TCGA-F5-6814-01	0.126509	0.107262	0.182961	0.0857015	0.0412808	0.456285
TCGA-AG-3605-01	0.102488	0.143653	0.165437	0.131345	0.00663613	0.45044
TCGA-EI-6513-01	0.0917994	0.129547	0.168205	0.0986086	0.0692855	0.442554
TCGA-DC-6158-01	0.0894597	0.11878	0.149559	0.104755	0.130953	0.406494
TCGA-EI-6512-01	0.0797372	0.117125	0.17368	0.119676	0.0540433	0.455738
TCGA-AG-3601-01	0.0941635	0.126982	0.168094	0.113389	0.0482848	0.449087
TCGA-CI-6622-01	0.0848507	0.0890293	0.21276	0.108452	0.0399506	0.464957
TCGA-BM-6198-01	0.0895017	0.115554	0.174159	0.145322	0.0465686	0.428894
TCGA-AG-3881-01	0.0763454	0.127036	0.0913775	0.155406	0.0645816	0.485254
TCGA-DY-A1DC-01	0.122428	0.127477	0.164445	0.0980263	0.03889	0.448733
TCGA-AG-3612-01	0.11951	0.128603	0.146258	0.0931985	0.0454537	0.466977
TCGA-AG-3600-01	0.119844	0.0999383	0.154528	0.0861285	0.0409816	0.49858
TCGA-AG-3599-01	0.0927222	0.124284	0.187268	0.0989865	0.0285741	0.468165
TCGA-AG-3584-01	0.0755786	0.149929	0.146627	0.0900808	0.0707682	0.467017
TCGA-DC-6156-01	0.0451428	0.119462	0.199726	0.100683	0.161184	0.373802
TCGA-DT-5265-01	0.0629932	0.107969	0.154505	0.0993861	0.133422	0.441725
TCGA-AG-3902-01	0.067276	0.148918	0.172582	0.0985053	0.0816121	0.431106
TCGA-AG-A036-01	0.10033	0.1331	0.180283	0.101616	0.0637529	0.420919
TCGA-AG-3593-01	0.132333	0.109483	0.180192	0.0983053	0.0337662	0.44592
TCGA-AG-A01Y-01	0.115469	0.154143	0.133349	0.0947667	0.0300006	0.472272
TCGA-AG-3580-01	0.0835767	0.0871502	0.204204	0.137047	0.0511687	0.436853
TCGA-AG-3742-01	0.0858162	0.130356	0.181798	0.112284	0.0491301	0.440616
TCGA-AG-A002-01	0.0949903	0.0895093	0.228313	0.101811	0.026539	0.458838
TCGA-DC-6683-01	0.105792	0.124359	0.154761	0.106954	0.0626357	0.445499
TCGA-AF-6655-01	0.111321	0.100782	0.167009	0.122944	0.0388835	0.459061
TCGA-AG-A023-01	0.109532	0.165489	0.149344	0.105516	0.0416674	0.428452
TCGA-AG-3728-01	0.117191	0.215691	0.0707106	0.0791371	0.069646	0.447624
TCGA-AF-3400-01	0	0	0.0697769	0.411351	0	0.518872
TCGA-AF-2691-01	0.10356	0.110288	0.190557	0.0951945	0.0630355	0.437365
TCGA-CL-5918-01	0.0763492	0.138794	0.193292	0.121008	0.0309604	0.439597
TCGA-F5-6864-01	0.0890567	0.15417	0.154899	0.103288	0.0839851	0.414601
TCGA-AF-A56K-01	0.105367	0.141364	0.165997	0.117781	0.0648001	0.404691
TCGA-AG-4021-01	0.0800331	0.109732	0.164253	0.122434	0.102198	0.42135
TCGA-AG-A01N-01	0.0765702	0.150315	0.152755	0.115488	0.058169	0.446702
TCGA-DC-5869-01	0.114864	0.0895295	0.204249	0.101582	0.0733904	0.416386
TCGA-AG-3608-01	0.0932206	0.133949	0.168756	0.105675	0.0337859	0.464614
TCGA-DY-A0XA-01	0.121594	0.11784	0.177855	0.0978943	0.0626711	0.422146
TCGA-AG-3594-01	0.121818	0.0950173	0.185575	0.115108	0.0243042	0.458178
TCGA-EF-5831-01	0.120635	0.102123	0.175408	0.0968334	0.0791269	0.425873
TCGA-AG-3725-01	0.0763838	0.103881	0.209332	0.110616	0.0631793	0.436607
TCGA-EI-6514-01	0.101161	0.115199	0.175597	0.0929992	0.088979	0.426065
TCGA-CI-6624-01	0.0916803	0.123984	0.17338	0.103229	0.0812841	0.426443
TCGA-CI-6620-01	0.11537	0.134196	0.163399	0.104427	0.0416784	0.440929
TCGA-CI-6621-01	0.0564972	0.13615	0.169152	0.130229	0.0554631	0.452509
TCGA-EI-6510-01	0.136572	0.12862	0.177933	0.101142	0.039588	0.416145
TCGA-DY-A1DG-01	0.0861632	0.143183	0.176264	0.100985	0.07237	0.421035
TCGA-AG-A02X-01	0.0955569	0.133289	0.174818	0.108609	0.0136675	0.47406
TCGA-AG-3587-01	0.0839152	0.160353	0.151769	0.107242	0.0420843	0.454637
TCGA-AG-3894-01	0.083935	0.108376	0.191546	0.0938408	0.0330563	0.489246
TCGA-AG-3999-01	0.0886727	0.132811	0.162401	0.10226	0.0505576	0.463298
TCGA-AG-A00H-01	0.0931592	0.146331	0.139034	0.0968407	0.0551232	0.469511
TCGA-AF-A56N-01	0.0791692	0.126163	0.186082	0.108272	0.0569322	0.443381
TCGA-AG-A00C-01	0.09569	0.151486	0.17841	0.112711	0.00178755	0.459915
TCGA-EI-6885-01	0.0734459	0.119487	0.161935	0.105575	0.0792528	0.460303
TCGA-AG-3732-01	0.221677	0.144603	0.141432	0.0770911	0.0366525	0.378544
TCGA-AG-4007-01	0.12142	0.117669	0.152017	0.102044	0.0470196	0.459831
TCGA-AG-A016-01	0.0985209	0.152495	0.163519	0.111956	0.00198241	0.471527
TCGA-EI-6882-01	0.116997	0.0889662	0.195391	0.103071	0.0446485	0.450926
TCGA-AG-3575-01	0.0664765	0.0714466	0.196583	0.103599	0.0932863	0.468609
TCGA-AF-2693-01	0.0968693	0.125353	0.171422	0.113418	0.0547411	0.438198
TCGA-DC-6157-01	0.121995	0.127308	0.170287	0.105349	0.0812251	0.393835
TCGA-AF-4110-01	0.173739	0.0775043	0.176954	0.0890821	0.0479767	0.434744
TCGA-AG-3591-01	0.0757225	0.11399	0.198268	0.102728	0.0723076	0.436983
TCGA-EI-6881-01	0.0743423	0.104339	0.205949	0.122938	0.0386802	0.453752
TCGA-AG-A008-01	0.0982014	0.128115	0.181037	0.120226	0.0321919	0.440228
TCGA-AG-A015-01	0.089127	0.129477	0.179563	0.10499	0.0272082	0.469635
TCGA-AG-3892-01	0.227455	0.00643507	0.185931	0.0943135	0.00130324	0.484563
TCGA-G5-6233-01	0.0730349	0.136105	0.163406	0.104807	0.0836663	0.438981
TCGA-AG-3898-01	0.0690001	0.143713	0.158624	0.140809	0.055941	0.431914
TCGA-AG-3578-01	0.106889	0.118548	0.165391	0.123836	0.0617384	0.423597
TCGA-DC-6682-01	0.107232	0.135978	0.180633	0.0974983	0.0282185	0.45044
TCGA-F5-6813-01	0.0917687	0.127684	0.178735	0.103508	0.0862885	0.412016
TCGA-F5-6702-01	0.0927871	0.116584	0.143743	0.0929444	0.133476	0.420466
TCGA-CL-5917-01	0.0774786	0.111866	0.194306	0.117081	0.0741677	0.4251
TCGA-CL-4957-01	0.105905	0.132481	0.17455	0.110824	0.0326138	0.443627
TCGA-EI-6507-01	0.0244575	0.0714661	0.182649	0.154999	0.000284824	0.566144
TCGA-DC-4749-01	0.0888407	0.0979115	0.210631	0.12762	0.054007	0.42099
TCGA-AF-2690-01	0.225649	0.0596293	0.133891	0.0733371	0.0821289	0.425365
TCGA-EF-5830-01	0.0879595	0.118871	0.19731	0.0958204	0.0818842	0.418155
TCGA-AF-3911-01	0.0876064	0.117697	0.168724	0.0984362	0.0637072	0.46383
TCGA-DC-6155-01	0.0442528	0.165696	0.147623	0.164933	0.0910303	0.386464
TCGA-DC-6681-01	0.108855	0.153356	0.142466	0.0935583	0.0929718	0.408792
TCGA-AF-A56L-01	0.0869226	0.159425	0.156621	0.107955	0.0442222	0.444854
TCGA-CI-6623-01	0.0716619	0.105416	0.192293	0.164439	0.0638093	0.40238
TCGA-AH-6897-01	0.0757171	0.115067	0.184234	0.131353	0.0342771	0.459352
TCGA-AG-3574-01	0.0926793	0.125703	0.180087	0.100291	0.0270746	0.474165
TCGA-G5-6235-01	0.08981	0.10455	0.201396	0.126428	0.023908	0.453907
TCGA-AG-4005-01	0.0772953	0.16536	0.138419	0.107324	0.0481452	0.463456
TCGA-AG-3583-01	0.11056	0.105773	0.192689	0.129178	0.014365	0.447436
TCGA-AH-6547-01	0.15181	0.120825	0.158957	0.0872884	0.0641389	0.41698
TCGA-EI-7002-01	0.111172	0.135742	0.144301	0.105518	0.0322982	0.470969
TCGA-AG-A00Y-01	0.0789474	0.159893	0.131332	0.15701	0.0496847	0.423133
TCGA-EI-6506-01	0.137598	0.0902637	0.166834	0.0993358	0.00802861	0.49794
TCGA-AH-6643-01	0.0995399	0.0973794	0.215254	0.149412	0.0518483	0.386567
TCGA-AG-3890-01	0.145109	0.130801	0.156832	0.0849737	0.0339829	0.448302
TCGA-DY-A1DF-01	0.0759236	0.16664	0.160523	0.106926	0.019188	0.470799
TCGA-F5-6571-01	0.160621	0.112963	0.152686	0.076258	0.041292	0.45618
TCGA-AG-3882-01	0.0887239	0.203715	0.106357	0.0884881	0.06434	0.448376
TCGA-AG-3598-01	0.0821259	0.109001	0.204962	0.11306	0.0180793	0.472773
TCGA-F5-6811-01	0.0828646	0.136529	0.14661	0.111312	0.0963294	0.426356
TCGA-F5-6810-01	0.0899339	0.130961	0.181231	0.108811	0.0647096	0.424353
TCGA-F5-6464-01	0.0754869	0.1367	0.132974	0.0956935	0.0857909	0.473355
TCGA-CI-6619-01	0.100994	0.131938	0.164029	0.105834	0.0478862	0.44932
TCGA-AG-3602-01	0.0557352	0.102876	0.207958	0.128345	0.0896732	0.415412
TCGA-AF-2692-01	0.0906535	0.125931	0.177772	0.125873	0.043277	0.436493
TCGA-D7-5577-01	0	0.0343547	0.285171	0.114325	0.015052	0.551097
TCGA-D7-6818-01	0	0.133422	0.0618249	0.112239	0.137139	0.555376
TCGA-BR-4280-01	0.0350323	0.122512	0.166849	0.124522	0	0.551084
TCGA-D7-8572-01	0.0304803	0.131418	0.117023	0.122951	0.0151972	0.582929
TCGA-VQ-A91Z-01	0.0499381	0.198864	0.0686736	0.0941101	0	0.588414
TCGA-HU-A4HD-01	0.0587798	0.133866	0.136617	0.100021	0	0.570715
TCGA-D7-8573-01	0.105455	0.100757	0.172562	0.114361	0	0.506865
TCGA-BR-7959-01	0.00704193	0.142859	0.081817	0.109546	0.136181	0.522556
TCGA-BR-8679-01	0	0.205022	0.0107238	0.17335	0	0.610904
TCGA-CG-5726-01	0.101192	0.154701	0.105502	0.112792	0	0.525813
TCGA-BR-6453-01	0.142972	0.243133	0.123744	0.0649239	0.0840927	0.341134
TCGA-VQ-AA6A-01	0.120342	0.13493	0.138425	0.102809	0	0.503494
TCGA-HF-7132-01	0.0697265	0.17728	0.154715	0.0892256	0.00819922	0.500855
TCGA-BR-A4IV-01	0.0462576	0.180297	0.0693519	0.0742009	0.102629	0.527263
TCGA-CG-5718-01	0	0.124735	0.12566	0.16603	0.0380476	0.545527
TCGA-R5-A7ZR-01	0.0886412	0.17091	0.100756	0.101803	0	0.53789
TCGA-BR-8680-01	0.113071	0.152777	0.103164	0.0917058	0	0.539282
TCGA-VQ-A8P2-01	0.103986	0.145631	0.129032	0.0963979	0	0.524954
TCGA-CD-8533-01	0.0920587	0.184459	0.0926629	0.0996071	0	0.531212
TCGA-RD-A8N2-01	0.0751821	0.200559	0.0768805	0.0622604	0.108329	0.476789
TCGA-VQ-A92D-01	0.131647	0.156144	0.0987135	0.0989188	0	0.514577
TCGA-HU-A4GT-01	0.0805819	0.133376	0.139966	0.10972	0	0.536356
TCGA-ZA-A8F6-01	0.0202763	0.12372	0.127674	0.0874851	0.0955912	0.545254
TCGA-D7-A74A-01	0.0926668	0.107461	0.192875	0.098871	0	0.508126
TCGA-IN-A7NR-01	0.0794582	0.130922	0.197505	0.0989141	0	0.4932
TCGA-HU-A4H2-01	0.0536475	0.0956417	0.208266	0.109846	0	0.532599
TCGA-BR-6456-01	0.0181984	0.136902	0.124179	0.0957629	0.0946307	0.530326
TCGA-CG-4442-01	0.118702	0.135018	0.0752484	0.125381	0	0.545651
TCGA-CD-8524-01	0.0524561	0.15405	0.133441	0.107285	0.0225834	0.530184
TCGA-VQ-A8PO-01	0.0920808	0.143115	0.177336	0.0990316	0	0.488436
TCGA-BR-7717-01	0.0766778	0.169784	0.107337	0.110886	0	0.535315
TCGA-CG-4475-01	0	0.0757256	0.141444	0.136728	0.0786492	0.567453
TCGA-BR-4369-01	0.0481652	0.159236	0.160019	0.0833335	0.0701715	0.479075
TCGA-HU-A4GP-01	0.125539	0.158943	0.104876	0.0975468	0	0.513095
TCGA-VQ-A94R-01	0.0656701	0.196236	0.0928162	0.089533	0.0348316	0.520913
TCGA-VQ-A91E-01	0.145082	0.143426	0.158331	0.104749	0	0.448412
TCGA-HU-A4GD-01	0.0816298	0.204999	0.0679169	0.129125	0	0.516329
TCGA-FP-8211-01	0.0811902	0.131254	0.212871	0.0985346	0	0.47615
TCGA-D7-A747-01	0.115554	0.183676	0.120683	0.0728421	0.0761922	0.431053
TCGA-KB-A93G-01	0.0562354	0.215093	0.0807631	0.116881	0	0.531028
TCGA-RD-A8MV-01	0	0.15201	0.187822	0.179145	0	0.481022
TCGA-BR-4256-01	0	0.0497586	0.158825	0.173502	0.0925064	0.525408
TCGA-FP-7735-01	0.0106476	0.18248	0.162419	0.100807	0.0304888	0.513158
TCGA-VQ-A8PK-01	0.0437549	0.146387	0.126861	0.113146	0	0.569851
TCGA-BR-7707-01	0.0309307	0.055565	0.247456	0.134504	0	0.531544
TCGA-IN-A6RS-01	0.00391838	0.10179	0.244553	0.122393	0	0.527346
TCGA-D7-6519-01	0.0815169	0.111165	0.147311	0.0974437	0	0.562563
TCGA-CG-4440-01	0.0272242	0.142203	0.0596178	0.117676	0.0135876	0.639691
TCGA-BR-8487-01	0.0850874	0.131163	0.132657	0.0973357	0.000709646	0.553047
TCGA-VQ-A94U-01	0.0372968	0.149657	0.159027	0.108035	0.0262833	0.519701
TCGA-CG-5717-01	0.0680657	0.167446	0.140433	0.116395	0	0.50766
TCGA-BR-A4CR-01	0.0875715	0.198669	0.0511318	0.0977164	0	0.564912
TCGA-HU-8249-01	0.00514264	0.1188	0.225493	0.128556	0	0.522008
TCGA-BR-6454-01	0	0.113827	0.297577	0.119804	0	0.468792
TCGA-BR-7722-01	0.0884006	0.135941	0.138274	0.0978769	0.0292605	0.510247
TCGA-HU-A4HB-01	0.22068	0.199992	0.105215	0.0805161	0.0017128	0.391885
TCGA-BR-7958-01	0	0.034582	0.337377	0.126437	0	0.501604
TCGA-BR-7197-01	0.0730349	0.136333	0.132744	0.10432	0	0.553567
TCGA-VQ-A94P-01	0.119284	0.137994	0.118038	0.0675757	0.100578	0.45653
TCGA-D7-8575-01	0.0688558	0.0963665	0.157496	0.124564	0.0297687	0.522949
TCGA-VQ-A8E0-01	0.0426057	0.132396	0.137742	0.120194	0.0370583	0.530005
TCGA-VQ-A8PP-01	0.0999377	0.126144	0.146866	0.100121	0	0.526931
TCGA-BR-8372-01	0.000597949	0.0841032	0.212214	0.114187	0.00974177	0.579157
TCGA-VQ-A91Y-01	0.0640228	0.157874	0.142543	0.0942689	0.0853086	0.455983
TCGA-IN-A6RL-01	0.0844269	0.123861	0.166287	0.107774	0.0284609	0.48919
TCGA-CG-5732-01	0.0956654	0.138616	0.179318	0.116166	0	0.470234
TCGA-RD-A8MW-01	0.0398599	0.0807716	0.178095	0.129341	0.0916158	0.480317
TCGA-KB-A6F7-01	0	0.0419198	0.27772	0.110116	0.0240521	0.546191
TCGA-BR-8382-01	0	0.134389	0.132769	0.179721	0	0.553121
TCGA-BR-8060-01	0.0231491	0.0878718	0.173861	0.140696	0.0421569	0.532265
TCGA-HU-A4GF-01	0.0364402	0.178693	0.103425	0.142613	0	0.538829
TCGA-R5-A7ZI-01	0	0.0614753	0.333606	0.100399	0.0224462	0.482074
TCGA-BR-8588-01	0.0461758	0.125346	0.168048	0.123112	0.0573963	0.479922
TCGA-CD-5801-01	0	0	0.426653	0.0954331	0	0.477914
TCGA-CD-5800-01	0.0366846	0.190843	0.0872495	0.117097	0	0.568126
TCGA-CG-4462-01	0	0.0663512	0.110022	0.182161	0.185473	0.455993
TCGA-CD-8530-01	0.0144779	0.120395	0.173968	0.105932	0.10054	0.484687
TCGA-VQ-A8PX-01	0.116031	0.179443	0.11137	0.09876	0	0.494395
TCGA-D7-8578-01	0.0747241	0.136678	0.109809	0.101834	0.0825388	0.494416
TCGA-BR-6458-01	0.00429828	0.122563	0.173426	0.0926376	0.0633695	0.543706
TCGA-VQ-A8PB-01	0.0659917	0.153974	0.122863	0.118117	0	0.539054
TCGA-D7-6822-01	0.0519882	0.160647	0.0945145	0.131213	0	0.561637
TCGA-BR-8284-01	0.0411251	0.0941925	0.260874	0.0931415	0.070354	0.440313
TCGA-3M-AB47-01	0.0793259	0.193021	0.149677	0.0793636	0.124188	0.374423
TCGA-BR-8381-01	0.0386549	0.144145	0.190552	0.0985219	0.0539509	0.474176
TCGA-BR-4191-01	0	0.0924134	0.161939	0.113254	0.159977	0.472417
TCGA-MX-A666-01	0.217786	0.2288	0.035741	0.0803305	0	0.437343
TCGA-CD-A486-01	0.0376195	0.136621	0.0984236	0.119895	0.0176394	0.589801
TCGA-BR-8077-01	0	0.0991311	0.254793	0.137361	0.00128616	0.507429
TCGA-MX-A663-01	0.0297911	0.162578	0.104715	0.111919	0.0726989	0.518298
TCGA-R5-A7O7-01	0	0.107182	0.254362	0.133732	0	0.504724
TCGA-VQ-A8DZ-01	0.0483053	0.148278	0.117774	0.115209	0	0.570434
TCGA-BR-A44T-01	0.210453	0.241673	0.104392	0.0647067	0.0518014	0.326974
TCGA-HU-A4H6-01	0.0916295	0.183118	0.106582	0.15522	0	0.46345
TCGA-BR-A4CS-01	0	0.135807	0.0935835	0.178009	0.0674303	0.525171
TCGA-CG-4438-01	0	0.0646567	0.24287	0.0999182	0.0396936	0.552862
TCGA-RD-A7BW-01	0	0.0671672	0.280731	0.0890556	0.135693	0.427353
TCGA-D7-8570-01	0	0.0888159	0.212196	0.116826	0.0430718	0.539091
TCGA-BR-4368-01	0.0134685	0.112295	0.193233	0.113716	0.02961	0.537677
TCGA-CG-5720-01	0	0.125457	0.14807	0.163615	0.029842	0.533016
TCGA-D7-8579-01	0.058708	0.150818	0.117915	0.132953	0.050052	0.489554
TCGA-IN-A6RO-01	0.0980893	0.176469	0.0955086	0.104547	0	0.525385
TCGA-VQ-AA69-01	0.0480226	0.109116	0.187603	0.121326	0	0.533933
TCGA-IP-7968-01	0.0339426	0.0724541	0.240095	0.106651	0.010191	0.536667
TCGA-BR-8371-01	0.126609	0.240605	0.0781526	0.0841642	0.127491	0.342978
TCGA-KB-A93J-01	0	0.10922	0.183869	0.0922807	0.0226524	0.591978
TCGA-D7-A4YU-01	0.0667031	0.17374	0.1228	0.113843	0.0217588	0.501155
TCGA-BR-6705-01	0.0275401	0.194245	0.119267	0.0819071	0.114042	0.462999
TCGA-BR-6803-01	0.033621	0.196483	0.14148	0.0830443	0.0662812	0.47909
TCGA-D7-A6EX-01	0.112643	0.190157	0.089839	0.078989	0	0.528371
TCGA-HU-A4G9-01	0.146749	0.169235	0.0832147	0.0973704	0	0.503431
TCGA-BR-6564-01	0	0.201387	0.115255	0.113199	0.110857	0.459301
TCGA-D7-A4YX-01	0.0278358	0.0952943	0.238391	0.112779	0	0.5257
TCGA-CG-4441-01	0	0.0937649	0.142478	0.174686	0.0153345	0.573737
TCGA-VQ-A8DV-01	0.0879304	0.171964	0.092507	0.0957301	0	0.551869
TCGA-CG-5719-01	0.0185143	0.126279	0.14381	0.109157	0.0772388	0.525001
TCGA-HU-A4GX-01	0	0.0669409	0.295404	0.117976	0	0.519679
TCGA-BR-8483-01	0.0571373	0.105019	0.163042	0.124583	0	0.550219
TCGA-VQ-A8PC-01	0.0839593	0.170148	0.0841404	0.125133	0.09911	0.437509
TCGA-CD-8526-01	0.0441585	0.195418	0.103646	0.0994109	0.0104144	0.546952
TCGA-BR-8380-01	0.0552776	0.184627	0.0798348	0.080631	0.15051	0.449119
TCGA-VQ-A8PQ-01	0.15926	0.329909	0.0848775	0.0644102	0.0214616	0.340082
TCGA-BR-8291-01	0.0146523	0.13231	0.147224	0.0832861	0.172546	0.449981
TCGA-HU-A4GQ-01	0.0108236	0.126478	0.13709	0.120601	0	0.605007
TCGA-BR-8081-01	0	0.0858748	0.211401	0.130194	0.0107933	0.561736
TCGA-HU-A4H4-01	0	0.130337	0.217142	0.131812	0	0.520708
TCGA-VQ-A91K-01	0.0465437	0.151991	0.112191	0.112189	0	0.577085
TCGA-R5-A7ZE-01	0.0963894	0.160302	0.099459	0.0969789	0	0.54687
TCGA-BR-4367-01	0	0.0799548	0.147983	0.125508	0.0831419	0.563412
TCGA-BR-8297-01	0.0785239	0.177827	0.120005	0.0865809	0.074722	0.462341
TCGA-BR-8687-01	0.0947919	0.143289	0.124715	0.103398	0.0375444	0.496262
TCGA-BR-8683-01	0.056805	0.145901	0.153314	0.10724	0.00782822	0.528913
TCGA-F1-A72C-01	0.0227774	0.14679	0.158707	0.131243	0.094349	0.446134
TCGA-VQ-A8PM-01	0.134865	0.163731	0.145249	0.0862083	0	0.469946
TCGA-VQ-A925-01	0.0768503	0.0934459	0.214537	0.104553	0	0.510614
TCGA-IN-7808-01	0.159506	0.260365	0.141997	0.0758561	0.0126394	0.349636
TCGA-HU-A4G8-01	0.0805225	0.169627	0.111569	0.12033	0	0.517952
TCGA-CD-A48A-01	0.0352138	0.124112	0.123166	0.110128	0	0.607381
TCGA-B7-A5TJ-01	0.0646473	0.14553	0.136045	0.100259	0	0.553519
TCGA-IN-8462-01	0.0939927	0.136357	0.138026	0.108386	0.0142529	0.508986
TCGA-BR-4294-01	0.0255772	0.181299	0.0582141	0.070503	0	0.664407
TCGA-BR-A4J4-01	0.108246	0.102598	0.15893	0.102869	0	0.527357
TCGA-IN-7806-01	0.103086	0.171029	0.113217	0.101979	0.0114068	0.499282
TCGA-VQ-AA6F-01	0.110675	0.147766	0.155862	0.10623	0	0.479467
TCGA-BR-A4J8-01	0.0840713	0.176122	0.102554	0.0964777	0.059925	0.480851
TCGA-BR-6707-01	0	0.0391263	0.378472	0.0949613	0	0.48744
TCGA-HU-A4GC-01	0.0640634	0.136033	0.18274	0.101816	0	0.515348
TCGA-BR-8682-01	0.0766637	0.168083	0.0932412	0.0790528	0.0699595	0.512999
TCGA-HU-A4H0-01	0.0189581	0.118695	0.220138	0.108795	0.00280034	0.530614
TCGA-BR-8677-01	0	0.154759	0.218634	0.10843	0.0615043	0.456674
TCGA-FP-7998-01	0	0.116784	0.223076	0.0945468	0.0639068	0.501686
TCGA-D7-8574-01	0.176533	0.212883	0.117327	0.0666356	0.0559317	0.37069
TCGA-VQ-A8P5-01	0	0.115484	0.160256	0.145526	0.0196503	0.559084
TCGA-CD-8532-01	0.0664727	0.152352	0.18752	0.105819	0.00841839	0.479417
TCGA-VQ-A91A-01	0.0237946	0.0997633	0.119745	0.149162	0.0701902	0.537345
TCGA-CG-4466-01	0.0911211	0.151755	0.120468	0.127756	0	0.508899
TCGA-BR-8369-01	0.117587	0.185875	0.100962	0.0888406	0.0128758	0.493859
TCGA-D7-A4Z0-01	0.103346	0.125612	0.155284	0.120905	0	0.494853
TCGA-CG-4444-01	0.032482	0.140213	0.113268	0.131937	0.0425604	0.539539
TCGA-BR-7715-01	0.0341632	0.151127	0.103165	0.104227	0.0168231	0.590495
TCGA-BR-8590-01	0.0583623	0.140587	0.127112	0.0868541	0.121113	0.465972
TCGA-VQ-A927-01	0.117927	0.156444	0.133225	0.105182	0	0.487221
TCGA-D7-A6EV-01	0.0927449	0.168105	0.0852755	0.103939	0	0.549935
TCGA-D7-A748-01	0	0.0751328	0.121425	0.100267	0.206094	0.497081
TCGA-VQ-A91U-01	0.0695734	0.164991	0.152769	0.0965626	0	0.516104
TCGA-IN-8663-01	0.0842784	0.161791	0.0918129	0.1094	0	0.552718
TCGA-CG-4477-01	0.0634711	0.0892358	0.185533	0.135464	0.102694	0.423602
TCGA-CG-4460-01	0.0180676	0.132646	0.130689	0.123086	0.0391217	0.556389
TCGA-RD-A8N5-01	0	0.0702758	0.133252	0.229747	0.169574	0.397151
TCGA-BR-4363-01	0.0547346	0.105649	0.158577	0.0960767	0.0702452	0.514718
TCGA-D7-A6EZ-01	0	0.0261697	0.273423	0.143468	0	0.55694
TCGA-IN-A7NT-01	0	0.0928745	0.141798	0.134908	0	0.63042
TCGA-VQ-A8PD-01	0.134531	0.188807	0.157296	0.0944751	0.0289424	0.395949
TCGA-VQ-A924-01	0.0114089	0.196677	0.0908835	0.139451	0	0.561579
TCGA-IN-A6RN-01	0.0997977	0.148632	0.14554	0.101894	0	0.504137
TCGA-HU-A4GH-01	0.0955531	0.127469	0.172901	0.108206	0	0.495872
TCGA-HU-A4H8-01	0.107208	0.171026	0.0984584	0.113351	0	0.509956
TCGA-BR-4370-01	0	0.0715521	0.169225	0.178733	0.0445605	0.53593
TCGA-FP-A9TM-01	0.274357	0.218816	0.049397	0.0827741	0	0.374656
TCGA-BR-6852-01	0	0.0504793	0.316389	0.112521	0.000672233	0.519938
TCGA-CG-4476-01	0.0400276	0.117015	0.161624	0.0900659	0.124696	0.466572
TCGA-VQ-A8DU-01	0.0932267	0.1545	0.138226	0.0998073	0	0.51424
TCGA-CG-4443-01	0.0246785	0.0776382	0.181093	0.0988541	0.0141261	0.60361
TCGA-BR-4257-01	0	0.100376	0.138733	0.121568	0.0603965	0.578927
TCGA-D7-6815-01	0.0645004	0.149095	0.113982	0.101803	0	0.57062
TCGA-BR-A4J9-01	0.0838642	0.213666	0.08995	0.0736013	0.0965637	0.442354
TCGA-BR-7723-01	0.0486896	0.16045	0.120848	0.0909121	0.00615343	0.572947
TCGA-RD-A8NB-01	0.030345	0.16003	0.164205	0.127519	0	0.517901
TCGA-D7-6520-01	0	0.113659	0.152617	0.130107	0.0241024	0.579514
TCGA-BR-6452-01	0.0226001	0.113792	0.18845	0.107027	0	0.568131
TCGA-IN-A6RR-01	0.10173	0.124691	0.181032	0.10009	0	0.492457
TCGA-VQ-A928-01	0.048533	0.188803	0.0562308	0.113251	0	0.593182
TCGA-BR-A4J7-01	0	0.0947893	0.300904	0.0881086	0.0570052	0.459193
TCGA-BR-8059-01	0.0416223	0.0792464	0.184466	0.101524	0.0306686	0.562472
TCGA-VQ-A8DT-01	0.093717	0.119616	0.162011	0.114312	0	0.510344
TCGA-VQ-A8P8-01	0.178484	0.163455	0.113171	0.0916567	0	0.453234
TCGA-VQ-A91D-01	0.0442227	0.138266	0.107644	0.138877	0	0.570991
TCGA-BR-7901-01	0.0193159	0.133151	0.131582	0.115041	0.082384	0.518526
TCGA-CG-4306-01	0.0384955	0.0732215	0.164428	0.187781	0.0562237	0.479851
TCGA-BR-6565-01	0.0118727	0.12048	0.184281	0.105155	0.0149154	0.563295
TCGA-CG-4436-01	0	0.0458795	0.188975	0.249695	0	0.515451
TCGA-HU-A4G2-01	0.0446133	0.100824	0.236103	0.107815	0	0.510645
TCGA-VQ-A94T-01	0.0645198	0.145227	0.120996	0.0795864	0	0.589671
TCGA-VQ-A8PU-01	0.11078	0.144513	0.11437	0.0989193	0	0.531417
TCGA-VQ-A8PJ-01	0.0761946	0.162613	0.119137	0.100304	0	0.541751
TCGA-IN-A6RI-01	0.0859528	0.150592	0.131301	0.105535	0	0.526618
TCGA-IN-A7NU-01	0.0107978	0.04916	0.26002	0.128275	0.0669469	0.4848
TCGA-CD-8534-01	0.0544198	0.155775	0.163871	0.105487	0	0.520448
TCGA-VQ-AA68-01	0.078725	0.146037	0.161351	0.0984775	0	0.51541
TCGA-FP-8631-01	0.118128	0.157244	0.113914	0.124826	0.0676459	0.418242
TCGA-D7-A6EY-01	0.0881709	0.161219	0.153049	0.110485	0	0.487075
TCGA-D7-6526-01	0.0299828	0.124176	0.153426	0.120279	0	0.572137
TCGA-BR-8364-01	0.0529108	0.14671	0.124757	0.0774834	0.147614	0.450524
TCGA-BR-6563-01	0.0402245	0.14844	0.210113	0.0843484	0.106139	0.410735
TCGA-CG-5721-01	0	0	0.372512	0.110494	0.00402951	0.512965
TCGA-HF-7133-01	0.00332084	0.138545	0.134363	0.124029	0.0173345	0.582408
TCGA-CD-8528-01	0.0555431	0.178457	0.0455867	0.120502	0.00456187	0.59535
TCGA-HU-8244-01	0.110093	0.146796	0.137754	0.0991644	0	0.506192
TCGA-CD-5813-01	0	0.111915	0.199556	0.0873655	0.0964757	0.504687
TCGA-BR-8484-01	0.0582669	0.153501	0.152921	0.100889	0.0372731	0.497148
TCGA-BR-6457-01	0.0310435	0.165591	0.142711	0.0803968	0.123232	0.457026
TCGA-FP-7916-01	0.0230944	0.124241	0.19685	0.106099	0.0361565	0.513559
TCGA-BR-4187-01	0	0.103682	0.12542	0.11717	0.16815	0.485578
TCGA-KB-A93H-01	0	0.102367	0.0982659	0.213523	0.154671	0.431173
TCGA-BR-8592-01	0.0969415	0.198521	0.0851935	0.0816416	0.13697	0.400733
TCGA-BR-4366-01	0.0784947	0.127153	0.0871262	0.109518	0.109688	0.488021
TCGA-BR-7851-01	0.0485267	0.158429	0.116395	0.105225	0	0.571424
TCGA-SW-A7EA-01	0	0.0656026	0.246379	0.153207	0	0.534811
TCGA-CD-5803-01	0	0.198052	0.204692	0.105829	0.0426987	0.448728
TCGA-D7-6525-01	0	0.0642358	0.17669	0.135698	0.0244465	0.59893
TCGA-RD-A8N9-01	0.0331101	0.133707	0.168213	0.0761482	0.0526422	0.536179
TCGA-BR-4279-01	0	0.017045	0.209255	0.141675	0.139797	0.492228
TCGA-BR-8080-01	0.062747	0.11966	0.167412	0.110343	0.0984497	0.441388
TCGA-BR-A4PF-01	0.00448132	0.116047	0.163552	0.160125	0.0112543	0.544541
TCGA-HU-A4G3-01	0.0978099	0.142664	0.119355	0.106589	0	0.533583
TCGA-CD-8531-01	0.35181	0.110916	0.12568	0.0726732	0.00375296	0.335168
TCGA-R5-A7ZF-01	0.0459502	0.158561	0.133353	0.104616	0	0.557519
TCGA-CD-A487-01	0.0583683	0.143863	0.0980119	0.163237	0.0181469	0.518373
TCGA-BR-8384-01	0.0572544	0.17812	0.133574	0.0910234	0.155468	0.38456
TCGA-VQ-A922-01	0.0668823	0.204352	0.0536468	0.0929605	0.0262534	0.555905
TCGA-B7-A5TI-01	0.0711758	0.143047	0.139741	0.0970078	0.0463756	0.502653
TCGA-BR-8368-01	0.0466169	0.169472	0.192001	0.0980847	0	0.493825
TCGA-BR-4357-01	0	0.0611726	0.190183	0.106331	0.051872	0.590441
TCGA-BR-4371-01	0.0429223	0.164134	0.14631	0.130764	0	0.51587
TCGA-VQ-A91N-01	0.105739	0.170686	0.120405	0.080399	0	0.522771
TCGA-VQ-AA6J-01	0.0659337	0.177418	0.107754	0.100661	0	0.548233
TCGA-CG-5724-01	0.00238373	0.150219	0.0872448	0.1358	0.0020456	0.622308
TCGA-VQ-A94O-01	0.0525163	0.196189	0.14587	0.101109	0	0.504316
TCGA-BR-8591-01	0.056813	0.14273	0.134647	0.115834	0	0.549976
TCGA-VQ-AA64-01	0.067831	0.136937	0.136854	0.0965307	0.0704175	0.49143
TCGA-FP-8099-01	0.0344768	0.143424	0.090846	0.117884	0	0.613369
TCGA-F1-A448-01	0.0140489	0.0586746	0.207038	0.203863	0.0201469	0.496228
TCGA-VQ-A91V-01	0.0834118	0.131829	0.153166	0.128006	0	0.503587
TCGA-RD-A8N0-01	0.17301	0.14655	0.203273	0.077789	0.0247208	0.374657
TCGA-FP-A4BF-01	0.0096845	0.0312817	0.283954	0.115424	0.11893	0.440726
TCGA-FP-A8CX-01	0.0890946	0.144488	0.148296	0.11627	0	0.501852
TCGA-RD-A7BS-01	0.0940108	0.12097	0.167712	0.125497	0.047764	0.444047
TCGA-BR-7716-01	0.00170057	0.145616	0.198323	0.0979993	0.0300789	0.526282
TCGA-BR-8366-01	0	0.0588859	0.278672	0.111092	0.0474629	0.503887
TCGA-VQ-AA6G-01	0.0742752	0.077991	0.194708	0.123415	0	0.529611
TCGA-CG-4465-01	0	0.0827376	0.11424	0.135208	0.108668	0.559147
TCGA-HU-A4H5-01	0.0967735	0.143975	0.125775	0.11605	0	0.517427
TCGA-CG-4437-01	0	0.0816651	0.182092	0.135265	0.0586355	0.542342
TCGA-CD-5804-01	0	0.152712	0.121638	0.128569	0.0119753	0.585105
TCGA-F1-6875-01	0.111075	0.188994	0.0340448	0.08475	0	0.581136
TCGA-HF-A5NB-01	0.0782503	0.122784	0.163885	0.112542	0	0.522538
TCGA-BR-8365-01	0.0693477	0.16038	0.14662	0.0825708	0.157119	0.383962
TCGA-D7-A6F0-01	0	0.15036	0.152848	0.101811	0.0412548	0.553726
TCGA-BR-7957-01	0.0661795	0.15807	0.097806	0.0849737	0.0951574	0.497814
TCGA-IN-AB1X-01	0	0.190096	0.178435	0.166697	0	0.464771
TCGA-BR-8678-01	0.0322467	0.16757	0.091184	0.130647	0	0.578353
TCGA-D7-6528-01	0.079041	0.155637	0.12028	0.117972	0	0.52707
TCGA-HU-8238-01	0.0107312	0.0987476	0.186079	0.160096	0	0.544347
TCGA-BR-8367-01	0.0676491	0.169586	0.104431	0.0849918	0.124025	0.449318
TCGA-BR-7196-01	0.033374	0.142753	0.164701	0.102611	0.127774	0.428787
TCGA-FP-7829-01	0.0550634	0.135444	0.106502	0.104871	0	0.598119
TCGA-B7-A5TN-01	0.0681214	0.134948	0.113477	0.101952	0.0857003	0.495802
TCGA-VQ-A8E3-01	0.0209793	0.164148	0.205056	0.134307	0	0.47551
TCGA-CG-5725-01	0.0961477	0.193066	0.072152	0.0881165	0	0.550518
TCGA-CG-4305-01	0	0.100367	0.217546	0.100134	0.0867142	0.495239
TCGA-BR-6455-01	0.0192692	0.173831	0.15881	0.10319	0.0183864	0.526513
TCGA-BR-6802-01	0.00535395	0.133001	0.236707	0.121084	0.0138425	0.490012
TCGA-BR-6709-01	0	0.1055	0.237687	0.105312	0.23179	0.319711
TCGA-B7-A5TK-01	0	0	0.371385	0.132751	0.000867815	0.494996
TCGA-CD-A4MH-01	0.07415	0.182495	0.107566	0.110021	0	0.525768
TCGA-BR-6710-01	0.0943618	0.165946	0.176888	0.117547	0.0788109	0.366446
TCGA-CD-A4MG-01	0.0624159	0.156705	0.0798516	0.112873	0.0190956	0.569059
TCGA-D7-6522-01	0.0105072	0.189483	0.156848	0.0843754	0.0880745	0.470711
TCGA-F1-6177-01	0.0650758	0.187393	0.0640674	0.114572	0	0.568891
TCGA-BR-4201-01	0	0.074173	0.142502	0.156094	0.127636	0.499595
TCGA-BR-4361-01	0.0322616	0.0941808	0.165415	0.102661	0.117876	0.487605
TCGA-FP-8209-01	0.121642	0.208665	0.128709	0.0719955	0.129447	0.339541
TCGA-FP-8210-01	0.112247	0.178108	0.15142	0.0724642	0.061698	0.424064
TCGA-HU-8604-01	0	0.0916194	0.237798	0.136656	0.000136328	0.533791
TCGA-CG-4301-01	0.0809415	0.0946193	0.130739	0.105224	0.108233	0.480244
TCGA-RD-A8N1-01	0.0740712	0.169599	0.195444	0.0865074	0.0325468	0.441832
TCGA-BR-A44U-01	0.0635269	0.165497	0.0886733	0.108875	0	0.573428
TCGA-CG-4469-01	0	0.100671	0.113801	0.186213	0.0150213	0.584295
TCGA-VQ-A8PH-01	0.0745746	0.188856	0.175074	0.0844032	0	0.477092
TCGA-D7-8576-01	0.0596768	0.118479	0.131924	0.104256	0.0227766	0.562888
TCGA-VQ-AA6K-01	0.0381951	0.128809	0.202976	0.118552	0.0268922	0.484575
TCGA-HU-8602-01	0	0.0873661	0.12939	0.200413	0	0.582832
TCGA-BR-8485-01	0.0770231	0.150356	0.179019	0.0962588	0.0165387	0.480805
TCGA-VQ-A8E7-01	0.0644098	0.151125	0.136379	0.106634	0	0.541452
TCGA-HU-A4GJ-01	0.273037	0.215995	0.127677	0.0673739	0.0127698	0.303148
TCGA-BR-8686-01	0.080917	0.140096	0.199443	0.0913719	0.138731	0.349441
TCGA-BR-8589-01	0	0.0537095	0.335464	0.108297	0.0456367	0.456892
TCGA-RD-A8N6-01	0.0828748	0.184551	0.0916648	0.0890362	0.12215	0.429724
TCGA-D7-6524-01	0	0.0749773	0.157243	0.203387	0.0100443	0.554348
TCGA-CG-5722-01	0.0116318	0.105437	0.260507	0.145597	0	0.476827
TCGA-BR-8486-01	0.0441354	0.174258	0.175094	0.10682	0.0167756	0.482917
TCGA-VQ-A8PE-01	0.097499	0.174108	0.116855	0.0882087	0	0.523329
TCGA-CD-8535-01	0.0553401	0.176193	0.0366004	0.0965851	0	0.635281
TCGA-VQ-A91X-01	0.105361	0.136399	0.137464	0.092824	0	0.527951
TCGA-BR-A4J5-01	0.0520636	0.125825	0.147161	0.0924634	0.0766557	0.505831
TCGA-CD-5798-01	0	0.0991844	0.144839	0.105293	0.0614912	0.589192
TCGA-ZQ-A9CR-01	0.0296587	0.12615	0.198725	0.129374	0.0685515	0.44754
TCGA-D7-6527-01	0.051258	0.115715	0.166319	0.1159	0	0.550807
TCGA-BR-8289-01	0.0626244	0.157494	0.0847935	0.0896828	0.0205712	0.584834
TCGA-BR-6801-01	0.0350309	0.219147	0.0479574	0.0750755	0	0.622789
TCGA-CG-5734-01	0.0268673	0.0800293	0.249415	0.121311	0	0.522377
TCGA-R5-A805-01	0	0.0819383	0.0813229	0.257705	0.0154579	0.563576
TCGA-3M-AB46-01	0.121508	0.164386	0.0816032	0.105592	0	0.526911
TCGA-CG-5716-01	0.140509	0.184714	0.122193	0.0864349	0	0.466149
TCGA-BR-4253-01	0	0.00978284	0.338731	0.118277	0.0519176	0.481292
TCGA-BR-8058-01	0.0565006	0.139992	0.172054	0.104201	0.0793809	0.447871
TCGA-VQ-A8P3-01	0.00375913	0.123737	0.212688	0.0883722	0	0.571444
TCGA-HU-A4H3-01	0.0367217	0.102676	0.191645	0.139195	0	0.529762
TCGA-BR-4267-01	0.0805583	0.0645489	0.169502	0.149703	0.0136997	0.521988
TCGA-VQ-A8E2-01	0.0548714	0.178429	0.139747	0.104394	0.0835093	0.43905
TCGA-MX-A5UG-01	0.16874	0.1754	0.111014	0.0935218	0.0916137	0.35971
TCGA-RD-A8N4-01	0.0835238	0.198054	0.105646	0.0924708	0.113691	0.406614
TCGA-IN-A6RJ-01	0.128401	0.174477	0.0821683	0.106684	0	0.50827
TCGA-CG-5723-01	0	0	0.268786	0.168333	0	0.562881
TCGA-VQ-AA6D-01	0.0475105	0.209641	0.0244285	0.109813	0	0.608607
TCGA-F1-6874-01	0.0140098	0.131163	0.148532	0.171529	0.0134899	0.521276
TCGA-CG-4304-01	0.0371413	0.120887	0.136333	0.14371	0.0546166	0.507313
TCGA-VQ-A923-01	0.0382305	0.181874	0.230158	0.0872172	0	0.46252
TCGA-VQ-A8PF-01	0.00932995	0.137307	0.207663	0.102837	0.0904438	0.452419
TCGA-BR-8361-01	0.0593042	0.113145	0.215752	0.127699	0	0.4841
TCGA-RD-A7BT-01	0.0764748	0.153467	0.163546	0.104653	0	0.501858
TCGA-MX-A5UJ-01	0.0723453	0.192458	0.0797219	0.101507	0.0267024	0.527265
TCGA-VQ-A91Q-01	0.0699593	0.172463	0.0880116	0.110114	0.0313332	0.52812
TCGA-D7-5578-01	0.0304733	0.149483	0.144251	0.105913	0	0.569881
TCGA-SW-A7EB-01	0.0880744	0.162921	0.183545	0.0846527	0	0.480807
TCGA-HU-A4GU-01	0.0297256	0.111659	0.180768	0.124838	0	0.553009
TCGA-D7-6521-01	0.0233588	0.162603	0.14536	0.0941176	0.0605991	0.513961
TCGA-IN-AB1V-01	0.119158	0.170008	0.130013	0.102432	0	0.47839
TCGA-HF-7134-01	0.0788089	0.148062	0.12071	0.132454	0	0.519965
TCGA-CD-A48C-01	0.0601369	0.083334	0.179412	0.108618	0	0.5685
TCGA-HU-8610-01	0	0.0946427	0.166467	0.196134	0	0.542756
TCGA-BR-8373-01	0.0815443	0.181352	0.0762505	0.103668	0.0475489	0.509636
TCGA-EQ-8122-01	0.0479315	0.177328	0.0796046	0.119827	0	0.575308
TCGA-B7-5818-01	0	0.109145	0.19818	0.106568	0.0196793	0.566428
TCGA-D7-A6F2-01	0.042784	0.1869	0.117052	0.0882472	0.0105326	0.554485
TCGA-RD-A7C1-01	0	0.00921476	0.26699	0.200036	0	0.523759
TCGA-HF-7131-01	0.0491841	0.0829844	0.214194	0.12127	0	0.532367
TCGA-CD-5799-01	0.0648597	0.158111	0.0794394	0.11375	0	0.58384
TCGA-VQ-A91S-01	0.0940527	0.14186	0.160288	0.102453	0	0.501346
TCGA-HU-A4GY-01	0.0942711	0.228207	0.118547	0.0706232	0.0858291	0.402523
TCGA-HU-8608-01	0.036714	0.122104	0.186776	0.101514	0	0.552892
TCGA-CD-A489-01	0.0809559	0.142071	0.147693	0.0832044	0.0920116	0.454064
TCGA-BR-6566-01	0	0.0903562	0.187237	0.119164	0.0105453	0.592697
TCGA-BR-A4J6-01	0.0788763	0.101147	0.185548	0.0981587	0.00117554	0.535094
TCGA-BR-8286-01	0.0404403	0.0892242	0.211969	0.116907	0.0267615	0.514698
TCGA-CD-8529-01	0.0522096	0.14245	0.133465	0.097037	0.0895845	0.485254
TCGA-2H-A9GK-01	0.121383	0.112651	0.171551	0.0837624	0.0230673	0.487585
TCGA-L5-A4OI-01	0.097121	0.185811	0.105942	0.092365	0.0309794	0.487782
TCGA-L5-A4OG-01	0.0925309	0.153766	0.142074	0.0906959	0.0468806	0.474052
TCGA-L5-A88Y-01	0.0693921	0.136887	0.127508	0.0963694	0.0623961	0.507447
TCGA-R6-A6XQ-01	0.0818496	0.107029	0.200947	0.092873	0.0186418	0.49866
TCGA-ZR-A9CJ-01	0.0613988	0.117048	0.164075	0.0974433	0.0753758	0.484659
TCGA-L5-A8NW-01	0.0826524	0.109958	0.168319	0.0934204	0.0708956	0.474755
TCGA-S8-A6BV-01	0.0508962	0.12944	0.174585	0.0810861	0.0807182	0.483274
TCGA-2H-A9GM-01	0.0877037	0.142726	0.179768	0.0827911	0.0463237	0.460688
TCGA-2H-A9GL-01	0.138711	0.159739	0.124429	0.0799341	0.0681771	0.429009
TCGA-JY-A6FB-01	0.0911126	0.12872	0.16873	0.0824688	0.0496384	0.47933
TCGA-JY-A938-01	0.113393	0.174579	0.110925	0.0983327	0.0448609	0.457909
TCGA-JY-A93C-01	0.11934	0.15724	0.129128	0.0881996	0.0505824	0.45551
TCGA-L7-A6VZ-01	0.0699365	0.138985	0.14855	0.0759477	0.0325003	0.53408
TCGA-R6-A6DN-01	0.0700281	0.141019	0.151044	0.0818179	0.069323	0.486768
TCGA-JY-A6FH-01	0.100471	0.146805	0.14516	0.0895237	0.0453493	0.472691
TCGA-L5-A8NU-01	0.183976	0.174535	0.109373	0.0734025	0.0730354	0.385678
TCGA-2H-A9GG-01	0.115195	0.156195	0.141766	0.0696547	0.0798587	0.437332
TCGA-V5-A7RE-01	0.0928481	0.12605	0.173988	0.0968512	0.0219206	0.488342
TCGA-Q9-A6FW-01	0.0813838	0.118142	0.167117	0.0994992	0.0238279	0.51003
TCGA-2H-A9GR-01	0.112602	0.163987	0.137119	0.0765812	0.0553211	0.454391
TCGA-L5-A8NL-01	0.0754341	0.132775	0.132339	0.0893321	0.131938	0.438182
TCGA-L5-A88T-01	0.0636781	0.141721	0.122271	0.0948553	0.0306618	0.546813
TCGA-L5-A43E-01	0.108572	0.130224	0.173395	0.0898688	0.0403974	0.457542
TCGA-IG-A4QS-01	0.0969636	0.135736	0.15522	0.0899199	0.0587287	0.463432
TCGA-IC-A6RE-01	0.115957	0.15399	0.149364	0.079533	0.0509256	0.450231
TCGA-JY-A93D-01	0.112473	0.142478	0.138992	0.073457	0.12717	0.405429
TCGA-R6-A8WC-01	0.108137	0.156951	0.1323	0.0853153	0.0354152	0.481882
TCGA-L5-A8NJ-01	0.0929444	0.140809	0.178699	0.0849158	0.0399575	0.462674
TCGA-L5-A8NE-01	0.0991239	0.152245	0.141578	0.0931366	0.0346879	0.479229
TCGA-R6-A8W5-01	0.115707	0.138351	0.116808	0.106359	0.0589752	0.463801
TCGA-L5-A8NS-01	0.0852214	0.0840313	0.212302	0.09328	0.0911836	0.433982
TCGA-R6-A6L4-01	0.0684035	0.150354	0.141588	0.0919938	0.0229748	0.524686
TCGA-R6-A6Y0-01	0.0655752	0.148692	0.124086	0.103766	0.00904826	0.548832
TCGA-L5-A4ON-01	0.0725322	0.122691	0.179463	0.0882853	0.0476326	0.489396
TCGA-V5-AASX-01	0.0937965	0.151429	0.146858	0.0856329	0.0326958	0.489588
TCGA-L5-A88V-01	0.0955197	0.152103	0.142239	0.0842868	0.0533282	0.472524
TCGA-IG-A7DP-01	0.171782	0.184655	0.146589	0.0508816	0.0841934	0.361899
TCGA-JY-A93E-01	0.126173	0.158725	0.130828	0.0869876	0.0990354	0.398251
TCGA-2H-A9GJ-01	0.076944	0.108263	0.206734	0.0826021	0.0254309	0.500026
TCGA-VR-AA4D-01	0.100183	0.138876	0.180359	0.085581	0.0424812	0.45252
TCGA-L5-A893-01	0.155735	0.145594	0.133319	0.0808904	0.0373715	0.447091
TCGA-2H-A9GI-01	0.123173	0.14204	0.164295	0.085813	0.0440322	0.440647
TCGA-V5-AASW-01	0.101335	0.162875	0.136725	0.0904838	0.029934	0.478647
TCGA-JY-A939-01	0.151346	0.127787	0.177862	0.0810067	0.0780484	0.38395
TCGA-L5-A4OX-01	0.0956952	0.129512	0.178732	0.0883834	0.048254	0.459423
TCGA-L5-A4OU-01	0.0756309	0.123466	0.171532	0.102834	0.0975079	0.42903
TCGA-R6-A8WG-01	0.100595	0.166705	0.128886	0.0865106	0.0777392	0.439564
TCGA-L5-A8NV-01	0.117377	0.127473	0.172655	0.0838877	0.0704496	0.428158
TCGA-L5-A8NF-01	0.0950824	0.110229	0.203474	0.0971158	0.0585791	0.43552
TCGA-L5-A4OP-01	0.0919188	0.130992	0.184016	0.0871553	0.0572184	0.448699
TCGA-L5-A8NH-01	0.0900736	0.125531	0.178239	0.0866507	0.0366783	0.482827
TCGA-L5-A4OT-01	0.0981104	0.116669	0.185228	0.0871641	0.0863607	0.426468
TCGA-L5-A4OH-01	0.0782216	0.141063	0.16546	0.0864467	0.0347218	0.494087
TCGA-L5-A8NR-01	0.0623158	0.116478	0.195851	0.0844066	0.0713522	0.469597
TCGA-RE-A7BO-01	0.0799678	0.147422	0.131026	0.106254	0.045679	0.48965
TCGA-VR-A8EQ-01	0.0889349	0.153774	0.143529	0.0912675	0.0336405	0.488854
TCGA-2H-A9GO-01	0.0879949	0.144455	0.18149	0.0888699	0.0404814	0.456709
TCGA-L5-A4OS-01	0.131983	0.142081	0.12442	0.0915903	0.0963138	0.413612
TCGA-L5-A8NG-01	0.112293	0.126569	0.172329	0.0911094	0.0728449	0.424854
TCGA-L5-A8NM-01	0.0941982	0.14899	0.150842	0.104479	0.0432443	0.458246
TCGA-L5-A8NT-01	0.0700759	0.124742	0.14351	0.0817495	0.0769995	0.502924
TCGA-L5-A891-01	0.0982565	0.164279	0.117599	0.0995032	0.0515373	0.468826
TCGA-L5-A8NI-01	0.086369	0.13938	0.147867	0.0797963	0.0687606	0.477828
TCGA-R6-A6KZ-01	0.113315	0.155639	0.138461	0.0729878	0.0715863	0.44801
TCGA-R6-A8W8-01	0.115519	0.141737	0.14653	0.0879725	0.0211248	0.487118
TCGA-R6-A6XG-01	0.0910068	0.113393	0.203992	0.0960558	0.0265509	0.469001
TCGA-2H-A9GF-01	0.107432	0.178106	0.0810963	0.0730107	0.0825937	0.477762
TCGA-L5-A4OJ-01	0.108157	0.155667	0.139027	0.0829554	0.0220821	0.492111
TCGA-L5-A43C-01	0.0588601	0.133771	0.112261	0.135937	0.0881162	0.471054
TCGA-2H-A9GN-01	0.0919086	0.119908	0.187861	0.0970205	0.049485	0.453817
TCGA-R6-A6DQ-01	0.10216	0.114482	0.175742	0.0981743	0.0599964	0.449446
TCGA-2H-A9GH-01	0.103477	0.127028	0.169698	0.0869475	0.0775009	0.435349
TCGA-L5-A4OE-01	0.0749627	0.140156	0.154172	0.0947876	0.0296603	0.506262
TCGA-V5-A7RB-01	0.0858887	0.160158	0.14236	0.0917268	0.0379619	0.481905
TCGA-M9-A5M8-01	0.11078	0.124774	0.16849	0.0930287	0.0435143	0.459413
TCGA-L5-A8NN-01	0.112704	0.110043	0.182159	0.0788596	0.0707823	0.445452
TCGA-L5-A4OO-01	0.126462	0.130786	0.155074	0.0866857	0.115126	0.385867
TCGA-L5-A4OW-01	0.0859137	0.141624	0.179329	0.091364	0.0434314	0.458338
TCGA-2H-A9GQ-01	0.0879716	0.139138	0.155226	0.0792452	0.0564769	0.481942

## Sheet: Supplementary Table 8
Supplementary Table 8. The infiltration fraction of six immune cell types in GIAC adjacent normal samples.
	B_cell	CD4_Tcell	CD8_Tcell	Neutrophil	Macrophage	Dendritic
TCGA-AA-3511-11	0.319451	0.156669	0.0864906	0.0633176	0.0447962	0.329275
TCGA-AA-3517-11	0.198333	0.17951	0.135374	0.0707572	0.0431189	0.372907
TCGA-AA-3496-11	0.0488827	0.134736	0.175342	0.0760583	0.13785	0.427131
TCGA-A6-5659-11	0.152093	0.103148	0.195337	0.0997813	0.102894	0.346746
TCGA-AA-3713-11	0.104053	0.042845	0.25458	0.0790888	0.132037	0.387396
TCGA-AA-3655-11	0.0956983	0.124144	0.209135	0.0616909	0.100459	0.408873
TCGA-AZ-6601-11	0.137717	0.172604	0.142295	0.0683698	0.0497664	0.429247
TCGA-AA-3514-11	0.0576216	0.0787068	0.28064	0.119478	0	0.463553
TCGA-AA-3697-11	0.102916	0.0954544	0.165277	0.101897	0.0602642	0.474191
TCGA-AZ-6598-11	0.097245	0.200034	0.154134	0.0900777	0.0650033	0.393506
TCGA-A6-2678-11	0.0808987	0.151902	0.152777	0.0889465	0.169504	0.355972
TCGA-AA-3531-11	0.101022	0.101792	0.199789	0.0955692	0.00133133	0.500496
TCGA-AA-3534-11	0.180274	0.18096	0.0951915	0.0692671	0.0796382	0.39467
TCGA-AA-3525-11	0.199927	0.164365	0.131231	0.0834301	0.0563198	0.364727
TCGA-AA-3527-11	0.0911636	0.10999	0.170461	0.0861523	0.0739323	0.4683
TCGA-AA-3663-11	0.0710284	0.160505	0.1386	0.0840519	0.140173	0.405642
TCGA-AA-3489-11	0.0394807	0.124265	0.146118	0.149614	0.0330981	0.507425
TCGA-A6-2686-11	0.0739007	0.106317	0.197256	0.0808028	0.0843828	0.457341
TCGA-AA-3662-11	0.0885037	0.113897	0.190675	0.0673453	0.175589	0.36399
TCGA-AA-3516-11	0.054423	0.0904913	0.2563	0.0959239	0.0271351	0.475727
TCGA-A6-2671-11	0.0760821	0.117748	0.193585	0.0795861	0.0659498	0.467049
TCGA-A6-5662-11	0.079486	0.183982	0.153887	0.0883536	0.0522597	0.442032
TCGA-A6-5665-11	0.106481	0.126541	0.175108	0.0960604	0.063404	0.432406
TCGA-A6-2684-11	0.0732596	0.111909	0.190351	0.0827129	0.0745058	0.467261
TCGA-AA-3712-11	0.0955358	0.140326	0.162744	0.0935598	0.167436	0.340399
TCGA-A6-5667-11	0.106663	0.131988	0.148806	0.103379	0.0576193	0.451545
TCGA-AA-3660-11	0.098164	0.0841724	0.253369	0.0612851	0.0437854	0.459224
TCGA-AZ-6605-11	0.00250456	0.229803	0.0884768	0.055021	0.0689009	0.555293
TCGA-AA-3518-11	0.10173	0.119626	0.174069	0.0628212	0.079898	0.461856
TCGA-A6-2675-11	0.0323505	0.159043	0.144954	0.0763419	0.0383302	0.548981
TCGA-A6-2685-11	0.0708376	0.121221	0.216757	0.0885501	0.037835	0.4648
TCGA-A6-2683-11	0.135078	0.100151	0.167811	0.0703613	0.0950372	0.431562
TCGA-A6-2679-11	0.10125	0.153307	0.202345	0.0820374	0.0646364	0.396424
TCGA-AA-3522-11	0.0966081	0.130739	0.159973	0.0788179	0.10322	0.430642
TCGA-AZ-6600-11	0.113802	0.138481	0.159287	0.105832	0.0447969	0.4378
TCGA-F4-6704-11	0.0667479	0.140439	0.181488	0.107865	0.121729	0.381731
TCGA-AA-3520-11	0.142364	0.109512	0.15	0.0731017	0.0700827	0.454939
TCGA-A6-2682-11	0.182437	0.137823	0.115529	0.0836923	0.0934369	0.387082
TCGA-AZ-6603-11	0.0110809	0.150793	0.142211	0.0948459	0.210946	0.390124
TCGA-A6-2680-11	0.0456535	0.216137	0.104331	0.0648973	0.1266	0.442381
TCGA-AZ-6599-11	0.0642508	0.129979	0.16979	0.0838218	0.14974	0.402419
TCGA-AG-3742-11	0.118138	0.0805738	0.194418	0.0856746	0.0889417	0.432254
TCGA-AF-5654-11	0.103436	0.0838858	0.217041	0.0899049	0.0639822	0.441751
TCGA-AH-6643-11	0.247386	0.121779	0.148594	0.0777961	0.0435684	0.360877
TCGA-AF-2692-11	0.103645	0.0970991	0.185498	0.10396	0.0421146	0.467684
TCGA-AF-3400-11	0.0971809	0.079309	0.214198	0.0898781	0.064586	0.454848
TCGA-AF-2691-11	0.149945	0.0877319	0.194919	0.0931713	0.0503769	0.423856
TCGA-AG-3732-11	0.142217	0.0923292	0.169341	0.0691299	0.0481118	0.478872
TCGA-AG-3731-11	0.15271	0.110861	0.172116	0.0863199	0.106573	0.37142
TCGA-AG-3725-11	0.0953995	0.0696467	0.238733	0.0895835	0.0866772	0.41996
TCGA-AF-2689-11	0.205546	0.110506	0.148417	0.0685751	0.0269803	0.439976
TCGA-HU-A4GY-11	0.074657	0.203176	0.090376	0.0821666	0.183222	0.366403
TCGA-IP-7968-11	0.0944358	0.129494	0.14226	0.110119	0.00203201	0.521658
TCGA-CG-5721-11	0.0323995	0.106834	0.3245	0.0826884	0	0.453578
TCGA-HU-A4GH-11	0.0446202	0.168906	0.0822048	0.0929788	0.150332	0.460958
TCGA-HU-A4GP-11	0.0662658	0.187333	0.0587242	0.066374	0.145266	0.476037
TCGA-BR-6454-11	0.130266	0.148448	0.183069	0.110472	0.10395	0.323795
TCGA-CG-5730-11	0.0873966	0.130588	0.190599	0.0941864	0	0.49723
TCGA-HU-A4GN-11	0.0444026	0.140595	0.124141	0.102574	0.0873504	0.500936
TCGA-CG-5722-11	0.0781097	0.150881	0.18276	0.101165	0.0531667	0.433918
TCGA-FP-7829-11	0.0557174	0.196656	0.0847067	0.0881467	0.200212	0.374561
TCGA-IN-AB1X-11	0.122028	0.142921	0.122229	0.0984049	0	0.514418
TCGA-BR-7704-11	0.0551681	0.165592	0.142092	0.104314	0.142263	0.390572
TCGA-BR-7703-11	0.1248	0.152041	0.159555	0.100934	0.0267325	0.435938
TCGA-BR-6453-11	0.0861998	0.119571	0.2262	0.121046	0.0714812	0.375502
TCGA-BR-7717-11	0.132089	0.156253	0.208533	0.103959	0.0476609	0.351505
TCGA-BR-7716-11	0.0862485	0.133233	0.197151	0.108226	0.0426571	0.432484
TCGA-IN-7806-11	0.126749	0.163909	0.111885	0.109896	0	0.487561
TCGA-HU-A4GC-11	0.0377478	0.196858	0.0754734	0.0686758	0.178502	0.442743
TCGA-CG-5734-11	0.0659945	0.117086	0.198991	0.104638	0	0.51329
TCGA-HU-8238-11	0.0820116	0.143199	0.176683	0.102111	0	0.495996
TCGA-CG-5728-11	0.121187	0.190764	0.170346	0.0740292	0	0.443674
TCGA-BR-6802-11	0.0258105	0.0353664	0.379487	0.102446	0.060347	0.396543
TCGA-HU-A4HB-11	0.044755	0.195826	0.0697448	0.0696326	0.0986142	0.521428
TCGA-BR-6457-11	0.101088	0.161029	0.192259	0.0881101	0.0770573	0.380457
TCGA-BR-7851-11	0.074464	0.164063	0.165096	0.106831	0	0.489547
TCGA-FP-7735-11	0.0690445	0.201201	0.118221	0.0953723	0.264483	0.251679
TCGA-BR-8060-11	0.083529	0.147454	0.178772	0.106843	0.0514019	0.432001
TCGA-IN-AB1V-11	0.142002	0.158726	0.115846	0.0962884	0	0.487137
TCGA-BR-7715-11	0.110117	0.180486	0.213356	0.10059	0.0645545	0.330897
TCGA-CG-5733-11	0.116099	0.130974	0.207552	0.0790339	0	0.46634
TCGA-CG-5720-11	0.102046	0.179109	0.149916	0.0891361	0	0.479793
TCGA-IN-8663-11	0.150879	0.128663	0.113971	0.100287	0	0.5062
TCGA-L5-A4OR-11	0.122743	0.134822	0.179741	0.088762	0.0819606	0.391971
TCGA-L5-A4OG-11	0.110965	0.142329	0.154745	0.0826486	0.0962262	0.413086
TCGA-L5-A4OQ-11	0.00994093	0.163585	0.0652177	0.0870124	0.0912398	0.583004
TCGA-L5-A4OJ-11	0.114245	0.139509	0.170398	0.0897625	0.0773176	0.408767
TCGA-IC-A6RE-11	0.0979173	0.143346	0.108012	0.105123	0.00537197	0.540229
TCGA-V5-A7RE-11	0.138597	0.110475	0.177114	0.0724104	0.0425138	0.45889
TCGA-V5-AASX-11	0.117038	0.150441	0.147048	0.0868027	0.042574	0.456096
TCGA-L5-A4OF-11	0.0962701	0.119002	0.18689	0.0858062	0.0552099	0.456822
TCGA-L5-A4OO-11	0.0699207	0.120703	0.157075	0.0911884	0.0359147	0.525198
TCGA-L5-A43C-11	0.122743	0.131074	0.188442	0.0915474	0.0948654	0.371329

## Sheet: Supplementary Table 12
Supplementary Table 12. The patient classification consistency of the three NMF clustering methods.
	Kappa value	p value
Lee vs brunet	0.698	0
brunet vs nsNMF	0.709	0
Lee vs nsNMF	0.923	0
	average Kappa value with other methods
Lee	0.8105
brunet	0.7035
nsNMF	0.816
Patients	nsNMF	brunet	Lee
TCGA-AA-3549	TME-C1	TME-C1	TME-C1
TCGA-AY-4071	TME-C1	TME-C2	TME-C1
TCGA-CM-4752	TME-C1	TME-C2	TME-C1
TCGA-AA-3688	TME-C1	TME-C1	TME-C1
TCGA-AA-3854	TME-C1	TME-C1	TME-C1
TCGA-A6-3809	TME-C1	TME-C2	TME-C1
TCGA-AA-3494	TME-C1	TME-C1	TME-C1
TCGA-CM-4750	TME-C1	TME-C1	TME-C1
TCGA-AA-3529	TME-C1	TME-C1	TME-C1
TCGA-AA-3949	TME-C1	TME-C2	TME-C2
TCGA-AA-3848	TME-C1	TME-C1	TME-C1
TCGA-AA-3818	TME-C1	TME-C1	TME-C1
TCGA-AA-3710	TME-C1	TME-C2	TME-C2
TCGA-AA-3950	TME-C1	TME-C2	TME-C1
TCGA-AA-A00N	TME-C1	TME-C1	TME-C1
TCGA-AA-A00K	TME-C1	TME-C1	TME-C1
TCGA-AA-3715	TME-C1	TME-C2	TME-C2
TCGA-AA-A00W	TME-C1	TME-C1	TME-C1
TCGA-A6-2677	TME-C1	TME-C1	TME-C1
TCGA-AA-A00R	TME-C1	TME-C2	TME-C1
TCGA-A6-2672	TME-C1	TME-C2	TME-C1
TCGA-AA-3970	TME-C1	TME-C1	TME-C1
TCGA-AA-3524	TME-C1	TME-C1	TME-C1
TCGA-AA-3684	TME-C1	TME-C2	TME-C1
TCGA-AA-3971	TME-C1	TME-C2	TME-C1
TCGA-AA-3989	TME-C1	TME-C1	TME-C1
TCGA-AA-A00D	TME-C1	TME-C2	TME-C1
TCGA-A6-2674	TME-C1	TME-C2	TME-C2
TCGA-AA-3510	TME-C1	TME-C1	TME-C1
TCGA-AA-3488	TME-C1	TME-C1	TME-C1
TCGA-AA-3941	TME-C1	TME-C1	TME-C1
TCGA-AA-3517	TME-C1	TME-C1	TME-C1
TCGA-AA-3678	TME-C1	TME-C1	TME-C1
TCGA-AA-3821	TME-C1	TME-C1	TME-C1
TCGA-AA-3530	TME-C1	TME-C1	TME-C1
TCGA-AA-A004	TME-C1	TME-C1	TME-C1
TCGA-A6-3808	TME-C1	TME-C2	TME-C1
TCGA-AA-A010	TME-C1	TME-C1	TME-C1
TCGA-AA-A02J	TME-C1	TME-C1	TME-C1
TCGA-AA-3837	TME-C1	TME-C1	TME-C1
TCGA-AA-3521	TME-C1	TME-C1	TME-C1
TCGA-AA-A02R	TME-C1	TME-C2	TME-C2
TCGA-AA-A02O	TME-C1	TME-C1	TME-C1
TCGA-AA-3845	TME-C1	TME-C2	TME-C1
TCGA-AA-3856	TME-C1	TME-C2	TME-C1
TCGA-AA-A00Q	TME-C1	TME-C1	TME-C1
TCGA-AA-A00F	TME-C1	TME-C1	TME-C1
TCGA-AA-3815	TME-C1	TME-C2	TME-C1
TCGA-AA-3867	TME-C1	TME-C1	TME-C1
TCGA-AA-A01D	TME-C1	TME-C1	TME-C1
TCGA-A6-3807	TME-C1	TME-C1	TME-C1
TCGA-CM-5341	TME-C1	TME-C2	TME-C1
TCGA-AA-3862	TME-C1	TME-C2	TME-C1
TCGA-AA-3939	TME-C1	TME-C1	TME-C1
TCGA-AA-3514	TME-C1	TME-C1	TME-C1
TCGA-AA-3833	TME-C1	TME-C2	TME-C1
TCGA-AA-A00Z	TME-C1	TME-C1	TME-C1
TCGA-AA-3679	TME-C1	TME-C1	TME-C1
TCGA-A6-4107	TME-C1	TME-C1	TME-C1
TCGA-AA-A01V	TME-C1	TME-C1	TME-C1
TCGA-AA-3844	TME-C1	TME-C1	TME-C1
TCGA-AA-A01G	TME-C1	TME-C1	TME-C1
TCGA-AA-3870	TME-C1	TME-C2	TME-C1
TCGA-AA-A00A	TME-C1	TME-C1	TME-C1
TCGA-AA-3855	TME-C1	TME-C1	TME-C1
TCGA-AA-3519	TME-C1	TME-C1	TME-C1
TCGA-AA-3534	TME-C1	TME-C1	TME-C1
TCGA-AA-A03J	TME-C1	TME-C1	TME-C1
TCGA-AA-A01K	TME-C1	TME-C1	TME-C1
TCGA-AA-3984	TME-C1	TME-C1	TME-C1
TCGA-AA-3520	TME-C1	TME-C1	TME-C1
TCGA-AA-3543	TME-C1	TME-C2	TME-C1
TCGA-A6-2681	TME-C1	TME-C1	TME-C1
TCGA-AA-3869	TME-C1	TME-C2	TME-C1
TCGA-AA-A01S	TME-C1	TME-C1	TME-C1
TCGA-AA-3966	TME-C1	TME-C2	TME-C1
TCGA-A6-2676	TME-C1	TME-C2	TME-C1
TCGA-AA-3846	TME-C1	TME-C1	TME-C1
TCGA-AA-3544	TME-C1	TME-C2	TME-C1
TCGA-AA-3956	TME-C1	TME-C1	TME-C1
TCGA-AA-3532	TME-C1	TME-C2	TME-C1
TCGA-AA-3955	TME-C1	TME-C1	TME-C1
TCGA-AA-3851	TME-C1	TME-C1	TME-C1
TCGA-AA-A02F	TME-C1	TME-C1	TME-C1
TCGA-AA-3861	TME-C1	TME-C1	TME-C1
TCGA-AA-3522	TME-C1	TME-C1	TME-C1
TCGA-AA-A00U	TME-C1	TME-C1	TME-C1
TCGA-AA-3930	TME-C1	TME-C1	TME-C1
TCGA-AA-3947	TME-C1	TME-C1	TME-C1
TCGA-AA-3841	TME-C1	TME-C1	TME-C1
TCGA-AA-3814	TME-C1	TME-C2	TME-C1
TCGA-AA-3553	TME-C1	TME-C2	TME-C1
TCGA-AA-3866	TME-C1	TME-C2	TME-C1
TCGA-AA-A017	TME-C1	TME-C1	TME-C1
TCGA-AA-3994	TME-C1	TME-C1	TME-C1
TCGA-AA-3877	TME-C1	TME-C2	TME-C1
TCGA-AA-A00L	TME-C1	TME-C1	TME-C1
TCGA-AA-3696	TME-C1	TME-C1	TME-C1
TCGA-AA-A00O	TME-C1	TME-C1	TME-C1
TCGA-AA-3858	TME-C1	TME-C1	TME-C1
TCGA-AA-3872	TME-C1	TME-C2	TME-C1
TCGA-AA-A01R	TME-C1	TME-C2	TME-C1
TCGA-AA-3975	TME-C1	TME-C1	TME-C1
TCGA-AA-3986	TME-C1	TME-C2	TME-C1
TCGA-AA-3831	TME-C1	TME-C1	TME-C1
TCGA-AA-A02H	TME-C1	TME-C1	TME-C1
TCGA-AA-3548	TME-C1	TME-C1	TME-C1
TCGA-AA-3538	TME-C1	TME-C1	TME-C1
TCGA-AA-3842	TME-C1	TME-C1	TME-C1
TCGA-AZ-4308	TME-C1	TME-C1	TME-C1
TCGA-AA-3680	TME-C1	TME-C1	TME-C1
TCGA-AA-3542	TME-C1	TME-C1	TME-C1
TCGA-AA-A024	TME-C1	TME-C1	TME-C1
TCGA-AA-3666	TME-C1	TME-C1	TME-C1
TCGA-AA-3673	TME-C1	TME-C1	TME-C1
TCGA-AA-3952	TME-C1	TME-C1	TME-C1
TCGA-AY-4070	TME-C1	TME-C1	TME-C1
TCGA-AA-A00J	TME-C1	TME-C1	TME-C1
TCGA-AA-3667	TME-C1	TME-C1	TME-C1
TCGA-AA-3852	TME-C1	TME-C1	TME-C1
TCGA-AA-3976	TME-C1	TME-C1	TME-C1
TCGA-AA-3811	TME-C1	TME-C1	TME-C1
TCGA-AA-3819	TME-C1	TME-C1	TME-C1
TCGA-AA-A022	TME-C1	TME-C2	TME-C2
TCGA-AA-3875	TME-C1	TME-C1	TME-C1
TCGA-AA-3864	TME-C1	TME-C1	TME-C1
TCGA-A6-2678	TME-C1	TME-C1	TME-C1
TCGA-AA-A01Q	TME-C1	TME-C1	TME-C1
TCGA-AA-A00E	TME-C1	TME-C2	TME-C1
TCGA-AA-A02W	TME-C1	TME-C1	TME-C1
TCGA-AA-3980	TME-C1	TME-C2	TME-C1
TCGA-AA-3681	TME-C1	TME-C1	TME-C1
TCGA-A6-2671	TME-C1	TME-C1	TME-C1
TCGA-AA-A029	TME-C1	TME-C1	TME-C1
TCGA-AA-3518	TME-C1	TME-C1	TME-C1
TCGA-AA-A01T	TME-C1	TME-C1	TME-C1
TCGA-AA-3850	TME-C1	TME-C2	TME-C1
TCGA-AA-3812	TME-C1	TME-C1	TME-C1
TCGA-A6-3810	TME-C1	TME-C2	TME-C1
TCGA-AA-3664	TME-C1	TME-C1	TME-C1
TCGA-AA-3692	TME-C1	TME-C1	TME-C1
TCGA-AA-3968	TME-C1	TME-C1	TME-C1
TCGA-AA-3560	TME-C1	TME-C1	TME-C1
TCGA-AA-3982	TME-C1	TME-C2	TME-C1
TCGA-A6-2683	TME-C1	TME-C1	TME-C1
TCGA-AA-3977	TME-C1	TME-C1	TME-C1
TCGA-AA-A01F	TME-C1	TME-C1	TME-C1
TCGA-AA-3552	TME-C1	TME-C2	TME-C1
TCGA-AA-3979	TME-C1	TME-C1	TME-C1
TCGA-AA-A01I	TME-C1	TME-C1	TME-C1
TCGA-AA-A03F	TME-C1	TME-C1	TME-C1
TCGA-AA-3693	TME-C1	TME-C1	TME-C1
TCGA-AA-A02E	TME-C1	TME-C1	TME-C1
TCGA-CM-4746	TME-C1	TME-C1	TME-C1
TCGA-AA-A01C	TME-C1	TME-C1	TME-C1
TCGA-A6-2680	TME-C1	TME-C1	TME-C1
TCGA-AA-3561	TME-C1	TME-C1	TME-C1
TCGA-AA-3525	TME-C1	TME-C1	TME-C1
TCGA-AA-3531	TME-C1	TME-C1	TME-C1
TCGA-AA-3973	TME-C1	TME-C1	TME-C1
TCGA-AA-3527	TME-C1	TME-C1	TME-C1
TCGA-AA-3555	TME-C1	TME-C1	TME-C1
TCGA-AG-A025	TME-C1	TME-C1	TME-C1
TCGA-AG-3582	TME-C1	TME-C1	TME-C1
TCGA-AG-3609	TME-C1	TME-C1	TME-C1
TCGA-AG-A01L	TME-C1	TME-C1	TME-C1
TCGA-AG-A01W	TME-C1	TME-C1	TME-C1
TCGA-AG-A02N	TME-C1	TME-C1	TME-C1
TCGA-AG-3727	TME-C1	TME-C1	TME-C1
TCGA-AG-3887	TME-C1	TME-C1	TME-C1
TCGA-AG-A01J	TME-C1	TME-C1	TME-C1
TCGA-AG-4015	TME-C1	TME-C1	TME-C1
TCGA-AG-A011	TME-C1	TME-C1	TME-C1
TCGA-AG-4008	TME-C1	TME-C1	TME-C1
TCGA-AG-A032	TME-C1	TME-C1	TME-C1
TCGA-AG-A020	TME-C1	TME-C1	TME-C1
TCGA-AG-A026	TME-C1	TME-C1	TME-C1
TCGA-AG-3883	TME-C1	TME-C1	TME-C1
TCGA-AG-3885	TME-C1	TME-C1	TME-C1
TCGA-AG-3893	TME-C1	TME-C1	TME-C1
TCGA-AG-A02G	TME-C1	TME-C1	TME-C1
TCGA-AG-3901	TME-C1	TME-C2	TME-C1
TCGA-AG-3726	TME-C1	TME-C1	TME-C1
TCGA-AG-3896	TME-C1	TME-C1	TME-C1
TCGA-AG-3581	TME-C1	TME-C1	TME-C1
TCGA-AG-4001	TME-C1	TME-C1	TME-C1
TCGA-AG-3586	TME-C1	TME-C1	TME-C1
TCGA-AG-3909	TME-C1	TME-C1	TME-C1
TCGA-AG-3878	TME-C1	TME-C2	TME-C1
TCGA-AG-3605	TME-C1	TME-C1	TME-C1
TCGA-AG-3601	TME-C1	TME-C1	TME-C1
TCGA-AG-3881	TME-C1	TME-C2	TME-C1
TCGA-AG-3600	TME-C1	TME-C1	TME-C1
TCGA-AG-3599	TME-C1	TME-C1	TME-C1
TCGA-AG-3584	TME-C1	TME-C1	TME-C1
TCGA-AG-A036	TME-C1	TME-C1	TME-C1
TCGA-AG-3593	TME-C1	TME-C1	TME-C1
TCGA-AG-A01Y	TME-C1	TME-C1	TME-C1
TCGA-AG-3580	TME-C1	TME-C1	TME-C1
TCGA-AG-A002	TME-C1	TME-C1	TME-C1
TCGA-AG-3728	TME-C1	TME-C2	TME-C1
TCGA-AF-3400	TME-C1	TME-C2	TME-C1
TCGA-AF-2691	TME-C1	TME-C2	TME-C1
TCGA-AG-A01N	TME-C1	TME-C1	TME-C1
TCGA-AG-3608	TME-C1	TME-C1	TME-C1
TCGA-AG-3594	TME-C1	TME-C2	TME-C1
TCGA-AG-A02X	TME-C1	TME-C1	TME-C1
TCGA-AG-3587	TME-C1	TME-C1	TME-C1
TCGA-AG-3894	TME-C1	TME-C1	TME-C1
TCGA-AG-3999	TME-C1	TME-C1	TME-C1
TCGA-AG-A00C	TME-C1	TME-C1	TME-C1
TCGA-AG-4007	TME-C1	TME-C1	TME-C1
TCGA-AG-A016	TME-C1	TME-C1	TME-C1
TCGA-AG-3575	TME-C1	TME-C1	TME-C1
TCGA-AG-A008	TME-C1	TME-C1	TME-C1
TCGA-AG-A015	TME-C1	TME-C1	TME-C1
TCGA-AG-3892	TME-C1	TME-C2	TME-C1
TCGA-AG-3898	TME-C1	TME-C1	TME-C1
TCGA-AG-3578	TME-C1	TME-C1	TME-C1
TCGA-AG-3574	TME-C1	TME-C1	TME-C1
TCGA-AG-4005	TME-C1	TME-C1	TME-C1
TCGA-AG-3583	TME-C1	TME-C1	TME-C1
TCGA-AG-A00Y	TME-C1	TME-C1	TME-C1
TCGA-AG-3890	TME-C1	TME-C1	TME-C1
TCGA-AG-3882	TME-C1	TME-C2	TME-C1
TCGA-AG-3598	TME-C1	TME-C1	TME-C1
TCGA-AG-3602	TME-C1	TME-C1	TME-C1
TCGA-AF-2692	TME-C1	TME-C1	TME-C1
TCGA-VQ-A91Z	TME-C1	TME-C1	TME-C1
TCGA-HU-A4HD	TME-C1	TME-C2	TME-C1
TCGA-D7-8573	TME-C1	TME-C2	TME-C1
TCGA-BR-8679	TME-C1	TME-C1	TME-C1
TCGA-CG-5726	TME-C1	TME-C1	TME-C1
TCGA-VQ-AA6A	TME-C1	TME-C1	TME-C1
TCGA-R5-A7ZR	TME-C1	TME-C2	TME-C1
TCGA-BR-8680	TME-C1	TME-C1	TME-C1
TCGA-VQ-A8P2	TME-C1	TME-C1	TME-C1
TCGA-VQ-A92D	TME-C1	TME-C1	TME-C1
TCGA-HU-A4GT	TME-C1	TME-C2	TME-C1
TCGA-D7-A74A	TME-C1	TME-C2	TME-C1
TCGA-HU-A4H2	TME-C1	TME-C2	TME-C1
TCGA-CG-4442	TME-C1	TME-C1	TME-C1
TCGA-BR-7717	TME-C1	TME-C2	TME-C1
TCGA-CG-4475	TME-C1	TME-C1	TME-C1
TCGA-BR-4369	TME-C1	TME-C2	TME-C1
TCGA-HU-A4GP	TME-C1	TME-C2	TME-C1
TCGA-HU-A4GD	TME-C1	TME-C1	TME-C1
TCGA-VQ-A8PK	TME-C1	TME-C2	TME-C1
TCGA-BR-7707	TME-C1	TME-C2	TME-C1
TCGA-D7-6519	TME-C1	TME-C2	TME-C1
TCGA-CG-4440	TME-C1	TME-C1	TME-C1
TCGA-VQ-A94U	TME-C1	TME-C2	TME-C1
TCGA-BR-A4CR	TME-C1	TME-C1	TME-C1
TCGA-BR-7197	TME-C1	TME-C1	TME-C1
TCGA-VQ-A8E0	TME-C1	TME-C2	TME-C1
TCGA-IN-A6RL	TME-C1	TME-C2	TME-C1
TCGA-HU-A4GF	TME-C1	TME-C2	TME-C1
TCGA-CD-5800	TME-C1	TME-C2	TME-C1
TCGA-CG-4462	TME-C1	TME-C2	TME-C2
TCGA-VQ-A8PX	TME-C1	TME-C2	TME-C1
TCGA-VQ-A8PB	TME-C1	TME-C2	TME-C1
TCGA-D7-6822	TME-C1	TME-C2	TME-C1
TCGA-R5-A7O7	TME-C1	TME-C2	TME-C1
TCGA-VQ-A8DZ	TME-C1	TME-C2	TME-C1
TCGA-BR-A4CS	TME-C1	TME-C2	TME-C1
TCGA-CG-4438	TME-C1	TME-C2	TME-C2
TCGA-BR-4368	TME-C1	TME-C2	TME-C2
TCGA-IN-A6RO	TME-C1	TME-C1	TME-C1
TCGA-D7-A6EX	TME-C1	TME-C2	TME-C1
TCGA-HU-A4G9	TME-C1	TME-C1	TME-C1
TCGA-VQ-A8DV	TME-C1	TME-C1	TME-C1
TCGA-BR-8483	TME-C1	TME-C1	TME-C1
TCGA-R5-A7ZE	TME-C1	TME-C1	TME-C1
TCGA-BR-4367	TME-C1	TME-C2	TME-C2
TCGA-BR-8687	TME-C1	TME-C1	TME-C1
TCGA-VQ-A925	TME-C1	TME-C2	TME-C1
TCGA-CD-A48A	TME-C1	TME-C2	TME-C1
TCGA-B7-A5TJ	TME-C1	TME-C1	TME-C1
TCGA-BR-4294	TME-C1	TME-C1	TME-C1
TCGA-IN-7806	TME-C1	TME-C1	TME-C1
TCGA-HU-A4GC	TME-C1	TME-C2	TME-C1
TCGA-VQ-A8P5	TME-C1	TME-C2	TME-C2
TCGA-CG-4466	TME-C1	TME-C1	TME-C1
TCGA-BR-8369	TME-C1	TME-C2	TME-C1
TCGA-CG-4444	TME-C1	TME-C2	TME-C1
TCGA-BR-7715	TME-C1	TME-C1	TME-C1
TCGA-VQ-A927	TME-C1	TME-C2	TME-C1
TCGA-D7-A6EV	TME-C1	TME-C1	TME-C1
TCGA-BR-4363	TME-C1	TME-C2	TME-C2
TCGA-IN-A7NT	TME-C1	TME-C1	TME-C1
TCGA-IN-A6RN	TME-C1	TME-C2	TME-C1
TCGA-HU-A4GH	TME-C1	TME-C1	TME-C1
TCGA-HU-A4H8	TME-C1	TME-C2	TME-C1
TCGA-BR-4370	TME-C1	TME-C2	TME-C2
TCGA-CG-4476	TME-C1	TME-C2	TME-C2
TCGA-VQ-A8DU	TME-C1	TME-C2	TME-C1
TCGA-CG-4443	TME-C1	TME-C1	TME-C1
TCGA-D7-6815	TME-C1	TME-C2	TME-C1
TCGA-IN-A6RR	TME-C1	TME-C2	TME-C1
TCGA-VQ-A928	TME-C1	TME-C2	TME-C1
TCGA-BR-8059	TME-C1	TME-C2	TME-C1
TCGA-VQ-A8DT	TME-C1	TME-C1	TME-C1
TCGA-VQ-A91D	TME-C1	TME-C2	TME-C2
TCGA-CG-4306	TME-C1	TME-C2	TME-C1
TCGA-CG-4436	TME-C1	TME-C1	TME-C1
TCGA-VQ-A94T	TME-C1	TME-C1	TME-C1
TCGA-VQ-A8PU	TME-C1	TME-C1	TME-C1
TCGA-VQ-A8PJ	TME-C1	TME-C1	TME-C1
TCGA-IN-A6RI	TME-C1	TME-C1	TME-C1
TCGA-FP-8631	TME-C1	TME-C1	TME-C1
TCGA-D7-6526	TME-C1	TME-C1	TME-C1
TCGA-CD-8528	TME-C1	TME-C2	TME-C1
TCGA-KB-A93H	TME-C1	TME-C1	TME-C1
TCGA-BR-4366	TME-C1	TME-C1	TME-C1
TCGA-SW-A7EA	TME-C1	TME-C2	TME-C1
TCGA-HU-A4G3	TME-C1	TME-C2	TME-C1
TCGA-R5-A7ZF	TME-C1	TME-C1	TME-C1
TCGA-CD-A487	TME-C1	TME-C2	TME-C1
TCGA-VQ-A922	TME-C1	TME-C2	TME-C1
TCGA-BR-8368	TME-C1	TME-C2	TME-C1
TCGA-BR-4357	TME-C1	TME-C2	TME-C2
TCGA-BR-4371	TME-C1	TME-C2	TME-C1
TCGA-VQ-A91N	TME-C1	TME-C2	TME-C1
TCGA-VQ-A94O	TME-C1	TME-C2	TME-C1
TCGA-VQ-AA64	TME-C1	TME-C2	TME-C1
TCGA-VQ-A91V	TME-C1	TME-C1	TME-C1
TCGA-FP-A8CX	TME-C1	TME-C2	TME-C1
TCGA-VQ-AA6G	TME-C1	TME-C1	TME-C1
TCGA-CG-4465	TME-C1	TME-C2	TME-C1
TCGA-HU-A4H5	TME-C1	TME-C2	TME-C1
TCGA-F1-6875	TME-C1	TME-C1	TME-C1
TCGA-HF-A5NB	TME-C1	TME-C2	TME-C1
TCGA-BR-8678	TME-C1	TME-C2	TME-C1
TCGA-D7-6528	TME-C1	TME-C1	TME-C1
TCGA-CG-4305	TME-C1	TME-C2	TME-C2
TCGA-CD-A4MH	TME-C1	TME-C2	TME-C1
TCGA-CD-A4MG	TME-C1	TME-C2	TME-C1
TCGA-F1-6177	TME-C1	TME-C1	TME-C1
TCGA-BR-4201	TME-C1	TME-C2	TME-C2
TCGA-BR-4361	TME-C1	TME-C2	TME-C2
TCGA-CG-4301	TME-C1	TME-C2	TME-C1
TCGA-BR-A44U	TME-C1	TME-C3	TME-C1
TCGA-CG-4469	TME-C1	TME-C2	TME-C1
TCGA-VQ-A8PH	TME-C1	TME-C2	TME-C1
TCGA-D7-8576	TME-C1	TME-C2	TME-C1
TCGA-VQ-A8E7	TME-C1	TME-C1	TME-C1
TCGA-RD-A8N6	TME-C1	TME-C2	TME-C1
TCGA-CD-8535	TME-C1	TME-C1	TME-C1
TCGA-VQ-A91X	TME-C1	TME-C1	TME-C1
TCGA-D7-6527	TME-C1	TME-C2	TME-C1
TCGA-BR-8289	TME-C1	TME-C2	TME-C1
TCGA-3M-AB46	TME-C1	TME-C1	TME-C1
TCGA-HU-A4H3	TME-C1	TME-C2	TME-C1
TCGA-BR-4267	TME-C1	TME-C2	TME-C1
TCGA-IN-A6RJ	TME-C1	TME-C1	TME-C1
TCGA-VQ-AA6D	TME-C1	TME-C1	TME-C1
TCGA-CG-4304	TME-C1	TME-C2	TME-C1
TCGA-RD-A7BT	TME-C1	TME-C1	TME-C1
TCGA-VQ-A91Q	TME-C1	TME-C2	TME-C1
TCGA-HU-A4GU	TME-C1	TME-C1	TME-C1
TCGA-IN-AB1V	TME-C1	TME-C2	TME-C1
TCGA-EQ-8122	TME-C1	TME-C1	TME-C1
TCGA-CD-5799	TME-C1	TME-C1	TME-C1
TCGA-BR-A4J6	TME-C1	TME-C2	TME-C1
TCGA-L5-A4OI	TME-C1	TME-C1	TME-C1
TCGA-R6-A6XQ	TME-C1	TME-C1	TME-C1
TCGA-2H-A9GM	TME-C1	TME-C2	TME-C1
TCGA-JY-A6FB	TME-C1	TME-C1	TME-C1
TCGA-JY-A93C	TME-C1	TME-C2	TME-C1
TCGA-L7-A6VZ	TME-C1	TME-C1	TME-C1
TCGA-R6-A6DN	TME-C1	TME-C2	TME-C1
TCGA-JY-A6FH	TME-C1	TME-C1	TME-C1
TCGA-V5-A7RE	TME-C1	TME-C1	TME-C1
TCGA-2H-A9GR	TME-C1	TME-C2	TME-C1
TCGA-IG-A4QS	TME-C1	TME-C2	TME-C1
TCGA-R6-A8WC	TME-C1	TME-C1	TME-C1
TCGA-L5-A8NJ	TME-C1	TME-C1	TME-C1
TCGA-L5-A8NE	TME-C1	TME-C1	TME-C1
TCGA-R6-A6L4	TME-C1	TME-C1	TME-C1
TCGA-L5-A4ON	TME-C1	TME-C1	TME-C1
TCGA-L5-A88V	TME-C1	TME-C1	TME-C1
TCGA-VR-AA4D	TME-C1	TME-C1	TME-C1
TCGA-2H-A9GI	TME-C1	TME-C2	TME-C1
TCGA-V5-AASW	TME-C1	TME-C1	TME-C1
TCGA-L5-A4OX	TME-C1	TME-C2	TME-C1
TCGA-L5-A8NF	TME-C1	TME-C1	TME-C1
TCGA-L5-A8NH	TME-C1	TME-C2	TME-C1
TCGA-L5-A4OH	TME-C1	TME-C1	TME-C1
TCGA-L5-A8NR	TME-C1	TME-C2	TME-C1
TCGA-RE-A7BO	TME-C1	TME-C1	TME-C1
TCGA-VR-A8EQ	TME-C1	TME-C2	TME-C1
TCGA-2H-A9GO	TME-C1	TME-C1	TME-C1
TCGA-L5-A891	TME-C1	TME-C1	TME-C1
TCGA-L5-A8NI	TME-C1	TME-C2	TME-C1
TCGA-R6-A8W8	TME-C1	TME-C2	TME-C1
TCGA-R6-A6XG	TME-C1	TME-C1	TME-C1
TCGA-L5-A4OJ	TME-C1	TME-C1	TME-C1
TCGA-2H-A9GN	TME-C1	TME-C1	TME-C1
TCGA-2H-A9GH	TME-C1	TME-C2	TME-C1
TCGA-V5-A7RB	TME-C1	TME-C1	TME-C1
TCGA-M9-A5M8	TME-C1	TME-C2	TME-C1
TCGA-L5-A8NN	TME-C1	TME-C2	TME-C1
TCGA-L5-A4OW	TME-C1	TME-C2	TME-C1
TCGA-AZ-4615	TME-C2	TME-C2	TME-C3
TCGA-A6-6138	TME-C2	TME-C2	TME-C2
TCGA-CK-5916	TME-C2	TME-C2	TME-C3
TCGA-A6-2686	TME-C2	TME-C2	TME-C2
TCGA-CA-6717	TME-C2	TME-C2	TME-C3
TCGA-A6-6780	TME-C2	TME-C2	TME-C2
TCGA-AY-6196	TME-C2	TME-C2	TME-C2
TCGA-AZ-4323	TME-C2	TME-C2	TME-C2
TCGA-F4-6703	TME-C2	TME-C2	TME-C2
TCGA-A6-6654	TME-C2	TME-C2	TME-C2
TCGA-G4-6628	TME-C2	TME-C2	TME-C2
TCGA-AA-A01P	TME-C2	TME-C2	TME-C2
TCGA-CM-6169	TME-C2	TME-C2	TME-C3
TCGA-CM-6162	TME-C2	TME-C2	TME-C3
TCGA-F4-6807	TME-C2	TME-C2	TME-C2
TCGA-5M-AAT6	TME-C2	TME-C2	TME-C2
TCGA-CA-6718	TME-C2	TME-C2	TME-C2
TCGA-AD-6899	TME-C2	TME-C2	TME-C3
TCGA-AA-3685	TME-C2	TME-C2	TME-C3
TCGA-AD-6964	TME-C2	TME-C2	TME-C2
TCGA-F4-6570	TME-C2	TME-C2	TME-C2
TCGA-AA-3489	TME-C2	TME-C2	TME-C2
TCGA-A6-A565	TME-C2	TME-C2	TME-C3
TCGA-A6-6651	TME-C2	TME-C2	TME-C2
TCGA-D5-6928	TME-C2	TME-C2	TME-C2
TCGA-D5-6534	TME-C2	TME-C2	TME-C2
TCGA-D5-6529	TME-C2	TME-C2	TME-C3
TCGA-EI-6511	TME-C2	TME-C2	TME-C3
TCGA-AG-3731	TME-C2	TME-C2	TME-C3
TCGA-AF-2687	TME-C2	TME-C2	TME-C3
TCGA-DC-6156	TME-C2	TME-C2	TME-C3
TCGA-AG-3902	TME-C2	TME-C2	TME-C2
TCGA-AF-2690	TME-C2	TME-C2	TME-C2
TCGA-AH-6547	TME-C2	TME-C2	TME-C3
TCGA-F5-6464	TME-C2	TME-C2	TME-C3
TCGA-D7-5577	TME-C2	TME-C2	TME-C2
TCGA-D7-6818	TME-C2	TME-C2	TME-C2
TCGA-BR-4280	TME-C2	TME-C2	TME-C2
TCGA-D7-8572	TME-C2	TME-C2	TME-C2
TCGA-BR-7959	TME-C2	TME-C2	TME-C2
TCGA-BR-6453	TME-C2	TME-C2	TME-C2
TCGA-HF-7132	TME-C2	TME-C2	TME-C2
TCGA-BR-A4IV	TME-C2	TME-C2	TME-C2
TCGA-CG-5718	TME-C2	TME-C2	TME-C2
TCGA-RD-A8N2	TME-C2	TME-C2	TME-C2
TCGA-ZA-A8F6	TME-C2	TME-C2	TME-C2
TCGA-IN-A7NR	TME-C2	TME-C2	TME-C2
TCGA-BR-6456	TME-C2	TME-C2	TME-C2
TCGA-CD-8524	TME-C2	TME-C2	TME-C2
TCGA-VQ-A8PO	TME-C2	TME-C2	TME-C2
TCGA-VQ-A94R	TME-C2	TME-C2	TME-C2
TCGA-FP-8211	TME-C2	TME-C2	TME-C2
TCGA-D7-A747	TME-C2	TME-C2	TME-C2
TCGA-KB-A93G	TME-C2	TME-C2	TME-C3
TCGA-RD-A8MV	TME-C2	TME-C2	TME-C2
TCGA-BR-4256	TME-C2	TME-C2	TME-C2
TCGA-FP-7735	TME-C2	TME-C2	TME-C2
TCGA-IN-A6RS	TME-C2	TME-C2	TME-C2
TCGA-BR-8487	TME-C2	TME-C2	TME-C2
TCGA-CG-5717	TME-C2	TME-C2	TME-C2
TCGA-HU-8249	TME-C2	TME-C2	TME-C2
TCGA-BR-6454	TME-C2	TME-C2	TME-C2
TCGA-BR-7722	TME-C2	TME-C2	TME-C2
TCGA-BR-7958	TME-C2	TME-C2	TME-C2
TCGA-VQ-A94P	TME-C2	TME-C2	TME-C2
TCGA-D7-8575	TME-C2	TME-C2	TME-C2
TCGA-VQ-A8PP	TME-C2	TME-C2	TME-C2
TCGA-BR-8372	TME-C2	TME-C2	TME-C2
TCGA-VQ-A91Y	TME-C2	TME-C2	TME-C2
TCGA-CG-5732	TME-C2	TME-C2	TME-C2
TCGA-RD-A8MW	TME-C2	TME-C2	TME-C2
TCGA-KB-A6F7	TME-C2	TME-C2	TME-C2
TCGA-BR-8382	TME-C2	TME-C2	TME-C2
TCGA-R5-A7ZI	TME-C2	TME-C2	TME-C2
TCGA-BR-8588	TME-C2	TME-C2	TME-C2
TCGA-CD-5801	TME-C2	TME-C2	TME-C2
TCGA-CD-8530	TME-C2	TME-C2	TME-C2
TCGA-D7-8578	TME-C2	TME-C2	TME-C2
TCGA-BR-6458	TME-C2	TME-C2	TME-C2
TCGA-BR-8284	TME-C2	TME-C2	TME-C2
TCGA-3M-AB47	TME-C2	TME-C2	TME-C2
TCGA-BR-8381	TME-C2	TME-C2	TME-C2
TCGA-BR-4191	TME-C2	TME-C2	TME-C2
TCGA-MX-A666	TME-C2	TME-C2	TME-C2
TCGA-CD-A486	TME-C2	TME-C2	TME-C2
TCGA-BR-8077	TME-C2	TME-C2	TME-C2
TCGA-MX-A663	TME-C2	TME-C2	TME-C2
TCGA-BR-A44T	TME-C2	TME-C2	TME-C2
TCGA-HU-A4H6	TME-C2	TME-C2	TME-C2
TCGA-RD-A7BW	TME-C2	TME-C2	TME-C2
TCGA-D7-8570	TME-C2	TME-C2	TME-C2
TCGA-CG-5720	TME-C2	TME-C2	TME-C2
TCGA-D7-8579	TME-C2	TME-C2	TME-C2
TCGA-IP-7968	TME-C2	TME-C2	TME-C2
TCGA-BR-8371	TME-C2	TME-C2	TME-C2
TCGA-KB-A93J	TME-C2	TME-C2	TME-C2
TCGA-D7-A4YU	TME-C2	TME-C2	TME-C2
TCGA-BR-6705	TME-C2	TME-C2	TME-C2
TCGA-BR-6803	TME-C2	TME-C2	TME-C2
TCGA-BR-6564	TME-C2	TME-C2	TME-C2
TCGA-D7-A4YX	TME-C2	TME-C2	TME-C2
TCGA-CG-4441	TME-C2	TME-C2	TME-C2
TCGA-CG-5719	TME-C2	TME-C2	TME-C2
TCGA-HU-A4GX	TME-C2	TME-C2	TME-C2
TCGA-VQ-A8PC	TME-C2	TME-C2	TME-C2
TCGA-CD-8526	TME-C2	TME-C2	TME-C2
TCGA-BR-8380	TME-C2	TME-C2	TME-C2
TCGA-VQ-A8PQ	TME-C2	TME-C2	TME-C2
TCGA-BR-8291	TME-C2	TME-C2	TME-C2
TCGA-HU-A4GQ	TME-C2	TME-C2	TME-C2
TCGA-BR-8081	TME-C2	TME-C2	TME-C2
TCGA-HU-A4H4	TME-C2	TME-C2	TME-C2
TCGA-VQ-A91K	TME-C2	TME-C2	TME-C2
TCGA-BR-8297	TME-C2	TME-C2	TME-C2
TCGA-BR-8683	TME-C2	TME-C2	TME-C2
TCGA-F1-A72C	TME-C2	TME-C2	TME-C2
TCGA-VQ-A8PM	TME-C2	TME-C2	TME-C2
TCGA-IN-7808	TME-C2	TME-C2	TME-C2
TCGA-HU-A4G8	TME-C2	TME-C2	TME-C2
TCGA-IN-8462	TME-C2	TME-C2	TME-C1
TCGA-BR-A4J4	TME-C2	TME-C2	TME-C2
TCGA-VQ-AA6F	TME-C2	TME-C2	TME-C2
TCGA-BR-A4J8	TME-C2	TME-C2	TME-C1
TCGA-BR-6707	TME-C2	TME-C2	TME-C2
TCGA-BR-8682	TME-C2	TME-C2	TME-C2
TCGA-HU-A4H0	TME-C2	TME-C2	TME-C2
TCGA-BR-8677	TME-C2	TME-C2	TME-C2
TCGA-FP-7998	TME-C2	TME-C2	TME-C2
TCGA-D7-8574	TME-C2	TME-C2	TME-C2
TCGA-CD-8532	TME-C2	TME-C2	TME-C2
TCGA-D7-A4Z0	TME-C2	TME-C2	TME-C2
TCGA-BR-8590	TME-C2	TME-C2	TME-C2
TCGA-D7-A748	TME-C2	TME-C2	TME-C2
TCGA-VQ-A91U	TME-C2	TME-C2	TME-C2
TCGA-CG-4477	TME-C2	TME-C2	TME-C2
TCGA-RD-A8N5	TME-C2	TME-C2	TME-C3
TCGA-D7-A6EZ	TME-C2	TME-C2	TME-C2
TCGA-VQ-A8PD	TME-C2	TME-C2	TME-C2
TCGA-VQ-A924	TME-C2	TME-C2	TME-C2
TCGA-FP-A9TM	TME-C2	TME-C2	TME-C2
TCGA-BR-6852	TME-C2	TME-C2	TME-C2
TCGA-BR-4257	TME-C2	TME-C2	TME-C2
TCGA-BR-A4J9	TME-C2	TME-C2	TME-C2
TCGA-BR-7723	TME-C2	TME-C2	TME-C2
TCGA-RD-A8NB	TME-C2	TME-C2	TME-C2
TCGA-D7-6520	TME-C2	TME-C2	TME-C2
TCGA-BR-6452	TME-C2	TME-C2	TME-C2
TCGA-BR-A4J7	TME-C2	TME-C2	TME-C2
TCGA-VQ-A8P8	TME-C2	TME-C2	TME-C2
TCGA-BR-7901	TME-C2	TME-C2	TME-C2
TCGA-BR-6565	TME-C2	TME-C2	TME-C2
TCGA-HU-A4G2	TME-C2	TME-C2	TME-C2
TCGA-IN-A7NU	TME-C2	TME-C2	TME-C2
TCGA-CD-8534	TME-C2	TME-C2	TME-C2
TCGA-VQ-AA68	TME-C2	TME-C2	TME-C2
TCGA-D7-A6EY	TME-C2	TME-C2	TME-C2
TCGA-BR-8364	TME-C2	TME-C2	TME-C2
TCGA-BR-6563	TME-C2	TME-C2	TME-C2
TCGA-CG-5721	TME-C2	TME-C2	TME-C2
TCGA-HF-7133	TME-C2	TME-C2	TME-C2
TCGA-CD-5813	TME-C2	TME-C2	TME-C2
TCGA-BR-8484	TME-C2	TME-C2	TME-C2
TCGA-BR-6457	TME-C2	TME-C2	TME-C2
TCGA-FP-7916	TME-C2	TME-C2	TME-C2
TCGA-BR-4187	TME-C2	TME-C2	TME-C2
TCGA-BR-8592	TME-C2	TME-C2	TME-C2
TCGA-BR-7851	TME-C2	TME-C2	TME-C2
TCGA-CD-5803	TME-C2	TME-C2	TME-C2
TCGA-D7-6525	TME-C2	TME-C2	TME-C1
TCGA-RD-A8N9	TME-C2	TME-C2	TME-C2
TCGA-BR-4279	TME-C2	TME-C2	TME-C2
TCGA-BR-8080	TME-C2	TME-C2	TME-C2
TCGA-BR-A4PF	TME-C2	TME-C2	TME-C2
TCGA-CD-8531	TME-C2	TME-C2	TME-C2
TCGA-BR-8384	TME-C2	TME-C2	TME-C2
TCGA-B7-A5TI	TME-C2	TME-C2	TME-C2
TCGA-VQ-AA6J	TME-C2	TME-C2	TME-C2
TCGA-CG-5724	TME-C2	TME-C2	TME-C2
TCGA-BR-8591	TME-C2	TME-C2	TME-C2
TCGA-FP-8099	TME-C2	TME-C2	TME-C2
TCGA-F1-A448	TME-C2	TME-C2	TME-C2
TCGA-RD-A8N0	TME-C2	TME-C2	TME-C2
TCGA-FP-A4BF	TME-C2	TME-C2	TME-C2
TCGA-RD-A7BS	TME-C2	TME-C2	TME-C2
TCGA-BR-7716	TME-C2	TME-C2	TME-C2
TCGA-BR-8366	TME-C2	TME-C2	TME-C2
TCGA-CG-4437	TME-C2	TME-C2	TME-C2
TCGA-CD-5804	TME-C2	TME-C2	TME-C2
TCGA-BR-8365	TME-C2	TME-C2	TME-C2
TCGA-D7-A6F0	TME-C2	TME-C2	TME-C2
TCGA-BR-7957	TME-C2	TME-C2	TME-C2
TCGA-IN-AB1X	TME-C2	TME-C2	TME-C2
TCGA-BR-8367	TME-C2	TME-C2	TME-C2
TCGA-BR-7196	TME-C2	TME-C2	TME-C2
TCGA-B7-A5TN	TME-C2	TME-C2	TME-C2
TCGA-VQ-A8E3	TME-C2	TME-C2	TME-C2
TCGA-BR-6455	TME-C2	TME-C2	TME-C2
TCGA-BR-6802	TME-C2	TME-C2	TME-C2
TCGA-B7-A5TK	TME-C2	TME-C2	TME-C2
TCGA-D7-6522	TME-C2	TME-C2	TME-C2
TCGA-FP-8209	TME-C2	TME-C2	TME-C2
TCGA-FP-8210	TME-C2	TME-C2	TME-C2
TCGA-HU-8604	TME-C2	TME-C2	TME-C2
TCGA-RD-A8N1	TME-C2	TME-C2	TME-C2
TCGA-VQ-AA6K	TME-C2	TME-C2	TME-C2
TCGA-HU-8602	TME-C2	TME-C2	TME-C2
TCGA-BR-8485	TME-C2	TME-C2	TME-C2
TCGA-BR-8686	TME-C2	TME-C2	TME-C2
TCGA-BR-8589	TME-C2	TME-C2	TME-C2
TCGA-D7-6524	TME-C2	TME-C2	TME-C2
TCGA-CG-5722	TME-C2	TME-C2	TME-C2
TCGA-BR-8486	TME-C2	TME-C2	TME-C2
TCGA-VQ-A8PE	TME-C2	TME-C2	TME-C2
TCGA-BR-A4J5	TME-C2	TME-C2	TME-C2
TCGA-CD-5798	TME-C2	TME-C2	TME-C2
TCGA-ZQ-A9CR	TME-C2	TME-C2	TME-C2
TCGA-CG-5734	TME-C2	TME-C2	TME-C2
TCGA-R5-A805	TME-C2	TME-C2	TME-C2
TCGA-BR-4253	TME-C2	TME-C2	TME-C2
TCGA-BR-8058	TME-C2	TME-C2	TME-C2
TCGA-VQ-A8P3	TME-C2	TME-C2	TME-C1
TCGA-VQ-A8E2	TME-C2	TME-C2	TME-C2
TCGA-MX-A5UG	TME-C2	TME-C2	TME-C2
TCGA-RD-A8N4	TME-C2	TME-C2	TME-C2
TCGA-CG-5723	TME-C2	TME-C2	TME-C2
TCGA-F1-6874	TME-C2	TME-C2	TME-C2
TCGA-VQ-A923	TME-C2	TME-C2	TME-C2
TCGA-VQ-A8PF	TME-C2	TME-C2	TME-C2
TCGA-BR-8361	TME-C2	TME-C2	TME-C2
TCGA-MX-A5UJ	TME-C2	TME-C2	TME-C1
TCGA-D7-5578	TME-C2	TME-C2	TME-C2
TCGA-SW-A7EB	TME-C2	TME-C2	TME-C2
TCGA-D7-6521	TME-C2	TME-C2	TME-C2
TCGA-CD-A48C	TME-C2	TME-C2	TME-C2
TCGA-HU-8610	TME-C2	TME-C2	TME-C2
TCGA-BR-8373	TME-C2	TME-C2	TME-C1
TCGA-B7-5818	TME-C2	TME-C2	TME-C2
TCGA-D7-A6F2	TME-C2	TME-C2	TME-C2
TCGA-RD-A7C1	TME-C2	TME-C2	TME-C2
TCGA-VQ-A91S	TME-C2	TME-C2	TME-C2
TCGA-HU-A4GY	TME-C2	TME-C2	TME-C2
TCGA-HU-8608	TME-C2	TME-C2	TME-C2
TCGA-CD-A489	TME-C2	TME-C2	TME-C2
TCGA-BR-6566	TME-C2	TME-C2	TME-C2
TCGA-BR-8286	TME-C2	TME-C2	TME-C2
TCGA-CD-8529	TME-C2	TME-C2	TME-C2
TCGA-2H-A9GK	TME-C2	TME-C2	TME-C2
TCGA-L5-A4OG	TME-C2	TME-C2	TME-C2
TCGA-L5-A88Y	TME-C2	TME-C2	TME-C2
TCGA-L5-A8NW	TME-C2	TME-C2	TME-C2
TCGA-S8-A6BV	TME-C2	TME-C2	TME-C3
TCGA-2H-A9GL	TME-C2	TME-C2	TME-C2
TCGA-JY-A938	TME-C2	TME-C2	TME-C2
TCGA-L5-A8NU	TME-C2	TME-C2	TME-C2
TCGA-2H-A9GG	TME-C2	TME-C2	TME-C2
TCGA-Q9-A6FW	TME-C2	TME-C2	TME-C2
TCGA-IC-A6RE	TME-C2	TME-C2	TME-C2
TCGA-JY-A93D	TME-C2	TME-C2	TME-C2
TCGA-R6-A8W5	TME-C2	TME-C2	TME-C2
TCGA-L5-A8NS	TME-C2	TME-C2	TME-C2
TCGA-V5-AASX	TME-C2	TME-C2	TME-C2
TCGA-JY-A93E	TME-C2	TME-C2	TME-C2
TCGA-L5-A4OU	TME-C2	TME-C2	TME-C2
TCGA-R6-A8WG	TME-C2	TME-C2	TME-C2
TCGA-L5-A8NV	TME-C2	TME-C2	TME-C2
TCGA-L5-A4OP	TME-C2	TME-C2	TME-C1
TCGA-L5-A4OT	TME-C2	TME-C2	TME-C2
TCGA-L5-A4OS	TME-C2	TME-C2	TME-C2
TCGA-L5-A8NG	TME-C2	TME-C2	TME-C2
TCGA-L5-A8NM	TME-C2	TME-C2	TME-C2
TCGA-L5-A8NT	TME-C2	TME-C2	TME-C2
TCGA-R6-A6KZ	TME-C2	TME-C2	TME-C2
TCGA-L5-A43C	TME-C2	TME-C2	TME-C2
TCGA-R6-A6DQ	TME-C2	TME-C2	TME-C2
TCGA-L5-A4OE	TME-C2	TME-C2	TME-C2
TCGA-L5-A4OO	TME-C2	TME-C2	TME-C2
TCGA-DM-A288	TME-C3	TME-C3	TME-C3
TCGA-QL-A97D	TME-C3	TME-C3	TME-C3
TCGA-CM-6164	TME-C3	TME-C3	TME-C3
TCGA-G4-6299	TME-C3	TME-C2	TME-C3
TCGA-F4-6463	TME-C3	TME-C3	TME-C3
TCGA-DM-A1D9	TME-C3	TME-C3	TME-C3
TCGA-CM-6165	TME-C3	TME-C3	TME-C3
TCGA-CM-4751	TME-C3	TME-C2	TME-C3
TCGA-A6-5659	TME-C3	TME-C3	TME-C3
TCGA-AZ-4682	TME-C3	TME-C3	TME-C3
TCGA-DM-A0XF	TME-C3	TME-C3	TME-C3
TCGA-CA-6715	TME-C3	TME-C3	TME-C3
TCGA-DM-A28E	TME-C3	TME-C3	TME-C3
TCGA-D5-6538	TME-C3	TME-C3	TME-C3
TCGA-AA-3506	TME-C3	TME-C3	TME-C3
TCGA-AU-3779	TME-C3	TME-C3	TME-C3
TCGA-QG-A5Z1	TME-C3	TME-C3	TME-C3
TCGA-AD-6890	TME-C3	TME-C3	TME-C3
TCGA-A6-2685	TME-C3	TME-C2	TME-C3
TCGA-CK-5914	TME-C3	TME-C3	TME-C3
TCGA-CA-5255	TME-C3	TME-C3	TME-C3
TCGA-A6-A5ZU	TME-C3	TME-C3	TME-C3
TCGA-NH-A50V	TME-C3	TME-C3	TME-C3
TCGA-QG-A5YX	TME-C3	TME-C3	TME-C3
TCGA-A6-6649	TME-C3	TME-C3	TME-C3
TCGA-NH-A6GC	TME-C3	TME-C3	TME-C3
TCGA-A6-4105	TME-C3	TME-C2	TME-C3
TCGA-A6-6141	TME-C3	TME-C2	TME-C3
TCGA-AZ-4684	TME-C3	TME-C3	TME-C3
TCGA-CK-6747	TME-C3	TME-C3	TME-C3
TCGA-AU-6004	TME-C3	TME-C2	TME-C3
TCGA-QG-A5Z2	TME-C3	TME-C2	TME-C3
TCGA-F4-6459	TME-C3	TME-C3	TME-C3
TCGA-NH-A8F7	TME-C3	TME-C3	TME-C3
TCGA-G4-6321	TME-C3	TME-C3	TME-C3
TCGA-DM-A1D0	TME-C3	TME-C3	TME-C3
TCGA-G4-6307	TME-C3	TME-C3	TME-C3
TCGA-DM-A1HB	TME-C3	TME-C3	TME-C3
TCGA-CM-6679	TME-C3	TME-C3	TME-C3
TCGA-AY-6197	TME-C3	TME-C3	TME-C3
TCGA-A6-2684	TME-C3	TME-C3	TME-C3
TCGA-AD-6548	TME-C3	TME-C3	TME-C3
TCGA-D5-6539	TME-C3	TME-C3	TME-C3
TCGA-G4-6302	TME-C3	TME-C2	TME-C3
TCGA-AZ-4614	TME-C3	TME-C3	TME-C3
TCGA-NH-A5IV	TME-C3	TME-C3	TME-C3
TCGA-A6-5664	TME-C3	TME-C3	TME-C3
TCGA-AZ-4315	TME-C3	TME-C3	TME-C3
TCGA-F4-6806	TME-C3	TME-C3	TME-C3
TCGA-AY-A71X	TME-C3	TME-C3	TME-C3
TCGA-DM-A28F	TME-C3	TME-C3	TME-C3
TCGA-G4-6293	TME-C3	TME-C2	TME-C3
TCGA-5M-AAT4	TME-C3	TME-C3	TME-C3
TCGA-D5-6533	TME-C3	TME-C3	TME-C3
TCGA-A6-5657	TME-C3	TME-C2	TME-C3
TCGA-DM-A28K	TME-C3	TME-C3	TME-C3
TCGA-CM-5344	TME-C3	TME-C3	TME-C3
TCGA-G4-6309	TME-C3	TME-C3	TME-C3
TCGA-AY-6386	TME-C3	TME-C3	TME-C3
TCGA-AA-A01X	TME-C3	TME-C3	TME-C3
TCGA-CM-6677	TME-C3	TME-C3	TME-C3
TCGA-CM-5861	TME-C3	TME-C3	TME-C3
TCGA-D5-6923	TME-C3	TME-C3	TME-C3
TCGA-AZ-6605	TME-C3	TME-C2	TME-C3
TCGA-NH-A6GB	TME-C3	TME-C3	TME-C3
TCGA-CM-5349	TME-C3	TME-C3	TME-C3
TCGA-NH-A50U	TME-C3	TME-C3	TME-C3
TCGA-G4-6627	TME-C3	TME-C2	TME-C3
TCGA-DM-A28G	TME-C3	TME-C3	TME-C3
TCGA-D5-6537	TME-C3	TME-C3	TME-C3
TCGA-D5-5539	TME-C3	TME-C3	TME-C3
TCGA-CM-6163	TME-C3	TME-C2	TME-C3
TCGA-CM-4744	TME-C3	TME-C3	TME-C3
TCGA-CK-4947	TME-C3	TME-C2	TME-C3
TCGA-CA-5256	TME-C3	TME-C3	TME-C3
TCGA-CM-6167	TME-C3	TME-C2	TME-C3
TCGA-4N-A93T	TME-C3	TME-C3	TME-C3
TCGA-CA-5797	TME-C3	TME-C3	TME-C3
TCGA-CM-6166	TME-C3	TME-C3	TME-C3
TCGA-CK-4951	TME-C3	TME-C2	TME-C3
TCGA-CA-6719	TME-C3	TME-C3	TME-C3
TCGA-A6-5666	TME-C3	TME-C3	TME-C3
TCGA-AY-5543	TME-C3	TME-C3	TME-C3
TCGA-F4-6704	TME-C3	TME-C3	TME-C3
TCGA-A6-6781	TME-C3	TME-C2	TME-C3
TCGA-D5-6920	TME-C3	TME-C3	TME-C3
TCGA-D5-5538	TME-C3	TME-C2	TME-C3
TCGA-A6-6782	TME-C3	TME-C3	TME-C3
TCGA-G4-6311	TME-C3	TME-C3	TME-C3
TCGA-AZ-5403	TME-C3	TME-C3	TME-C3
TCGA-AD-6888	TME-C3	TME-C3	TME-C3
TCGA-DM-A1D6	TME-C3	TME-C3	TME-C3
TCGA-AA-3660	TME-C3	TME-C3	TME-C3
TCGA-CM-5863	TME-C3	TME-C3	TME-C3
TCGA-AZ-6598	TME-C3	TME-C3	TME-C3
TCGA-G4-6304	TME-C3	TME-C3	TME-C3
TCGA-DM-A285	TME-C3	TME-C3	TME-C3
TCGA-G4-6294	TME-C3	TME-C3	TME-C3
TCGA-DM-A1D4	TME-C3	TME-C3	TME-C3
TCGA-CA-6716	TME-C3	TME-C3	TME-C3
TCGA-CK-4952	TME-C3	TME-C3	TME-C3
TCGA-D5-6541	TME-C3	TME-C2	TME-C3
TCGA-D5-6532	TME-C3	TME-C3	TME-C3
TCGA-D5-5541	TME-C3	TME-C3	TME-C3
TCGA-DM-A1DB	TME-C3	TME-C3	TME-C3
TCGA-D5-6530	TME-C3	TME-C2	TME-C3
TCGA-CM-5868	TME-C3	TME-C3	TME-C3
TCGA-AA-3526	TME-C3	TME-C2	TME-C3
TCGA-DM-A28M	TME-C3	TME-C3	TME-C3
TCGA-D5-6926	TME-C3	TME-C3	TME-C3
TCGA-G4-6317	TME-C3	TME-C3	TME-C3
TCGA-CM-6680	TME-C3	TME-C3	TME-C3
TCGA-D5-6536	TME-C3	TME-C3	TME-C3
TCGA-AD-A5EK	TME-C3	TME-C3	TME-C3
TCGA-AA-3663	TME-C3	TME-C3	TME-C3
TCGA-AZ-6607	TME-C3	TME-C3	TME-C3
TCGA-AZ-5407	TME-C3	TME-C3	TME-C3
TCGA-CM-5348	TME-C3	TME-C3	TME-C3
TCGA-CK-6751	TME-C3	TME-C3	TME-C3
TCGA-D5-6929	TME-C3	TME-C3	TME-C3
TCGA-AA-3675	TME-C3	TME-C3	TME-C3
TCGA-DM-A282	TME-C3	TME-C3	TME-C3
TCGA-D5-7000	TME-C3	TME-C3	TME-C3
TCGA-AM-5821	TME-C3	TME-C2	TME-C3
TCGA-G4-6298	TME-C3	TME-C3	TME-C3
TCGA-NH-A8F8	TME-C3	TME-C3	TME-C3
TCGA-CK-5912	TME-C3	TME-C3	TME-C3
TCGA-AD-6895	TME-C3	TME-C2	TME-C3
TCGA-CM-6678	TME-C3	TME-C3	TME-C3
TCGA-CM-5860	TME-C3	TME-C3	TME-C3
TCGA-A6-5661	TME-C3	TME-C3	TME-C3
TCGA-DM-A1DA	TME-C3	TME-C3	TME-C3
TCGA-AZ-6599	TME-C3	TME-C3	TME-C3
TCGA-CM-6171	TME-C3	TME-C3	TME-C3
TCGA-CM-4743	TME-C3	TME-C3	TME-C3
TCGA-NH-A6GA	TME-C3	TME-C3	TME-C3
TCGA-A6-2675	TME-C3	TME-C2	TME-C3
TCGA-G4-6297	TME-C3	TME-C3	TME-C3
TCGA-A6-5656	TME-C3	TME-C3	TME-C3
TCGA-DM-A0X9	TME-C3	TME-C3	TME-C3
TCGA-DM-A0XD	TME-C3	TME-C3	TME-C3
TCGA-AA-3511	TME-C3	TME-C3	TME-C3
TCGA-A6-A56B	TME-C3	TME-C3	TME-C3
TCGA-A6-5667	TME-C3	TME-C3	TME-C3
TCGA-CM-6674	TME-C3	TME-C3	TME-C3
TCGA-DM-A1D8	TME-C3	TME-C3	TME-C3
TCGA-CM-6170	TME-C3	TME-C3	TME-C3
TCGA-AZ-4616	TME-C3	TME-C3	TME-C3
TCGA-WS-AB45	TME-C3	TME-C2	TME-C3
TCGA-CM-5864	TME-C3	TME-C3	TME-C3
TCGA-CA-5254	TME-C3	TME-C3	TME-C3
TCGA-D5-6898	TME-C3	TME-C3	TME-C3
TCGA-DM-A280	TME-C3	TME-C3	TME-C3
TCGA-QG-A5YW	TME-C3	TME-C3	TME-C3
TCGA-AD-6965	TME-C3	TME-C3	TME-C3
TCGA-CK-4948	TME-C3	TME-C3	TME-C3
TCGA-DM-A1HA	TME-C3	TME-C3	TME-C3
TCGA-5M-AAT5	TME-C3	TME-C3	TME-C3
TCGA-F4-6809	TME-C3	TME-C3	TME-C3
TCGA-D5-6531	TME-C3	TME-C2	TME-C3
TCGA-AM-5820	TME-C3	TME-C3	TME-C3
TCGA-AA-A02K	TME-C3	TME-C3	TME-C3
TCGA-AD-6889	TME-C3	TME-C3	TME-C3
TCGA-D5-6931	TME-C3	TME-C3	TME-C3
TCGA-D5-6924	TME-C3	TME-C2	TME-C3
TCGA-A6-5665	TME-C3	TME-C3	TME-C3
TCGA-5M-AATA	TME-C3	TME-C3	TME-C3
TCGA-D5-6540	TME-C3	TME-C3	TME-C3
TCGA-G4-6323	TME-C3	TME-C3	TME-C3
TCGA-A6-A566	TME-C3	TME-C2	TME-C3
TCGA-AA-3712	TME-C3	TME-C3	TME-C3
TCGA-A6-5662	TME-C3	TME-C3	TME-C3
TCGA-CM-6676	TME-C3	TME-C3	TME-C3
TCGA-CK-5915	TME-C3	TME-C3	TME-C3
TCGA-F4-6569	TME-C3	TME-C2	TME-C3
TCGA-F4-6461	TME-C3	TME-C3	TME-C3
TCGA-F4-6854	TME-C3	TME-C3	TME-C3
TCGA-F4-6856	TME-C3	TME-C3	TME-C3
TCGA-AY-A54L	TME-C3	TME-C3	TME-C3
TCGA-CK-6746	TME-C3	TME-C2	TME-C3
TCGA-AA-3509	TME-C3	TME-C3	TME-C3
TCGA-A6-6650	TME-C3	TME-C3	TME-C3
TCGA-A6-6140	TME-C3	TME-C3	TME-C3
TCGA-A6-2682	TME-C3	TME-C3	TME-C3
TCGA-CM-6675	TME-C3	TME-C3	TME-C3
TCGA-DM-A1D7	TME-C3	TME-C3	TME-C3
TCGA-4T-AA8H	TME-C3	TME-C3	TME-C3
TCGA-A6-6653	TME-C3	TME-C3	TME-C3
TCGA-F4-6460	TME-C3	TME-C3	TME-C3
TCGA-AA-3655	TME-C3	TME-C3	TME-C3
TCGA-T9-A92H	TME-C3	TME-C3	TME-C3
TCGA-AY-A8YK	TME-C3	TME-C3	TME-C3
TCGA-CK-4950	TME-C3	TME-C3	TME-C3
TCGA-AZ-6600	TME-C3	TME-C3	TME-C3
TCGA-AZ-6606	TME-C3	TME-C3	TME-C3
TCGA-D5-6922	TME-C3	TME-C3	TME-C3
TCGA-A6-6137	TME-C3	TME-C3	TME-C3
TCGA-AA-3495	TME-C3	TME-C3	TME-C3
TCGA-G4-6322	TME-C3	TME-C3	TME-C3
TCGA-SS-A7HO	TME-C3	TME-C3	TME-C3
TCGA-AD-A5EJ	TME-C3	TME-C3	TME-C3
TCGA-AA-A02Y	TME-C3	TME-C3	TME-C3
TCGA-AZ-6603	TME-C3	TME-C3	TME-C3
TCGA-G4-6626	TME-C3	TME-C3	TME-C3
TCGA-G4-6306	TME-C3	TME-C3	TME-C3
TCGA-G4-6320	TME-C3	TME-C3	TME-C3
TCGA-CK-6748	TME-C3	TME-C3	TME-C3
TCGA-A6-6142	TME-C3	TME-C3	TME-C3
TCGA-CA-5796	TME-C3	TME-C3	TME-C3
TCGA-A6-A567	TME-C3	TME-C3	TME-C3
TCGA-AA-3713	TME-C3	TME-C2	TME-C3
TCGA-A6-6648	TME-C3	TME-C3	TME-C3
TCGA-A6-5660	TME-C3	TME-C3	TME-C3
TCGA-5M-AATE	TME-C3	TME-C3	TME-C3
TCGA-CM-6161	TME-C3	TME-C3	TME-C3
TCGA-AZ-4313	TME-C3	TME-C3	TME-C3
TCGA-A6-6652	TME-C3	TME-C3	TME-C3
TCGA-F4-6808	TME-C3	TME-C3	TME-C3
TCGA-DM-A28C	TME-C3	TME-C3	TME-C3
TCGA-D5-6927	TME-C3	TME-C3	TME-C3
TCGA-AA-3492	TME-C3	TME-C3	TME-C3
TCGA-D5-6535	TME-C3	TME-C3	TME-C3
TCGA-AD-6963	TME-C3	TME-C3	TME-C3
TCGA-CM-4747	TME-C3	TME-C3	TME-C3
TCGA-NH-A50T	TME-C3	TME-C3	TME-C3
TCGA-CM-6168	TME-C3	TME-C2	TME-C3
TCGA-RU-A8FL	TME-C3	TME-C3	TME-C3
TCGA-AY-A69D	TME-C3	TME-C3	TME-C3
TCGA-AA-A01Z	TME-C3	TME-C3	TME-C3
TCGA-DM-A28H	TME-C3	TME-C3	TME-C3
TCGA-G4-6586	TME-C3	TME-C3	TME-C3
TCGA-G4-6315	TME-C3	TME-C3	TME-C3
TCGA-G4-6303	TME-C3	TME-C3	TME-C3
TCGA-F4-6805	TME-C3	TME-C3	TME-C3
TCGA-D5-5537	TME-C3	TME-C3	TME-C3
TCGA-CM-5862	TME-C3	TME-C3	TME-C3
TCGA-D5-6932	TME-C3	TME-C3	TME-C3
TCGA-DM-A28A	TME-C3	TME-C3	TME-C3
TCGA-CM-6172	TME-C3	TME-C3	TME-C3
TCGA-D5-6930	TME-C3	TME-C2	TME-C3
TCGA-CK-5913	TME-C3	TME-C3	TME-C3
TCGA-AA-3496	TME-C3	TME-C2	TME-C3
TCGA-D5-5540	TME-C3	TME-C3	TME-C3
TCGA-AD-6901	TME-C3	TME-C2	TME-C3
TCGA-F4-6855	TME-C3	TME-C3	TME-C3
TCGA-AD-5900	TME-C3	TME-C2	TME-C3
TCGA-3L-AA1B	TME-C3	TME-C3	TME-C3
TCGA-AA-3502	TME-C3	TME-C3	TME-C3
TCGA-G4-6295	TME-C3	TME-C2	TME-C3
TCGA-G4-6588	TME-C3	TME-C3	TME-C3
TCGA-QG-A5YV	TME-C3	TME-C3	TME-C3
TCGA-EI-6884	TME-C3	TME-C3	TME-C3
TCGA-DC-6154	TME-C3	TME-C3	TME-C3
TCGA-DY-A1DD	TME-C3	TME-C3	TME-C3
TCGA-AG-4022	TME-C3	TME-C2	TME-C3
TCGA-AH-6549	TME-C3	TME-C3	TME-C3
TCGA-AH-6903	TME-C3	TME-C3	TME-C3
TCGA-F5-6863	TME-C3	TME-C3	TME-C3
TCGA-AF-5654	TME-C3	TME-C3	TME-C3
TCGA-DY-A1DE	TME-C3	TME-C3	TME-C3
TCGA-AH-6544	TME-C3	TME-C3	TME-C3
TCGA-DY-A1H8	TME-C3	TME-C3	TME-C3
TCGA-EI-7004	TME-C3	TME-C3	TME-C3
TCGA-AF-6136	TME-C3	TME-C3	TME-C3
TCGA-DC-4745	TME-C3	TME-C3	TME-C3
TCGA-EI-6883	TME-C3	TME-C3	TME-C3
TCGA-EI-6917	TME-C3	TME-C2	TME-C3
TCGA-F5-6861	TME-C3	TME-C3	TME-C3
TCGA-EI-6508	TME-C3	TME-C3	TME-C3
TCGA-F5-6465	TME-C3	TME-C2	TME-C3
TCGA-AF-6672	TME-C3	TME-C3	TME-C3
TCGA-EI-6509	TME-C3	TME-C3	TME-C3
TCGA-DC-5337	TME-C3	TME-C3	TME-C3
TCGA-DC-6160	TME-C3	TME-C3	TME-C3
TCGA-G5-6641	TME-C3	TME-C3	TME-C3
TCGA-F5-6812	TME-C3	TME-C2	TME-C3
TCGA-AH-6644	TME-C3	TME-C3	TME-C3
TCGA-AG-3592	TME-C3	TME-C3	TME-C3
TCGA-F5-6814	TME-C3	TME-C2	TME-C3
TCGA-EI-6513	TME-C3	TME-C3	TME-C3
TCGA-DC-6158	TME-C3	TME-C2	TME-C3
TCGA-EI-6512	TME-C3	TME-C3	TME-C3
TCGA-CI-6622	TME-C3	TME-C3	TME-C3
TCGA-DY-A1DC	TME-C3	TME-C3	TME-C3
TCGA-DT-5265	TME-C3	TME-C3	TME-C3
TCGA-AG-3742	TME-C3	TME-C3	TME-C3
TCGA-DC-6683	TME-C3	TME-C3	TME-C3
TCGA-AF-6655	TME-C3	TME-C3	TME-C3
TCGA-CL-5918	TME-C3	TME-C3	TME-C3
TCGA-F5-6864	TME-C3	TME-C3	TME-C3
TCGA-AF-A56K	TME-C3	TME-C3	TME-C3
TCGA-AG-4021	TME-C3	TME-C3	TME-C3
TCGA-DC-5869	TME-C3	TME-C3	TME-C3
TCGA-DY-A0XA	TME-C3	TME-C3	TME-C3
TCGA-EF-5831	TME-C3	TME-C3	TME-C3
TCGA-AG-3725	TME-C3	TME-C3	TME-C3
TCGA-EI-6514	TME-C3	TME-C3	TME-C3
TCGA-CI-6624	TME-C3	TME-C2	TME-C3
TCGA-CI-6620	TME-C3	TME-C3	TME-C3
TCGA-CI-6621	TME-C3	TME-C3	TME-C3
TCGA-EI-6510	TME-C3	TME-C3	TME-C3
TCGA-DY-A1DG	TME-C3	TME-C3	TME-C3
TCGA-AF-A56N	TME-C3	TME-C3	TME-C3
TCGA-EI-6885	TME-C3	TME-C3	TME-C3
TCGA-AG-3732	TME-C3	TME-C2	TME-C3
TCGA-EI-6882	TME-C3	TME-C3	TME-C3
TCGA-AF-2693	TME-C3	TME-C3	TME-C3
TCGA-DC-6157	TME-C3	TME-C3	TME-C3
TCGA-AF-4110	TME-C3	TME-C2	TME-C3
TCGA-AG-3591	TME-C3	TME-C3	TME-C3
TCGA-EI-6881	TME-C3	TME-C3	TME-C3
TCGA-DC-6682	TME-C3	TME-C3	TME-C3
TCGA-F5-6813	TME-C3	TME-C3	TME-C3
TCGA-F5-6702	TME-C3	TME-C3	TME-C3
TCGA-CL-5917	TME-C3	TME-C3	TME-C3
TCGA-CL-4957	TME-C3	TME-C3	TME-C3
TCGA-EI-6507	TME-C3	TME-C3	TME-C3
TCGA-DC-4749	TME-C3	TME-C3	TME-C3
TCGA-EF-5830	TME-C3	TME-C3	TME-C3
TCGA-AF-3911	TME-C3	TME-C3	TME-C3
TCGA-DC-6155	TME-C3	TME-C3	TME-C3
TCGA-DC-6681	TME-C3	TME-C3	TME-C3
TCGA-AF-A56L	TME-C3	TME-C3	TME-C3
TCGA-CI-6623	TME-C3	TME-C3	TME-C3
TCGA-AH-6897	TME-C3	TME-C3	TME-C3
TCGA-EI-7002	TME-C3	TME-C3	TME-C3
TCGA-EI-6506	TME-C3	TME-C3	TME-C3
TCGA-AH-6643	TME-C3	TME-C3	TME-C3
TCGA-DY-A1DF	TME-C3	TME-C3	TME-C3
TCGA-F5-6571	TME-C3	TME-C2	TME-C3
TCGA-F5-6811	TME-C3	TME-C3	TME-C3
TCGA-F5-6810	TME-C3	TME-C3	TME-C3
TCGA-CI-6619	TME-C3	TME-C3	TME-C3
TCGA-VQ-AA69	TME-C3	TME-C2	TME-C1
TCGA-VQ-A91A	TME-C3	TME-C2	TME-C1
TCGA-IN-8663	TME-C3	TME-C3	TME-C1
TCGA-FP-7829	TME-C3	TME-C3	TME-C1
TCGA-BR-6801	TME-C3	TME-C2	TME-C1
TCGA-ZR-A9CJ	TME-C3	TME-C2	TME-C1
TCGA-L5-A8NL	TME-C3	TME-C2	TME-C3
TCGA-2H-A9GF	TME-C3	TME-C3	TME-C1
TCGA-2H-A9GQ	TME-C3	TME-C1	TME-C1

## Sheet: Supplementary Table 13
Supplementary Table 13. The signatures that differentiate three TME clusters.
event_class	gene_signature
gene_feature1	Wolf_IL8_21978456
gene_feature1	Wolf_Bcell_21978456
gene_feature1	Wolf_GRANS_PCA_16704732
gene_feature1	Wolf_LYMPHS_PCA_16704732
gene_feature1	Wolf_Module11_Prolif_score
gene_feature1	c7atoms_C7_Atom_1
gene_feature1	c7atoms_C7_Atom_4
gene_feature1	c7atoms_C7_Atom_8
gene_feature1	c7atoms_C7_Atom_10
gene_feature1	c7atoms_C7_Atom_11
gene_feature1	c7atoms_C7_Atom_12
gene_feature1	c7atoms_C7_Atom_16
gene_feature1	c7atoms_C7_Atom_18
gene_feature1	c7atoms_C7_Atom_20
gene_feature1	c7atoms_C7_Atom_21
gene_feature1	c7atoms_C7_Atom_22
gene_feature1	c7atoms_C7_Atom_25
gene_feature1	c7atoms_C7_Atom_27
gene_feature1	c7atoms_C7_Atom_30
gene_feature1	c7atoms_C7_Atom_31
gene_feature1	Bindea_NK CD56dim cells
gene_feature1	Bindea_Th17 cells
gene_feature1	Cibersort_Plasma.cells
gene_feature1	Cibersort_T.cells.follicular.helper
gene_feature1	Cibersort_NK.cells.activated
gene_feature1	Cibersort_Monocytes
gene_feature1	Cibersort_Macrophages.M2
gene_feature1	Cibersort_Dendritic.cells.activated
gene_feature1	Cibersort_Mast.cells.activated
gene_feature2	Senbabaoglu_Angiogenesis
gene_feature2	Senbabaoglu_APM2
gene_feature2	Wolf_ICS5_score
gene_feature2	Wolf_LIexpression_score
gene_feature2	Wolf_Chemokine12_score
gene_feature2	Wolf_NHI_5gene_score
gene_feature2	Wolf_CD68
gene_feature2	Wolf_CD8A
gene_feature2	Wolf_PD1_data
gene_feature2	Wolf_PDL1_data
gene_feature2	Wolf_PD1_PDL1_score
gene_feature2	Wolf_CTLA4_data
gene_feature2	Wolf_Bcell_mg_IGJ
gene_feature2	Wolf_Bcell_receptors_score
gene_feature2	Wolf_STAT1_score
gene_feature2	Wolf_CSF1_response
gene_feature2	Wolf_TcClassII_score
gene_feature2	Wolf_IL12_score_21050467
gene_feature2	Wolf_IL4_score_21050467
gene_feature2	Wolf_IL2_score_21050467
gene_feature2	Wolf_IL13_score_21050467
gene_feature2	Wolf_IFNG_score_21050467
gene_feature2	Wolf_TGFB_score_21050467
gene_feature2	Wolf_TREM1_data
gene_feature2	Wolf_DAP12_data
gene_feature2	Wolf_Tcell_receptors_score
gene_feature2	Wolf_IFN_21978456
gene_feature2	Wolf_MHC1_21978456
gene_feature2	Wolf_MHC2_21978456
gene_feature2	Wolf_Tcell_21978456
gene_feature2	Wolf_CD103pos_mean_25446897
gene_feature2	Wolf_CD103neg_mean_25446897
gene_feature2	Wolf_IgG_19272155
gene_feature2	Wolf_Interferon_19272155
gene_feature2	Wolf_LCK_19272155
gene_feature2	Wolf_MHC.I_19272155
gene_feature2	Wolf_MHC.II_19272155
gene_feature2	Wolf_STAT1_19272155
gene_feature2	Wolf_Troester_WoundSig_19887484
gene_feature2	Wolf_MDACC.FNA.1_20805453
gene_feature2	Wolf_IGG_Cluster_21214954
gene_feature2	Wolf_Minterferon_Cluster_21214954
gene_feature2	Wolf_Immune_cell_Cluster_21214954
gene_feature2	Wolf_MCD3_CD8_21214954
gene_feature2	Wolf_Interferon_Cluster_21214954
gene_feature2	Wolf_B_cell_PCA_16704732
gene_feature2	Wolf_CD8_PCA_16704732
gene_feature2	Wolf_T_cell_PCA_16704732
gene_feature2	Wolf_TGFB_PCA_17349583
gene_feature2	Wolf_HER2_Immune_PCA_18006808
gene_feature2	Wolf_IR7_score
gene_feature2	Wolf_Buck14_score
gene_feature2	Wolf_TAMsurr_score
gene_feature2	Wolf_Immune_NSCLC_score
gene_feature2	Wolf_Module3_IFN_score
gene_feature2	Wolf_Module4_TcellBcell_score
gene_feature2	Wolf_Module5_TcellBcell_score
gene_feature2	Wolf_GP11_Immune_IFN
gene_feature2	Wolf_KEGG_HEMATOPOIETIC_CELL_LINEAGE
gene_feature2	Wolf_CD8_CD68_ratio
gene_feature2	Attractors_LYM
gene_feature2	Attractors_IFIT3
gene_feature2	Attractors_G_GIMAP4
gene_feature2	Attractors_G_HLA-DPA1
gene_feature2	Attractors_G_SLAMF6
gene_feature2	Attractors_G_LILRB4
gene_feature2	Attractors_G_SIGLEC9
gene_feature2	Attractors_G_CYTH4
gene_feature2	Attractors_G_CD3E
gene_feature2	ICR_ICR_SCORE
gene_feature2	ICR_ICR_INHIB_SCORE
gene_feature2	ICR_ICR_ACT_SCORE
gene_feature2	Bindea_aDC
gene_feature2	Bindea_Cytotoxic cells
gene_feature2	Bindea_DC
gene_feature2	Bindea_Lymph vessels
gene_feature2	Bindea_Macrophages
gene_feature2	Bindea_Mast cells
gene_feature2	Bindea_T cells
gene_feature2	Bindea_Treg cells
gene_feature2	Cibersort_B.cells.naive
gene_feature2	Cibersort_T.cells.CD8
gene_feature2	Cibersort_T.cells.CD4.memory.activated
gene_feature2	Cibersort_T.cells.regulatory..Tregs.
gene_feature2	Cibersort_Macrophages.M1
gene_feature2	Cibersort_Dendritic.cells.resting
gene_feature2	Cibersort_Mast.cells.resting
gene_feature3	Senbabaoglu_APM1
gene_feature3	Wolf_Rotterdam_ERneg_PCA_15721472
gene_feature3	Wolf_TAMsurr_TcClassII_ratio
gene_feature3	Wolf_CHANG_CORE_SERUM_RESPONSE_UP
gene_feature3	Wolf_CSR_Activated_15701700
gene_feature3	Wolf_CD103pos_CD103neg_ratio_25446897
gene_feature3	c7atoms_C7_Atom_2
gene_feature3	c7atoms_C7_Atom_3
gene_feature3	c7atoms_C7_Atom_5
gene_feature3	c7atoms_C7_Atom_6
gene_feature3	c7atoms_C7_Atom_7
gene_feature3	c7atoms_C7_Atom_9
gene_feature3	c7atoms_C7_Atom_13
gene_feature3	c7atoms_C7_Atom_14
gene_feature3	c7atoms_C7_Atom_15
gene_feature3	c7atoms_C7_Atom_17
gene_feature3	c7atoms_C7_Atom_19
gene_feature3	c7atoms_C7_Atom_23
gene_feature3	c7atoms_C7_Atom_24
gene_feature3	c7atoms_C7_Atom_26
gene_feature3	c7atoms_C7_Atom_28
gene_feature3	c7atoms_C7_Atom_29
gene_feature3	c7atoms_C7_Atom_32
gene_feature3	Bindea_B cells
gene_feature3	Bindea_CD8 T cells
gene_feature3	Bindea_Eosinophils
gene_feature3	Bindea_iDC
gene_feature3	Bindea_Neutrophils
gene_feature3	Bindea_NK CD56bright cells
gene_feature3	Bindea_NK cells
gene_feature3	Bindea_pDC
gene_feature3	Bindea_T helper cells
gene_feature3	Bindea_Tcm cells
gene_feature3	Bindea_Tem cells
gene_feature3	Bindea_Tfh cells
gene_feature3	Bindea_Tgd cells
gene_feature3	Bindea_Th1 cells
gene_feature3	Bindea_Th2 cells
gene_feature3	Cibersort_B.cells.memory
gene_feature3	Cibersort_T.cells.CD4.memory.resting
gene_feature3	Cibersort_NK.cells.resting
gene_feature3	Cibersort_Macrophages.M0

## Sheet: Supplementary Table 14
Supplementary Table 14. The clinical and genomic characteristics of patients from three subgroups.
patient	patient_class	acronym	pathologic_stage	cancer dna fraction	shannon
TCGA-AA-3549-01	TME-C1	COAD	Stage I	0.75	2.68595
TCGA-AY-4071-01	TME-C1	COAD	Stage I	0.71	3.92895
TCGA-CM-4752-01	TME-C1	COAD	Stage II	0.52	2.99573
TCGA-AA-3688-01	TME-C1	COAD	Stage IV	0.85	2.77259
TCGA-AA-3854-01	TME-C1	COAD	Stage I	0.88	1.84622
TCGA-A6-3809-01	TME-C1	COAD	Stage II	0.62	3.01495
TCGA-AA-3494-01	TME-C1	COAD	Stage IV	0.82	2.39331
TCGA-CM-4750-01	TME-C1	COAD	Stage III	0.78	2.36938
TCGA-AA-3529-01	TME-C1	COAD	Stage III	0.62	1.90615
TCGA-AA-3949-01	TME-C1	COAD	Stage III	0.46	1.99218
TCGA-AA-3848-01	TME-C1	COAD	Stage III	0.85	1.38629
TCGA-AA-3818-01	TME-C1	COAD	Stage II	0.82	2.69801
TCGA-AA-3710-01	TME-C1	COAD	Stage II	0.44	3.64604
TCGA-AA-3950-01	TME-C1	COAD	Stage II	0.41	2.67795
TCGA-AA-A00N-01	TME-C1	COAD	Stage II	0.43	1.94591
TCGA-AA-A00K-01	TME-C1	COAD	Stage II	0.68	2.01981
TCGA-AA-3715-01	TME-C1	COAD	Stage II	0.5	2.11871
TCGA-AA-A00W-01	TME-C1	COAD	Stage I	0.83	2.07944
TCGA-A6-2677-01	TME-C1	COAD	Stage III	0.88	0
TCGA-AA-A00R-01	TME-C1	COAD	Stage I	0.52	4.00795
TCGA-A6-2672-01	TME-C1	COAD	Stage III	0.59	3.41474
TCGA-AA-3970-01	TME-C1	COAD	Stage II	NA	2.90056
TCGA-AA-3524-01	TME-C1	COAD	Stage II	0.81	1.65645
TCGA-AA-3684-01	TME-C1	COAD	Stage IV	0.34	2.82694
TCGA-AA-3971-01	TME-C1	COAD	Stage III	0.58	3.55173
TCGA-AA-3989-01	TME-C1	COAD	Stage IV	0.69	3.34645
TCGA-AA-A00D-01	TME-C1	COAD	Stage I	0.54	3.22329
TCGA-A6-2674-01	TME-C1	COAD	Stage IV	0.35	3.17377
TCGA-AA-3510-01	TME-C1	COAD	Stage II	0.58	2.82156
TCGA-AA-3488-01	TME-C1	COAD	Stage IV	0.88	0.693147
TCGA-AA-3941-01	TME-C1	COAD	Stage IV	0.87	2.36938
TCGA-AA-3517-01	TME-C1	COAD	Stage II	0.87	2.52321
TCGA-AA-3678-01	TME-C1	COAD	Stage III	0.65	3.31949
TCGA-AA-3821-01	TME-C1	COAD	Stage I	0.73	1.54983
TCGA-AA-3530-01	TME-C1	COAD	Stage I	0.79	2.91249
TCGA-AA-A004-01	TME-C1	COAD	Stage II	0.57	1.09861
TCGA-A6-3808-01	TME-C1	COAD	Stage II	NA	2.78779
TCGA-AA-A010-01	TME-C1	COAD	Stage II	0.77	0.693147
TCGA-AA-A02J-01	TME-C1	COAD	Stage IV	0.78	0
TCGA-AA-3837-01	TME-C1	COAD	Stage II	0.6	1.60944
TCGA-AA-3521-01	TME-C1	COAD	Stage II	0.81	1.90615
TCGA-AA-A02R-01	TME-C1	COAD	Stage II	0.67	3.6842
TCGA-AA-A02O-01	TME-C1	COAD	Stage II	0.82	2.64844
TCGA-AA-3845-01	TME-C1	COAD	Stage II	0.6	2.52406
TCGA-AA-3856-01	TME-C1	COAD	Stage II	0.67	4.04335
TCGA-AA-A00Q-01	TME-C1	COAD	Stage III	0.7	2.3979
TCGA-AA-A00F-01	TME-C1	COAD	Stage III	0.56	1.94591
TCGA-AA-3815-01	TME-C1	COAD	Stage II	NA	3.95948
TCGA-AA-3867-01	TME-C1	COAD	Stage IV	0.72	2.44102
TCGA-AA-A01D-01	TME-C1	COAD	Stage III	0.53	2.35167
TCGA-A6-3807-01	TME-C1	COAD	Stage III	0.63	1.99151
TCGA-CM-5341-01	TME-C1	COAD	Stage III	0.66	2.3979
TCGA-AA-3862-01	TME-C1	COAD	Stage II	NA	2.88486
TCGA-AA-3939-01	TME-C1	COAD	Stage II	NA	2.67012
TCGA-AA-3514-01	TME-C1	COAD	Stage I	0.79	2.07944
TCGA-AA-3833-01	TME-C1	COAD	Stage II	0.4	3.13191
TCGA-AA-A00Z-01	TME-C1	COAD	Stage II	0.64	2.07944
TCGA-AA-3679-01	TME-C1	COAD	Stage IV	0.82	2.28237
TCGA-A6-4107-01	TME-C1	COAD	Stage III	0.58	3.07876
TCGA-AA-A01V-01	TME-C1	COAD	Stage I	0.8	2.619
TCGA-AA-3844-01	TME-C1	COAD	Stage III	0.84	2.57424
TCGA-AA-A01G-01	TME-C1	COAD	Stage II	0.7	1.33218
TCGA-AA-3870-01	TME-C1	COAD	Stage IV	0.62	2.54004
TCGA-AA-A00A-01	TME-C1	COAD	Stage II	1	2.55779
TCGA-AA-3855-01	TME-C1	COAD	Stage I	0.65	3.38103
TCGA-AA-3519-01	TME-C1	COAD	Stage III	0.79	1.74787
TCGA-AA-3534-01	TME-C1	COAD	Stage II	0.81	2.27187
TCGA-AA-A03J-01	TME-C1	COAD	Stage I	0.56	1.90615
TCGA-AA-A01K-01	TME-C1	COAD	Stage III	0.51	2.31315
TCGA-AA-3984-01	TME-C1	COAD	Stage II	0.64	2.93298
TCGA-AA-3520-01	TME-C1	COAD	Stage II	0.69	2.17157
TCGA-AA-3543-01	TME-C1	COAD	Stage I	0.71	3.42221
TCGA-A6-2681-01	TME-C1	COAD	Stage II	0.71	2.11928
TCGA-AA-3869-01	TME-C1	COAD	Stage IV	0.79	3.10797
TCGA-AA-A01S-01	TME-C1	COAD	Stage III	0.9	1.21301
TCGA-AA-3966-01	TME-C1	COAD	Stage II	0.66	3.86362
TCGA-A6-2676-01	TME-C1	COAD	Stage II	0.7	2.98297
TCGA-AA-3846-01	TME-C1	COAD	Stage II	0.71	3.11024
TCGA-AA-3544-01	TME-C1	COAD	Stage I	0.74	3.2286
TCGA-AA-3956-01	TME-C1	COAD	Stage II	0.54	2.65932
TCGA-AA-3532-01	TME-C1	COAD	Stage II	0.52	3.65813
TCGA-AA-3955-01	TME-C1	COAD	Stage III	0.84	1.74787
TCGA-AA-3851-01	TME-C1	COAD	Stage II	0.7	3.1839
TCGA-AA-A02F-01	TME-C1	COAD	Stage IV	0.93	NA
TCGA-AA-3861-01	TME-C1	COAD	Stage II	NA	3.04482
TCGA-AA-3522-01	TME-C1	COAD	Stage II	0.4	1.62546
TCGA-AA-A00U-01	TME-C1	COAD	Stage III	0.75	2.63906
TCGA-AA-3930-01	TME-C1	COAD	Stage IV	0.67	2.09473
TCGA-AA-3947-01	TME-C1	COAD	Stage II	0.78	0
TCGA-AA-3841-01	TME-C1	COAD	Stage II	0.73	1.48322
TCGA-AA-3814-01	TME-C1	COAD	Stage II	0.66	3.52717
TCGA-AA-3553-01	TME-C1	COAD	Stage I	0.7	3.16248
TCGA-AA-3866-01	TME-C1	COAD	Stage I	0.66	3.59869
TCGA-AA-A017-01	TME-C1	COAD	Stage II	0.59	2.09815
TCGA-AA-3994-01	TME-C1	COAD	Stage III	0.77	2.34199
TCGA-AA-3877-01	TME-C1	COAD	Stage I	0.56	3.15146
TCGA-AA-A00L-01	TME-C1	COAD	Stage II	0.8	1.60944
TCGA-AA-3696-01	TME-C1	COAD	Stage IV	0.85	0
TCGA-AA-A00O-01	TME-C1	COAD	Stage III	0.61	1.60944
TCGA-AA-3858-01	TME-C1	COAD	Stage I	0.76	2.87148
TCGA-AA-3872-01	TME-C1	COAD	Stage IV	0.67	3.05252
TCGA-AA-A01R-01	TME-C1	COAD	Stage III	0.64	3.49315
TCGA-AA-3975-01	TME-C1	COAD	Stage I	0.81	2.9222
TCGA-AA-3986-01	TME-C1	COAD	Stage I	0.59	4.16956
TCGA-AA-3831-01	TME-C1	COAD	Stage II	0.61	3.39125
TCGA-AA-A02H-01	TME-C1	COAD	Stage IV	0.8	1.09861
TCGA-AA-3548-01	TME-C1	COAD	Stage III	0.75	3.03673
TCGA-AA-3538-01	TME-C1	COAD	Stage I	0.73	2.61563
TCGA-AA-3842-01	TME-C1	COAD	Stage III	0.8	1.79176
TCGA-AZ-4308-01	TME-C1	COAD	Stage III	0.69	1.54983
TCGA-AA-3680-01	TME-C1	COAD	Stage IV	0.77	3.14613
TCGA-AA-3542-01	TME-C1	COAD	Stage III	0.92	0
TCGA-AA-A024-01	TME-C1	COAD	Stage II	0.73	1.79176
TCGA-AA-3666-01	TME-C1	COAD	Stage III	0.87	2.62505
TCGA-AA-3673-01	TME-C1	COAD	Stage II	0.75	3.10797
TCGA-AA-3952-01	TME-C1	COAD	Stage III	0.72	1.94591
TCGA-AY-4070-01	TME-C1	COAD	Stage III	0.49	2.99779
TCGA-AA-A00J-01	TME-C1	COAD	Stage III	0.82	2.68595
TCGA-AA-3667-01	TME-C1	COAD	Stage I	0.86	0
TCGA-AA-3852-01	TME-C1	COAD	Stage II	0.67	2.88905
TCGA-AA-3976-01	TME-C1	COAD	Stage III	0.78	1.55958
TCGA-AA-3811-01	TME-C1	COAD	Stage III	NA	3.30133
TCGA-AA-3819-01	TME-C1	COAD	Stage II	0.73	2.48491
TCGA-AA-A022-01	TME-C1	COAD	Stage II	0.73	3.70192
TCGA-AA-3875-01	TME-C1	COAD	Stage I	0.52	2.902
TCGA-AA-3864-01	TME-C1	COAD	Stage II	0.75	2.39591
TCGA-A6-2678-01	TME-C1	COAD	Stage III	0.8	2.35167
TCGA-AA-A01Q-01	TME-C1	COAD	Stage II	0.86	2.63906
TCGA-AA-A00E-01	TME-C1	COAD	Stage II	0.54	2.48491
TCGA-AA-A02W-01	TME-C1	COAD	Stage I	0.79	2.16396
TCGA-AA-3980-01	TME-C1	COAD	Stage I	NA	3.68898
TCGA-AA-3681-01	TME-C1	COAD	Stage III	0.61	2.76311
TCGA-A6-2671-01	TME-C1	COAD	Stage IV	0.83	0.693147
TCGA-AA-A029-01	TME-C1	COAD	Stage II	0.89	0
TCGA-AA-3518-01	TME-C1	COAD	Stage II	0.4	NA
TCGA-AA-A01T-01	TME-C1	COAD	Stage III	0.82	0
TCGA-AA-3850-01	TME-C1	COAD	Stage I	0.28	2.42259
TCGA-AA-3812-01	TME-C1	COAD	Stage II	0.47	1.56071
TCGA-A6-3810-01	TME-C1	COAD	Stage II	0.7	2.28995
TCGA-AA-3664-01	TME-C1	COAD	Stage II	0.88	1.33218
TCGA-AA-3692-01	TME-C1	COAD	Stage IV	0.82	2.96839
TCGA-AA-3968-01	TME-C1	COAD	Stage I	0.78	2.2783
TCGA-AA-3560-01	TME-C1	COAD	Stage III	0.83	2.8571
TCGA-AA-3982-01	TME-C1	COAD	Stage III	0.51	3.49218
TCGA-A6-2683-01	TME-C1	COAD	Stage IV	0.92	0.693147
TCGA-AA-3977-01	TME-C1	COAD	NON	0.73	1.74787
TCGA-AA-A01F-01	TME-C1	COAD	Stage III	0.92	1.09861
TCGA-AA-3552-01	TME-C1	COAD	Stage III	0.64	3.78275
TCGA-AA-3979-01	TME-C1	COAD	Stage II	0.92	1.33218
TCGA-AA-A01I-01	TME-C1	COAD	Stage I	0.74	2.3947
TCGA-AA-A03F-01	TME-C1	COAD	Stage III	0.78	0.673012
TCGA-AA-3693-01	TME-C1	COAD	Stage IV	0.91	1.79176
TCGA-AA-A02E-01	TME-C1	COAD	Stage IV	0.8	1.74787
TCGA-CM-4746-01	TME-C1	COAD	Stage I	0.82	0.693147
TCGA-AA-A01C-01	TME-C1	COAD	Stage III	0.69	1.38629
TCGA-A6-2680-01	TME-C1	COAD	Stage II	0.68	2.59861
TCGA-AA-3561-01	TME-C1	COAD	Stage II	0.91	1.83102
TCGA-AA-3525-01	TME-C1	COAD	Stage III	0.64	2.30259
TCGA-AA-3531-01	TME-C1	COAD	Stage II	0.93	1.56071
TCGA-AA-3973-01	TME-C1	COAD	Stage IV	0.92	2.45831
TCGA-AA-3527-01	TME-C1	COAD	Stage II	0.77	2.82156
TCGA-AA-3555-01	TME-C1	COAD	Stage II	0.74	1.74787
TCGA-AG-A025-01	TME-C1	READ	Stage I	0.77	1.94591
TCGA-AG-3582-01	TME-C1	READ	Stage IV	0.83	2.50529
TCGA-AG-3609-01	TME-C1	READ	Stage III	0.74	2.84505
TCGA-AG-A01L-01	TME-C1	READ	Stage III	0.87	1.94591
TCGA-AG-A01W-01	TME-C1	READ	Stage II	0.7	2.09473
TCGA-AG-A02N-01	TME-C1	READ	Stage II	0.84	0.636514
TCGA-AG-3727-01	TME-C1	READ	Stage III	0.88	1.33218
TCGA-AG-3887-01	TME-C1	READ	Stage II	0.84	2.36074
TCGA-AG-A01J-01	TME-C1	READ	Stage II	0.52	1.94591
TCGA-AG-4015-01	TME-C1	READ	Stage II	0.85	2.20479
TCGA-AG-A011-01	TME-C1	READ	Stage II	0.54	2.45831
TCGA-AG-4008-01	TME-C1	READ	Stage II	0.67	2.27187
TCGA-AG-A032-01	TME-C1	READ	Stage III	0.8	1.36937
TCGA-AG-A020-01	TME-C1	READ	Stage III	0.87	1.38629
TCGA-AG-A026-01	TME-C1	READ	Stage II	0.93	1.60944
TCGA-AG-3883-01	TME-C1	READ	Stage I	0.66	2.3979
TCGA-AG-3885-01	TME-C1	READ	Stage III	0.84	2.15132
TCGA-AG-3893-01	TME-C1	READ	Stage III	0.74	2.16396
TCGA-AG-A02G-01	TME-C1	READ	Stage IV	0.86	2.04319
TCGA-AG-3901-01	TME-C1	READ	Stage III	0.43	3.57832
TCGA-AG-3726-01	TME-C1	READ	Stage I	0.77	1.60944
TCGA-AG-3896-01	TME-C1	READ	Stage I	0.7	2.56495
TCGA-AG-3581-01	TME-C1	READ	Stage I	0.65	3.06253
TCGA-AG-4001-01	TME-C1	READ	Stage II	0.64	2.68595
TCGA-AG-3586-01	TME-C1	READ	Stage III	0.75	2.61563
TCGA-AG-3909-01	TME-C1	READ	Stage III	0.72	2.62505
TCGA-AG-3878-01	TME-C1	READ	Stage I	0.44	3.14734
TCGA-AG-3605-01	TME-C1	READ	Stage IV	0.71	2.92069
TCGA-AG-3601-01	TME-C1	READ	Stage III	0.84	1.54983
TCGA-AG-3881-01	TME-C1	READ	Stage II	0.73	1.73287
TCGA-AG-3600-01	TME-C1	READ	Stage III	0.82	3.11024
TCGA-AG-3599-01	TME-C1	READ	Stage I	0.83	3.01495
TCGA-AG-3584-01	TME-C1	READ	Stage IV	0.77	2.75167
TCGA-AG-A036-01	TME-C1	READ	Stage III	NA	0
TCGA-AG-3593-01	TME-C1	READ	Stage II	0.83	2.38334
TCGA-AG-A01Y-01	TME-C1	READ	Stage II	0.79	2.59935
TCGA-AG-3580-01	TME-C1	READ	Stage I	0.72	3.22941
TCGA-AG-A002-01	TME-C1	READ	Stage I	0.82	1.03972
TCGA-AG-3728-01	TME-C1	READ	Stage III	0.65	3.67693
TCGA-AF-3400-01	TME-C1	READ	Stage II	0.29	2.91249
TCGA-AF-2691-01	TME-C1	READ	Stage I	0.43	2.8951
TCGA-AG-A01N-01	TME-C1	READ	Stage IV	0.73	1.38629
TCGA-AG-3608-01	TME-C1	READ	Stage II	0.74	3.78049
TCGA-AG-3594-01	TME-C1	READ	Stage II	0.64	3.40151
TCGA-AG-A02X-01	TME-C1	READ	Stage I	0.9	1.09861
TCGA-AG-3587-01	TME-C1	READ	Stage I	0.87	2.30259
TCGA-AG-3894-01	TME-C1	READ	Stage II	0.81	0.693147
TCGA-AG-3999-01	TME-C1	READ	Stage III	0.8	1.79176
TCGA-AG-A00C-01	TME-C1	READ	Stage III	0.78	1.8867
TCGA-AG-4007-01	TME-C1	READ	Stage IV	0.8	3.12029
TCGA-AG-A016-01	TME-C1	READ	Stage IV	0.89	0.693147
TCGA-AG-3575-01	TME-C1	READ	Stage II	0.74	2.48491
TCGA-AG-A008-01	TME-C1	READ	Stage I	0.94	1.74787
TCGA-AG-A015-01	TME-C1	READ	Stage I	0.89	1.09861
TCGA-AG-3892-01	TME-C1	READ	Stage I	0.4	2.98297
TCGA-AG-3898-01	TME-C1	READ	Stage II	0.7	0.693147
TCGA-AG-3578-01	TME-C1	READ	Stage II	0.86	2.79851
TCGA-AG-3574-01	TME-C1	READ	Stage II	0.87	2.68595
TCGA-AG-4005-01	TME-C1	READ	Stage IV	0.77	2.56495
TCGA-AG-3583-01	TME-C1	READ	Stage IV	0.77	2.84648
TCGA-AG-A00Y-01	TME-C1	READ	Stage II	0.7	2.04319
TCGA-AG-3890-01	TME-C1	READ	Stage I	0.68	3.17015
TCGA-AG-3882-01	TME-C1	READ	Stage I	0.71	3.05707
TCGA-AG-3598-01	TME-C1	READ	Stage II	0.87	2.35167
TCGA-AG-3602-01	TME-C1	READ	Stage III	0.62	3.0843
TCGA-AF-2692-01	TME-C1	READ	Stage II	0.79	2.30259
TCGA-VQ-A91Z-01	TME-C1	GAD	Stage III	0.83	2.04319
TCGA-HU-A4HD-01	TME-C1	GAD	Stage III	0.61	4.55878
TCGA-D7-8573-01	TME-C1	GAD	Stage II	0.71	3.92734
TCGA-BR-8679-01	TME-C1	GAD	Stage I	0.67	2.47912
TCGA-CG-5726-01	TME-C1	GAD	Stage I	0.91	3.05064
TCGA-VQ-AA6A-01	TME-C1	GAD	Stage III	0.81	3.82465
TCGA-R5-A7ZR-01	TME-C1	GAD	Stage III	0.75	3.49848
TCGA-BR-8680-01	TME-C1	GAD	Stage IV	0.68	2.6225
TCGA-VQ-A8P2-01	TME-C1	GAD	Stage III	0.84	3.32091
TCGA-VQ-A92D-01	TME-C1	GAD	Stage I	0.74	3.52717
TCGA-HU-A4GT-01	TME-C1	GAD	Stage II	0.8	3.58166
TCGA-D7-A74A-01	TME-C1	GAD	Stage III	0.9	4.25865
TCGA-HU-A4H2-01	TME-C1	GAD	Stage III	0.58	4.81416
TCGA-CG-4442-01	TME-C1	GAD	Stage I	0.73	1.32966
TCGA-BR-7717-01	TME-C1	GAD	Stage IV	0.61	3.72012
TCGA-CG-4475-01	TME-C1	GAD	Stage II	0.53	2.33837
TCGA-BR-4369-01	TME-C1	GAD	NON	0.6	3.97563
TCGA-HU-A4GP-01	TME-C1	GAD	Stage II	0.78	NA
TCGA-HU-A4GD-01	TME-C1	GAD	Stage II	0.76	2.77598
TCGA-VQ-A8PK-01	TME-C1	GAD	Stage III	0.59	3.36327
TCGA-BR-7707-01	TME-C1	GAD	Stage I	0.59	1.30855
TCGA-D7-6519-01	TME-C1	GAD	Stage III	0.82	3.00248
TCGA-CG-4440-01	TME-C1	GAD	Stage IV	0.65	2.16396
TCGA-VQ-A94U-01	TME-C1	GAD	Stage II	0.71	2.53259
TCGA-BR-A4CR-01	TME-C1	GAD	Stage III	0.84	2.37049
TCGA-BR-7197-01	TME-C1	GAD	Stage II	0.69	2.71296
TCGA-VQ-A8E0-01	TME-C1	GAD	Stage III	0.54	3.9279
TCGA-IN-A6RL-01	TME-C1	GAD	Stage III	0.59	2.93174
TCGA-HU-A4GF-01	TME-C1	GAD	Stage II	0.71	4.3593
TCGA-CD-5800-01	TME-C1	GAD	Stage II	0.58	3.77439
TCGA-CG-4462-01	TME-C1	GAD	Stage IV	0.22	3.17608
TCGA-VQ-A8PX-01	TME-C1	GAD	Stage I	0.53	3.88397
TCGA-VQ-A8PB-01	TME-C1	GAD	Stage II	0.61	4.54714
TCGA-D7-6822-01	TME-C1	GAD	Stage I	0.76	3.74284
TCGA-R5-A7O7-01	TME-C1	GAD	Stage IV	0.32	3.25044
TCGA-VQ-A8DZ-01	TME-C1	GAD	Stage IV	0.68	3.70668
TCGA-BR-A4CS-01	TME-C1	GAD	Stage III	0.53	2.92898
TCGA-CG-4438-01	TME-C1	GAD	Stage IV	0.73	3.89806
TCGA-BR-4368-01	TME-C1	GAD	Stage IV	0.46	4.04287
TCGA-IN-A6RO-01	TME-C1	GAD	Stage I	0.91	3.86959
TCGA-D7-A6EX-01	TME-C1	GAD	Stage III	0.83	3.87346
TCGA-HU-A4G9-01	TME-C1	GAD	Stage I	0.88	1.88916
TCGA-VQ-A8DV-01	TME-C1	GAD	Stage I	0.74	2.02842
TCGA-BR-8483-01	TME-C1	GAD	Stage III	0.82	2.92584
TCGA-R5-A7ZE-01	TME-C1	GAD	Stage III	0.61	2.79851
TCGA-BR-4367-01	TME-C1	GAD	NON	0.54	3.18256
TCGA-BR-8687-01	TME-C1	GAD	Stage III	0.69	3.63314
TCGA-VQ-A925-01	TME-C1	GAD	Stage III	0.73	4.51748
TCGA-CD-A48A-01	TME-C1	GAD	Stage II	0.8	3.02218
TCGA-B7-A5TJ-01	TME-C1	GAD	Stage II	0.72	2.92529
TCGA-BR-4294-01	TME-C1	GAD	NON	0.93	1.69574
TCGA-IN-7806-01	TME-C1	GAD	Stage II	0.63	3.73979
TCGA-HU-A4GC-01	TME-C1	GAD	Stage III	0.37	NA
TCGA-VQ-A8P5-01	TME-C1	GAD	Stage II	0.58	3.69584
TCGA-CG-4466-01	TME-C1	GAD	Stage I	0.88	1.73513
TCGA-BR-8369-01	TME-C1	GAD	Stage III	0.4	3.53505
TCGA-CG-4444-01	TME-C1	GAD	Stage III	0.65	3.40132
TCGA-BR-7715-01	TME-C1	GAD	Stage II	0.77	3.8994
TCGA-VQ-A927-01	TME-C1	GAD	Stage III	NA	3.04048
TCGA-D7-A6EV-01	TME-C1	GAD	Stage II	0.65	3.68388
TCGA-BR-4363-01	TME-C1	GAD	NON	0.64	3.46986
TCGA-IN-A7NT-01	TME-C1	GAD	Stage II	0.58	2.20083
TCGA-IN-A6RN-01	TME-C1	GAD	Stage II	0.6	1.49418
TCGA-HU-A4GH-01	TME-C1	GAD	Stage I	0.81	3.84757
TCGA-HU-A4H8-01	TME-C1	GAD	Stage I	0.72	4.21888
TCGA-BR-4370-01	TME-C1	GAD	NON	0.43	3.55386
TCGA-CG-4476-01	TME-C1	GAD	Stage III	0.38	3.74977
TCGA-VQ-A8DU-01	TME-C1	GAD	Stage III	0.65	3.32532
TCGA-CG-4443-01	TME-C1	GAD	Stage I	0.87	1.03972
TCGA-D7-6815-01	TME-C1	GAD	Stage II	0.81	3.60437
TCGA-IN-A6RR-01	TME-C1	GAD	Stage III	0.78	2.35642
TCGA-VQ-A928-01	TME-C1	GAD	Stage IV	0.57	3.93059
TCGA-BR-8059-01	TME-C1	GAD	Stage III	0.39	3.04281
TCGA-VQ-A8DT-01	TME-C1	GAD	Stage III	0.91	4.23357
TCGA-VQ-A91D-01	TME-C1	GAD	Stage III	0.69	4.40057
TCGA-CG-4306-01	TME-C1	GAD	Stage IV	0.51	2.43583
TCGA-CG-4436-01	TME-C1	GAD	Stage I	0.66	2.52455
TCGA-VQ-A94T-01	TME-C1	GAD	Stage III	0.82	2.68155
TCGA-VQ-A8PU-01	TME-C1	GAD	Stage III	0.79	1.09861
TCGA-VQ-A8PJ-01	TME-C1	GAD	Stage IV	0.78	3.60631
TCGA-IN-A6RI-01	TME-C1	GAD	Stage I	0.68	2.62505
TCGA-FP-8631-01	TME-C1	GAD	Stage III	0.68	2.74865
TCGA-D7-6526-01	TME-C1	GAD	Stage III	0.78	3.52637
TCGA-CD-8528-01	TME-C1	GAD	Stage III	0.66	2.9907
TCGA-KB-A93H-01	TME-C1	GAD	Stage II	0.79	1.59406
TCGA-BR-4366-01	TME-C1	GAD	NON	0.81	1.90615
TCGA-SW-A7EA-01	TME-C1	GAD	Stage I	0.66	3.09048
TCGA-HU-A4G3-01	TME-C1	GAD	Stage II	NA	3.22422
TCGA-R5-A7ZF-01	TME-C1	GAD	Stage IV	0.34	1.89096
TCGA-CD-A487-01	TME-C1	GAD	Stage II	0.48	2.57802
TCGA-VQ-A922-01	TME-C1	GAD	Stage IV	0.61	3.43031
TCGA-BR-8368-01	TME-C1	GAD	Stage I	0.74	4.76187
TCGA-BR-4357-01	TME-C1	GAD	NON	0.49	3.08976
TCGA-BR-4371-01	TME-C1	GAD	NON	0.9	2.30566
TCGA-VQ-A91N-01	TME-C1	GAD	Stage IV	0.68	3.14962
TCGA-VQ-A94O-01	TME-C1	GAD	Stage III	0.77	4.70906
TCGA-VQ-AA64-01	TME-C1	GAD	Stage III	0.57	4.36384
TCGA-VQ-A91V-01	TME-C1	GAD	Stage III	0.85	3.15668
TCGA-FP-A8CX-01	TME-C1	GAD	Stage III	0.36	3.8144
TCGA-VQ-AA6G-01	TME-C1	GAD	Stage II	0.61	3.27256
TCGA-CG-4465-01	TME-C1	GAD	Stage IV	0.67	2.78047
TCGA-HU-A4H5-01	TME-C1	GAD	Stage I	0.74	3.49858
TCGA-F1-6875-01	TME-C1	GAD	Stage I	0.91	2.30259
TCGA-HF-A5NB-01	TME-C1	GAD	Stage III	0.92	4.21249
TCGA-BR-8678-01	TME-C1	GAD	Stage I	0.82	3.87555
TCGA-D7-6528-01	TME-C1	GAD	Stage I	0.75	2.24504
TCGA-CG-4305-01	TME-C1	GAD	Stage II	0.42	2.96787
TCGA-CD-A4MH-01	TME-C1	GAD	Stage II	0.62	4.24648
TCGA-CD-A4MG-01	TME-C1	GAD	Stage II	0.65	4.1081
TCGA-F1-6177-01	TME-C1	GAD	Stage I	0.87	4.21529
TCGA-BR-4201-01	TME-C1	GAD	NON	0.37	3.25781
TCGA-BR-4361-01	TME-C1	GAD	Stage III	0.67	3.76602
TCGA-CG-4301-01	TME-C1	GAD	Stage IV	0.4	3.1967
TCGA-BR-A44U-01	TME-C1	GAD	Stage III	0.66	1.95088
TCGA-CG-4469-01	TME-C1	GAD	Stage IV	0.83	2.54753
TCGA-VQ-A8PH-01	TME-C1	GAD	Stage III	0.62	4.4233
TCGA-D7-8576-01	TME-C1	GAD	Stage III	0.65	3.76804
TCGA-VQ-A8E7-01	TME-C1	GAD	Stage IV	0.67	3.29548
TCGA-RD-A8N6-01	TME-C1	GAD	Stage III	0.72	3.35322
TCGA-CD-8535-01	TME-C1	GAD	Stage III	0.93	1.27885
TCGA-VQ-A91X-01	TME-C1	GAD	Stage III	0.7	2.83169
TCGA-D7-6527-01	TME-C1	GAD	Stage II	0.69	4.16575
TCGA-BR-8289-01	TME-C1	GAD	Stage IV	0.66	4.47916
TCGA-3M-AB46-01	TME-C1	GAD	Stage I	0.73	2.52392
TCGA-HU-A4H3-01	TME-C1	GAD	Stage III	0.74	3.32471
TCGA-BR-4267-01	TME-C1	GAD	Stage I	0.74	4.3902
TCGA-IN-A6RJ-01	TME-C1	GAD	Stage I	0.29	1.88916
TCGA-VQ-AA6D-01	TME-C1	GAD	Stage III	0.81	2.9169
TCGA-CG-4304-01	TME-C1	GAD	Stage I	0.58	3.46474
TCGA-RD-A7BT-01	TME-C1	GAD	Stage IV	0.65	4.62747
TCGA-VQ-A91Q-01	TME-C1	GAD	Stage IV	0.69	1.38661
TCGA-HU-A4GU-01	TME-C1	GAD	Stage II	0.81	3.42538
TCGA-IN-AB1V-01	TME-C1	GAD	Stage I	0.36	3.43759
TCGA-EQ-8122-01	TME-C1	GAD	Stage II	0.65	3.31636
TCGA-CD-5799-01	TME-C1	GAD	Stage II	0.74	1.80475
TCGA-BR-A4J6-01	TME-C1	GAD	Stage II	0.6	3.76171
TCGA-L5-A4OI-01	TME-C1	ESCA	Stage III	0.84	3.22241
TCGA-R6-A6XQ-01	TME-C1	ESCA	NON	0.89	1.09861
TCGA-2H-A9GM-01	TME-C1	ESCA	Stage II	NA	3.55743
TCGA-JY-A6FB-01	TME-C1	ESCA	Stage I	0.72	2.75167
TCGA-JY-A93C-01	TME-C1	ESCA	Stage III	0.75	2.99467
TCGA-L7-A6VZ-01	TME-C1	ESCA	Stage III	NA	3.80953
TCGA-R6-A6DN-01	TME-C1	ESCA	NON	0.82	3.92554
TCGA-JY-A6FH-01	TME-C1	ESCA	Stage II	0.84	3.45029
TCGA-V5-A7RE-01	TME-C1	ESCA	Stage I	0.71	NA
TCGA-2H-A9GR-01	TME-C1	ESCA	Stage II	0.56	3.33415
TCGA-IG-A4QS-01	TME-C1	ESCA	Stage III	0.81	2.5406
TCGA-R6-A8WC-01	TME-C1	ESCA	NON	0.94	2.73634
TCGA-L5-A8NJ-01	TME-C1	ESCA	Stage III	0.89	2.66941
TCGA-L5-A8NE-01	TME-C1	ESCA	Stage II	0.76	3.82081
TCGA-R6-A6L4-01	TME-C1	ESCA	NON	0.52	1.973
TCGA-L5-A4ON-01	TME-C1	ESCA	Stage II	NA	3.37048
TCGA-L5-A88V-01	TME-C1	ESCA	Stage III	0.85	3.1594
TCGA-VR-AA4D-01	TME-C1	ESCA	Stage II	0.83	2.30667
TCGA-2H-A9GI-01	TME-C1	ESCA	Stage III	0.67	3.66687
TCGA-V5-AASW-01	TME-C1	ESCA	NON	0.79	3.76216
TCGA-L5-A4OX-01	TME-C1	ESCA	Stage II	0.7	4.26899
TCGA-L5-A8NF-01	TME-C1	ESCA	Stage IV	0.87	3.07642
TCGA-L5-A8NH-01	TME-C1	ESCA	Stage IV	0.71	1.04031
TCGA-L5-A4OH-01	TME-C1	ESCA	Stage I	0.72	3.48874
TCGA-L5-A8NR-01	TME-C1	ESCA	Stage III	0.75	3.01534
TCGA-RE-A7BO-01	TME-C1	ESCA	Stage II	0.59	1.79176
TCGA-VR-A8EQ-01	TME-C1	ESCA	Stage III	0.45	4.64222
TCGA-2H-A9GO-01	TME-C1	ESCA	Stage IV	0.5	1.31679
TCGA-L5-A891-01	TME-C1	ESCA	NON	0.85	2.27187
TCGA-L5-A8NI-01	TME-C1	ESCA	Stage III	0.63	4.26854
TCGA-R6-A8W8-01	TME-C1	ESCA	NON	0.77	4.44767
TCGA-R6-A6XG-01	TME-C1	ESCA	NON	0.83	1.74807
TCGA-L5-A4OJ-01	TME-C1	ESCA	Stage I	0.76	4.09579
TCGA-2H-A9GN-01	TME-C1	ESCA	Stage III	0.82	3.90634
TCGA-2H-A9GH-01	TME-C1	ESCA	Stage II	NA	3.27334
TCGA-V5-A7RB-01	TME-C1	ESCA	NON	0.63	3.93608
TCGA-M9-A5M8-01	TME-C1	ESCA	Stage II	0.6	2.58807
TCGA-L5-A8NN-01	TME-C1	ESCA	Stage III	0.65	4.0726
TCGA-L5-A4OW-01	TME-C1	ESCA	Stage II	0.61	3.96082
TCGA-AZ-4615-01	TME-C2	COAD	Stage III	0.65	2.79851
TCGA-A6-6138-01	TME-C2	COAD	Stage I	0.63	3.54501
TCGA-CK-5916-01	TME-C2	COAD	Stage I	0.58	2.36938
TCGA-A6-2686-01	TME-C2	COAD	Stage II	0.68	3.4451
TCGA-CA-6717-01	TME-C2	COAD	Stage II	NA	3.97584
TCGA-A6-6780-01	TME-C2	COAD	Stage II	0.7	3.20478
TCGA-AY-6196-01	TME-C2	COAD	Stage III	0.46	4.10124
TCGA-AZ-4323-01	TME-C2	COAD	Stage IV	0.21	4.79232
TCGA-F4-6703-01	TME-C2	COAD	Stage II	0.17	3.08189
TCGA-A6-6654-01	TME-C2	COAD	Stage III	0.39	3.13549
TCGA-G4-6628-01	TME-C2	COAD	Stage I	0.52	3.7262
TCGA-AA-A01P-01	TME-C2	COAD	Stage III	0.38	3.22128
TCGA-CM-6169-01	TME-C2	COAD	Stage II	0.69	2.42548
TCGA-CM-6162-01	TME-C2	COAD	Stage III	0.49	3.1418
TCGA-F4-6807-01	TME-C2	COAD	Stage III	0.54	3.10797
TCGA-5M-AAT6-01	TME-C2	COAD	Stage IV	0.26	3.1065
TCGA-CA-6718-01	TME-C2	COAD	Stage II	0.49	3.17608
TCGA-AD-6899-01	TME-C2	COAD	Stage III	0.67	3.3071
TCGA-AA-3685-01	TME-C2	COAD	Stage II	0.67	2.58231
TCGA-AD-6964-01	TME-C2	COAD	NON	0.5	3.37919
TCGA-F4-6570-01	TME-C2	COAD	Stage II	0.6	3.16937
TCGA-AA-3489-01	TME-C2	COAD	Stage II	0.32	NA
TCGA-A6-A565-01	TME-C2	COAD	Stage III	0.19	3.57345
TCGA-A6-6651-01	TME-C2	COAD	Stage III	0.43	3.8843
TCGA-D5-6928-01	TME-C2	COAD	Stage II	0.33	4.30102
TCGA-D5-6534-01	TME-C2	COAD	Stage II	0.34	4.15968
TCGA-D5-6529-01	TME-C2	COAD	Stage II	0.46	3.04073
TCGA-EI-6511-01	TME-C2	READ	Stage III	0.66	3.46799
TCGA-AG-3731-01	TME-C2	READ	Stage IV	0.45	3.52636
TCGA-AF-2687-01	TME-C2	READ	Stage III	0.52	2.75167
TCGA-DC-6156-01	TME-C2	READ	Stage IV	0.58	3.25254
TCGA-AG-3902-01	TME-C2	READ	Stage II	0.55	3.46413
TCGA-AF-2690-01	TME-C2	READ	Stage III	0.48	3.91197
TCGA-AH-6547-01	TME-C2	READ	NON	0.37	3.55692
TCGA-F5-6464-01	TME-C2	READ	Stage III	0.53	2.8571
TCGA-D7-5577-01	TME-C2	GAD	Stage III	0.65	5.10775
TCGA-D7-6818-01	TME-C2	GAD	Stage III	0.48	3.8894
TCGA-BR-4280-01	TME-C2	GAD	Stage III	0.76	3.98492
TCGA-D7-8572-01	TME-C2	GAD	Stage II	0.43	4.9343
TCGA-BR-7959-01	TME-C2	GAD	Stage III	0.49	4.36107
TCGA-BR-6453-01	TME-C2	GAD	Stage II	0.2	5.80195
TCGA-HF-7132-01	TME-C2	GAD	Stage II	0.4	6.06159
TCGA-BR-A4IV-01	TME-C2	GAD	Stage III	0.6	3.83139
TCGA-CG-5718-01	TME-C2	GAD	Stage II	0.61	4.70416
TCGA-RD-A8N2-01	TME-C2	GAD	Stage I	NA	4.17172
TCGA-ZA-A8F6-01	TME-C2	GAD	Stage I	0.42	3.99056
TCGA-IN-A7NR-01	TME-C2	GAD	Stage IV	0.19	3.93694
TCGA-BR-6456-01	TME-C2	GAD	Stage II	0.43	5.08687
TCGA-CD-8524-01	TME-C2	GAD	Stage II	0.47	4.72772
TCGA-VQ-A8PO-01	TME-C2	GAD	Stage II	0.55	5.16013
TCGA-VQ-A94R-01	TME-C2	GAD	Stage IV	0.72	4.8707
TCGA-FP-8211-01	TME-C2	GAD	Stage II	0.71	5.09084
TCGA-D7-A747-01	TME-C2	GAD	Stage II	0.18	4.58871
TCGA-KB-A93G-01	TME-C2	GAD	Stage I	0.21	3.81069
TCGA-RD-A8MV-01	TME-C2	GAD	Stage III	0.33	5.10299
TCGA-BR-4256-01	TME-C2	GAD	NON	0.36	5.09476
TCGA-FP-7735-01	TME-C2	GAD	Stage I	NA	5.1674
TCGA-IN-A6RS-01	TME-C2	GAD	Stage I	0.5	3.76339
TCGA-BR-8487-01	TME-C2	GAD	Stage II	0.83	3.5375
TCGA-CG-5717-01	TME-C2	GAD	Stage II	0.23	4.82034
TCGA-HU-8249-01	TME-C2	GAD	Stage III	0.86	4.2559
TCGA-BR-6454-01	TME-C2	GAD	Stage II	0.44	4.74188
TCGA-BR-7722-01	TME-C2	GAD	Stage II	0.7	3.80473
TCGA-BR-7958-01	TME-C2	GAD	Stage III	0.46	4.52761
TCGA-VQ-A94P-01	TME-C2	GAD	Stage IV	0.11	4.85426
TCGA-D7-8575-01	TME-C2	GAD	Stage III	0.65	4.34549
TCGA-VQ-A8PP-01	TME-C2	GAD	Stage IV	0.6	4.2483
TCGA-BR-8372-01	TME-C2	GAD	Stage III	0.71	5.1808
TCGA-VQ-A91Y-01	TME-C2	GAD	Stage III	0.39	5.40045
TCGA-CG-5732-01	TME-C2	GAD	Stage IV	0.58	3.21749
TCGA-RD-A8MW-01	TME-C2	GAD	Stage III	0.35	3.50132
TCGA-KB-A6F7-01	TME-C2	GAD	Stage I	0.6	4.85023
TCGA-BR-8382-01	TME-C2	GAD	Stage III	0.39	2.68064
TCGA-R5-A7ZI-01	TME-C2	GAD	Stage IV	0.4	4.47651
TCGA-BR-8588-01	TME-C2	GAD	Stage II	0.29	4.49963
TCGA-CD-5801-01	TME-C2	GAD	Stage III	0.44	4.40135
TCGA-CD-8530-01	TME-C2	GAD	Stage II	0.38	4.26014
TCGA-D7-8578-01	TME-C2	GAD	Stage I	0.34	3.89283
TCGA-BR-6458-01	TME-C2	GAD	Stage II	0.55	NA
TCGA-BR-8284-01	TME-C2	GAD	Stage III	0.52	5.71249
TCGA-3M-AB47-01	TME-C2	GAD	Stage III	0.41	4.47653
TCGA-BR-8381-01	TME-C2	GAD	Stage II	0.37	5.28988
TCGA-BR-4191-01	TME-C2	GAD	NON	0.53	3.54026
TCGA-MX-A666-01	TME-C2	GAD	Stage II	0.48	4.52003
TCGA-CD-A486-01	TME-C2	GAD	Stage II	0.72	3.9684
TCGA-BR-8077-01	TME-C2	GAD	Stage III	0.78	4.34326
TCGA-MX-A663-01	TME-C2	GAD	Stage II	0.37	4.27341
TCGA-BR-A44T-01	TME-C2	GAD	Stage II	0.64	5.92361
TCGA-HU-A4H6-01	TME-C2	GAD	Stage III	0.27	3.00482
TCGA-RD-A7BW-01	TME-C2	GAD	Stage I	0.17	4.51518
TCGA-D7-8570-01	TME-C2	GAD	Stage III	0.33	2.39705
TCGA-CG-5720-01	TME-C2	GAD	Stage I	0.63	NA
TCGA-D7-8579-01	TME-C2	GAD	Stage II	0.26	4.80088
TCGA-IP-7968-01	TME-C2	GAD	Stage III	0.73	NA
TCGA-BR-8371-01	TME-C2	GAD	Stage III	0.95	5.00617
TCGA-KB-A93J-01	TME-C2	GAD	Stage II	0.7	3.54795
TCGA-D7-A4YU-01	TME-C2	GAD	Stage III	0.45	4.96177
TCGA-BR-6705-01	TME-C2	GAD	Stage III	0.18	3.57377
TCGA-BR-6803-01	TME-C2	GAD	Stage II	0.28	5.33572
TCGA-BR-6564-01	TME-C2	GAD	Stage III	0.21	NA
TCGA-D7-A4YX-01	TME-C2	GAD	Stage II	0.56	4.74531
TCGA-CG-4441-01	TME-C2	GAD	Stage III	0.64	3.73728
TCGA-CG-5719-01	TME-C2	GAD	Stage IV	0.43	4.00825
TCGA-HU-A4GX-01	TME-C2	GAD	Stage III	0.54	4.31527
TCGA-VQ-A8PC-01	TME-C2	GAD	Stage III	0.31	4.3838
TCGA-CD-8526-01	TME-C2	GAD	Stage III	0.4	2.59739
TCGA-BR-8380-01	TME-C2	GAD	Stage III	0.26	4.35261
TCGA-VQ-A8PQ-01	TME-C2	GAD	Stage IV	0.18	6.98812
TCGA-BR-8291-01	TME-C2	GAD	Stage II	0.32	5.01737
TCGA-HU-A4GQ-01	TME-C2	GAD	Stage III	0.57	3.37142
TCGA-BR-8081-01	TME-C2	GAD	Stage II	0.37	5.56452
TCGA-HU-A4H4-01	TME-C2	GAD	Stage II	0.42	5.00507
TCGA-VQ-A91K-01	TME-C2	GAD	Stage III	0.72	5.03454
TCGA-BR-8297-01	TME-C2	GAD	Stage III	0.39	4.87537
TCGA-BR-8683-01	TME-C2	GAD	Stage III	0.77	4.1449
TCGA-F1-A72C-01	TME-C2	GAD	Stage II	0.38	3.29277
TCGA-VQ-A8PM-01	TME-C2	GAD	Stage IV	0.28	4.57819
TCGA-IN-7808-01	TME-C2	GAD	NON	0.37	5.59288
TCGA-HU-A4G8-01	TME-C2	GAD	Stage II	0.52	4.35634
TCGA-IN-8462-01	TME-C2	GAD	Stage II	0.53	NA
TCGA-BR-A4J4-01	TME-C2	GAD	Stage III	0.47	3.43723
TCGA-VQ-AA6F-01	TME-C2	GAD	Stage II	0.29	4.39608
TCGA-BR-A4J8-01	TME-C2	GAD	Stage III	0.65	3.45324
TCGA-BR-6707-01	TME-C2	GAD	Stage II	0.54	4.37569
TCGA-BR-8682-01	TME-C2	GAD	Stage II	0.48	4.61449
TCGA-HU-A4H0-01	TME-C2	GAD	Stage III	0.32	4.9935
TCGA-BR-8677-01	TME-C2	GAD	Stage III	0.25	4.66589
TCGA-FP-7998-01	TME-C2	GAD	Stage III	0.28	4.65923
TCGA-D7-8574-01	TME-C2	GAD	Stage III	0.13	5.45162
TCGA-CD-8532-01	TME-C2	GAD	Stage II	0.47	4.79341
TCGA-D7-A4Z0-01	TME-C2	GAD	Stage II	0.33	4.98828
TCGA-BR-8590-01	TME-C2	GAD	Stage III	0.46	5.23555
TCGA-D7-A748-01	TME-C2	GAD	Stage IV	0.16	4.27575
TCGA-VQ-A91U-01	TME-C2	GAD	Stage III	0.7	3.35728
TCGA-CG-4477-01	TME-C2	GAD	Stage I	0.45	3.3655
TCGA-RD-A8N5-01	TME-C2	GAD	Stage III	0.19	2.99964
TCGA-D7-A6EZ-01	TME-C2	GAD	Stage III	0.68	4.86183
TCGA-VQ-A8PD-01	TME-C2	GAD	Stage III	0.17	5.48456
TCGA-VQ-A924-01	TME-C2	GAD	Stage II	0.6	3.89806
TCGA-FP-A9TM-01	TME-C2	GAD	Stage II	0.33	4.716
TCGA-BR-6852-01	TME-C2	GAD	Stage II	0.36	NA
TCGA-BR-4257-01	TME-C2	GAD	NON	0.61	4.33426
TCGA-BR-A4J9-01	TME-C2	GAD	Stage II	0.99	4.52618
TCGA-BR-7723-01	TME-C2	GAD	Stage III	0.72	0.964502
TCGA-RD-A8NB-01	TME-C2	GAD	Stage III	NA	4.98711
TCGA-D7-6520-01	TME-C2	GAD	Stage III	0.67	4.26328
TCGA-BR-6452-01	TME-C2	GAD	Stage II	0.48	3.58468
TCGA-BR-A4J7-01	TME-C2	GAD	Stage II	0.55	3.95061
TCGA-VQ-A8P8-01	TME-C2	GAD	Stage II	NA	4.22847
TCGA-BR-7901-01	TME-C2	GAD	Stage II	0.51	3.28183
TCGA-BR-6565-01	TME-C2	GAD	Stage II	0.53	4.35927
TCGA-HU-A4G2-01	TME-C2	GAD	Stage II	0.71	3.74193
TCGA-IN-A7NU-01	TME-C2	GAD	Stage III	0.5	3.18473
TCGA-CD-8534-01	TME-C2	GAD	Stage II	0.94	4.28591
TCGA-VQ-AA68-01	TME-C2	GAD	Stage III	0.6	4.70838
TCGA-D7-A6EY-01	TME-C2	GAD	Stage III	0.4	5.42849
TCGA-BR-8364-01	TME-C2	GAD	Stage III	0.17	5.05833
TCGA-BR-6563-01	TME-C2	GAD	Stage II	0.23	6.05459
TCGA-CG-5721-01	TME-C2	GAD	Stage IV	0.49	NA
TCGA-HF-7133-01	TME-C2	GAD	Stage IV	0.55	3.8237
TCGA-CD-5813-01	TME-C2	GAD	Stage II	NA	4.94059
TCGA-BR-8484-01	TME-C2	GAD	Stage III	0.49	5.96688
TCGA-BR-6457-01	TME-C2	GAD	Stage II	0.23	NA
TCGA-FP-7916-01	TME-C2	GAD	Stage III	0.39	5.67929
TCGA-BR-4187-01	TME-C2	GAD	NON	0.3	4.67059
TCGA-BR-8592-01	TME-C2	GAD	Stage III	0.17	4.82566
TCGA-BR-7851-01	TME-C2	GAD	Stage II	0.63	NA
TCGA-CD-5803-01	TME-C2	GAD	Stage II	0.24	6.32951
TCGA-D7-6525-01	TME-C2	GAD	Stage III	0.61	3.42751
TCGA-RD-A8N9-01	TME-C2	GAD	Stage II	0.42	5.15898
TCGA-BR-4279-01	TME-C2	GAD	Stage II	0.32	2.99882
TCGA-BR-8080-01	TME-C2	GAD	Stage III	0.3	4.73357
TCGA-BR-A4PF-01	TME-C2	GAD	Stage III	0.58	3.93595
TCGA-CD-8531-01	TME-C2	GAD	Stage III	0.85	2.9892
TCGA-BR-8384-01	TME-C2	GAD	Stage III	0.15	4.587
TCGA-B7-A5TI-01	TME-C2	GAD	Stage III	0.59	4.09541
TCGA-VQ-AA6J-01	TME-C2	GAD	Stage III	0.33	5.72172
TCGA-CG-5724-01	TME-C2	GAD	Stage IV	0.73	3.71457
TCGA-BR-8591-01	TME-C2	GAD	Stage III	0.28	3.89567
TCGA-FP-8099-01	TME-C2	GAD	Stage II	0.76	2.01874
TCGA-F1-A448-01	TME-C2	GAD	Stage III	0.32	4.05799
TCGA-RD-A8N0-01	TME-C2	GAD	Stage III	NA	5.26661
TCGA-FP-A4BF-01	TME-C2	GAD	Stage III	0.45	4.26071
TCGA-RD-A7BS-01	TME-C2	GAD	Stage III	0.4	2.94339
TCGA-BR-7716-01	TME-C2	GAD	Stage II	0.4	5.40029
TCGA-BR-8366-01	TME-C2	GAD	Stage II	0.34	5.97706
TCGA-CG-4437-01	TME-C2	GAD	Stage II	0.53	4.43457
TCGA-CD-5804-01	TME-C2	GAD	NON	0.46	4.45402
TCGA-BR-8365-01	TME-C2	GAD	Stage II	0.25	5.35978
TCGA-D7-A6F0-01	TME-C2	GAD	Stage I	0.74	4.8219
TCGA-BR-7957-01	TME-C2	GAD	Stage IV	0.19	4.43451
TCGA-IN-AB1X-01	TME-C2	GAD	Stage II	0.41	NA
TCGA-BR-8367-01	TME-C2	GAD	Stage III	0.39	4.38785
TCGA-BR-7196-01	TME-C2	GAD	Stage IV	0.29	4.42356
TCGA-B7-A5TN-01	TME-C2	GAD	Stage II	0.61	4.3417
TCGA-VQ-A8E3-01	TME-C2	GAD	Stage II	0.63	4.0369
TCGA-BR-6455-01	TME-C2	GAD	Stage II	0.68	4.29538
TCGA-BR-6802-01	TME-C2	GAD	Stage III	0.34	NA
TCGA-B7-A5TK-01	TME-C2	GAD	Stage III	0.27	4.26913
TCGA-D7-6522-01	TME-C2	GAD	Stage I	0.08	6.08769
TCGA-FP-8209-01	TME-C2	GAD	Stage I	NA	6.0444
TCGA-FP-8210-01	TME-C2	GAD	Stage III	0.5	5.70539
TCGA-HU-8604-01	TME-C2	GAD	Stage II	0.34	4.24117
TCGA-RD-A8N1-01	TME-C2	GAD	Stage III	0.34	5.04962
TCGA-VQ-AA6K-01	TME-C2	GAD	Stage III	0.57	4.32413
TCGA-HU-8602-01	TME-C2	GAD	Stage II	0.5	4.93847
TCGA-BR-8485-01	TME-C2	GAD	Stage III	0.61	4.27502
TCGA-BR-8686-01	TME-C2	GAD	Stage III	0.44	4.51877
TCGA-BR-8589-01	TME-C2	GAD	Stage III	0.54	5.31736
TCGA-D7-6524-01	TME-C2	GAD	Stage II	0.19	4.5908
TCGA-CG-5722-01	TME-C2	GAD	Stage IV	0.29	4.323
TCGA-BR-8486-01	TME-C2	GAD	Stage I	0.62	5.01815
TCGA-VQ-A8PE-01	TME-C2	GAD	Stage III	0.55	5.06764
TCGA-BR-A4J5-01	TME-C2	GAD	Stage III	0.24	4.16475
TCGA-CD-5798-01	TME-C2	GAD	Stage II	0.19	3.41254
TCGA-ZQ-A9CR-01	TME-C2	GAD	Stage III	0.41	3.14261
TCGA-CG-5734-01	TME-C2	GAD	Stage III	0.16	NA
TCGA-R5-A805-01	TME-C2	GAD	Stage III	0.43	4.54955
TCGA-BR-4253-01	TME-C2	GAD	Stage III	0.4	4.20748
TCGA-BR-8058-01	TME-C2	GAD	Stage III	0.27	5.6258
TCGA-VQ-A8P3-01	TME-C2	GAD	Stage III	0.57	3.51532
TCGA-VQ-A8E2-01	TME-C2	GAD	Stage III	0.58	4.59607
TCGA-MX-A5UG-01	TME-C2	GAD	Stage III	0.14	4.78203
TCGA-RD-A8N4-01	TME-C2	GAD	Stage III	0.35	4.71532
TCGA-CG-5723-01	TME-C2	GAD	Stage II	0.47	3.63167
TCGA-F1-6874-01	TME-C2	GAD	Stage I	0.61	4.71317
TCGA-VQ-A923-01	TME-C2	GAD	Stage III	0.58	5.18513
TCGA-VQ-A8PF-01	TME-C2	GAD	Stage III	0.46	5.12636
TCGA-BR-8361-01	TME-C2	GAD	Stage III	0.64	4.62706
TCGA-MX-A5UJ-01	TME-C2	GAD	Stage III	0.95	4.0312
TCGA-D7-5578-01	TME-C2	GAD	Stage III	0.6	4.30822
TCGA-SW-A7EB-01	TME-C2	GAD	Stage III	0.29	4.56448
TCGA-D7-6521-01	TME-C2	GAD	Stage III	0.31	5.0053
TCGA-CD-A48C-01	TME-C2	GAD	Stage II	0.75	4.32101
TCGA-HU-8610-01	TME-C2	GAD	Stage I	0.97	5.12456
TCGA-BR-8373-01	TME-C2	GAD	Stage III	0.67	3.65153
TCGA-B7-5818-01	TME-C2	GAD	Stage I	0.72	4.5531
TCGA-D7-A6F2-01	TME-C2	GAD	Stage I	0.75	5.10067
TCGA-RD-A7C1-01	TME-C2	GAD	Stage I	0.46	3.1253
TCGA-VQ-A91S-01	TME-C2	GAD	Stage III	0.65	4.93535
TCGA-HU-A4GY-01	TME-C2	GAD	Stage III	0.24	5.87227
TCGA-HU-8608-01	TME-C2	GAD	Stage III	0.4	5.72043
TCGA-CD-A489-01	TME-C2	GAD	Stage II	0.43	4.33117
TCGA-BR-6566-01	TME-C2	GAD	Stage II	0.49	4.07954
TCGA-BR-8286-01	TME-C2	GAD	Stage II	0.65	4.45371
TCGA-CD-8529-01	TME-C2	GAD	Stage IV	0.99	4.04783
TCGA-2H-A9GK-01	TME-C2	ESCA	Stage III	0.47	4.6853
TCGA-L5-A4OG-01	TME-C2	ESCA	Stage I	0.52	4.70714
TCGA-L5-A88Y-01	TME-C2	ESCA	NON	NA	4.19134
TCGA-L5-A8NW-01	TME-C2	ESCA	Stage I	0.64	4.34998
TCGA-S8-A6BV-01	TME-C2	ESCA	Stage III	0.51	2.43079
TCGA-2H-A9GL-01	TME-C2	ESCA	Stage III	0.81	4.46588
TCGA-JY-A938-01	TME-C2	ESCA	Stage II	0.4	4.48489
TCGA-L5-A8NU-01	TME-C2	ESCA	Stage II	0.22	5.67137
TCGA-2H-A9GG-01	TME-C2	ESCA	Stage III	NA	4.39247
TCGA-Q9-A6FW-01	TME-C2	ESCA	Stage III	0.57	4.16359
TCGA-IC-A6RE-01	TME-C2	ESCA	Stage II	0.57	NA
TCGA-JY-A93D-01	TME-C2	ESCA	Stage III	0.36	4.1353
TCGA-R6-A8W5-01	TME-C2	ESCA	Stage IV	0.48	3.98442
TCGA-L5-A8NS-01	TME-C2	ESCA	Stage II	0.61	4.17815
TCGA-V5-AASX-01	TME-C2	ESCA	NON	0.65	NA
TCGA-JY-A93E-01	TME-C2	ESCA	Stage III	0.53	4.88233
TCGA-L5-A4OU-01	TME-C2	ESCA	Stage II	0.46	3.60632
TCGA-R6-A8WG-01	TME-C2	ESCA	NON	0.73	4.4553
TCGA-L5-A8NV-01	TME-C2	ESCA	Stage II	0.52	1.11821
TCGA-L5-A4OP-01	TME-C2	ESCA	Stage I	0.7	3.93785
TCGA-L5-A4OT-01	TME-C2	ESCA	Stage IV	0.63	4.36289
TCGA-L5-A4OS-01	TME-C2	ESCA	Stage II	0.36	4.86071
TCGA-L5-A8NG-01	TME-C2	ESCA	Stage III	0.51	4.02215
TCGA-L5-A8NM-01	TME-C2	ESCA	Stage II	0.29	3.80802
TCGA-L5-A8NT-01	TME-C2	ESCA	Stage II	0.63	4.62116
TCGA-R6-A6KZ-01	TME-C2	ESCA	NON	0.53	5.16932
TCGA-L5-A43C-01	TME-C2	ESCA	NON	0.3	NA
TCGA-R6-A6DQ-01	TME-C2	ESCA	NON	NA	4.14131
TCGA-L5-A4OE-01	TME-C2	ESCA	Stage III	0.59	4.79975
TCGA-L5-A4OO-01	TME-C2	ESCA	Stage III	0.41	NA
TCGA-DM-A288-01	TME-C3	COAD	Stage III	0.89	NA
TCGA-QL-A97D-01	TME-C3	COAD	Stage I	0.72	3.34865
TCGA-CM-6164-01	TME-C3	COAD	Stage II	0.57	1.60944
TCGA-G4-6299-01	TME-C3	COAD	Stage III	0.61	2.56315
TCGA-F4-6463-01	TME-C3	COAD	Stage II	0.58	1.94591
TCGA-DM-A1D9-01	TME-C3	COAD	Stage II	0.79	1.38629
TCGA-CM-6165-01	TME-C3	COAD	Stage II	0.76	2.16396
TCGA-CM-4751-01	TME-C3	COAD	Stage III	0.5	3.01495
TCGA-A6-5659-01	TME-C3	COAD	Stage I	0.85	NA
TCGA-AZ-4682-01	TME-C3	COAD	Stage IV	0.81	1.60944
TCGA-DM-A0XF-01	TME-C3	COAD	Stage III	0.59	2.35167
TCGA-CA-6715-01	TME-C3	COAD	Stage III	0.89	0
TCGA-DM-A28E-01	TME-C3	COAD	Stage II	0.93	0
TCGA-D5-6538-01	TME-C3	COAD	Stage III	0.96	0
TCGA-AA-3506-01	TME-C3	COAD	Stage I	0.66	3.01645
TCGA-AU-3779-01	TME-C3	COAD	Stage II	0.68	3.08704
TCGA-QG-A5Z1-01	TME-C3	COAD	Stage III	0.8	1.38629
TCGA-AD-6890-01	TME-C3	COAD	NON	0.71	2.61563
TCGA-A6-2685-01	TME-C3	COAD	Stage II	0.38	2.75167
TCGA-CK-5914-01	TME-C3	COAD	Stage III	0.85	1.90615
TCGA-CA-5255-01	TME-C3	COAD	Stage II	0.37	1.09861
TCGA-A6-A5ZU-01	TME-C3	COAD	Stage III	NA	1.09861
TCGA-NH-A50V-01	TME-C3	COAD	Stage III	0.61	2.70805
TCGA-QG-A5YX-01	TME-C3	COAD	Stage II	0.88	2.54004
TCGA-A6-6649-01	TME-C3	COAD	Stage III	0.55	3.19315
TCGA-NH-A6GC-01	TME-C3	COAD	Stage IV	0.86	0
TCGA-A6-4105-01	TME-C3	COAD	Stage II	0.64	2.94826
TCGA-A6-6141-01	TME-C3	COAD	Stage II	0.48	3.2581
TCGA-AZ-4684-01	TME-C3	COAD	Stage IV	0.62	2.65259
TCGA-CK-6747-01	TME-C3	COAD	Stage II	0.8	2.92642
TCGA-AU-6004-01	TME-C3	COAD	Stage I	0.47	2.99707
TCGA-QG-A5Z2-01	TME-C3	COAD	Stage I	0.5	3.30878
TCGA-F4-6459-01	TME-C3	COAD	Stage III	0.68	2.07944
TCGA-NH-A8F7-01	TME-C3	COAD	Stage II	0.91	NA
TCGA-G4-6321-01	TME-C3	COAD	Stage III	0.57	2.16396
TCGA-DM-A1D0-01	TME-C3	COAD	Stage II	0.85	NA
TCGA-G4-6307-01	TME-C3	COAD	Stage III	0.8	1.38629
TCGA-DM-A1HB-01	TME-C3	COAD	Stage III	0.74	0
TCGA-CM-6679-01	TME-C3	COAD	Stage II	0.62	2.36938
TCGA-AY-6197-01	TME-C3	COAD	Stage II	0.81	2.07944
TCGA-A6-2684-01	TME-C3	COAD	Stage I	0.61	2.87822
TCGA-AD-6548-01	TME-C3	COAD	Stage I	0.54	2.87148
TCGA-D5-6539-01	TME-C3	COAD	NON	0.34	2.3979
TCGA-G4-6302-01	TME-C3	COAD	Stage II	0.22	2.35167
TCGA-AZ-4614-01	TME-C3	COAD	Stage IV	0.85	1.33218
TCGA-NH-A5IV-01	TME-C3	COAD	Stage II	0.79	2.5993
TCGA-A6-5664-01	TME-C3	COAD	Stage III	0.41	2.67012
TCGA-AZ-4315-01	TME-C3	COAD	Stage II	0.66	1.38629
TCGA-F4-6806-01	TME-C3	COAD	Stage I	0.72	0.693147
TCGA-AY-A71X-01	TME-C3	COAD	Stage I	0.94	0
TCGA-DM-A28F-01	TME-C3	COAD	Stage III	0.74	2.27187
TCGA-G4-6293-01	TME-C3	COAD	Stage III	0.62	2.87148
TCGA-5M-AAT4-01	TME-C3	COAD	Stage IV	0.77	1.09861
TCGA-D5-6533-01	TME-C3	COAD	Stage III	0.79	2.30259
TCGA-A6-5657-01	TME-C3	COAD	Stage III	0.33	3.1418
TCGA-DM-A28K-01	TME-C3	COAD	Stage II	0.89	0
TCGA-CM-5344-01	TME-C3	COAD	Stage III	0.61	1.60944
TCGA-G4-6309-01	TME-C3	COAD	Stage III	0.81	1.60944
TCGA-AY-6386-01	TME-C3	COAD	Stage III	0.7	2.67012
TCGA-AA-A01X-01	TME-C3	COAD	Stage III	0.71	1.38629
TCGA-CM-6677-01	TME-C3	COAD	Stage II	0.65	2.36938
TCGA-CM-5861-01	TME-C3	COAD	Stage II	0.75	0
TCGA-D5-6923-01	TME-C3	COAD	Stage I	0.66	1.79176
TCGA-AZ-6605-01	TME-C3	COAD	Stage III	0.42	3.46799
TCGA-NH-A6GB-01	TME-C3	COAD	Stage III	0.71	2.04319
TCGA-CM-5349-01	TME-C3	COAD	Stage II	0.52	0.636514
TCGA-NH-A50U-01	TME-C3	COAD	Stage IV	0.87	1.09861
TCGA-G4-6627-01	TME-C3	COAD	Stage II	0.25	3.16342
TCGA-DM-A28G-01	TME-C3	COAD	Stage II	0.79	1.60944
TCGA-D5-6537-01	TME-C3	COAD	Stage III	0.83	1.79176
TCGA-D5-5539-01	TME-C3	COAD	Stage III	0.68	1.79176
TCGA-CM-6163-01	TME-C3	COAD	Stage I	0.57	3.06253
TCGA-CM-4744-01	TME-C3	COAD	Stage I	0.71	1.52443
TCGA-CK-4947-01	TME-C3	COAD	Stage III	0.61	3.05252
TCGA-CA-5256-01	TME-C3	COAD	Stage II	0.78	2.25386
TCGA-CM-6167-01	TME-C3	COAD	Stage III	0.31	3.04452
TCGA-4N-A93T-01	TME-C3	COAD	Stage III	0.84	1.79176
TCGA-CA-5797-01	TME-C3	COAD	Stage II	0.72	2.44102
TCGA-CM-6166-01	TME-C3	COAD	Stage I	0.76	1.60944
TCGA-CK-4951-01	TME-C3	COAD	Stage II	0.6	2.58857
TCGA-CA-6719-01	TME-C3	COAD	Stage II	0.69	2.5666
TCGA-A6-5666-01	TME-C3	COAD	Stage II	0.92	0.693147
TCGA-AY-5543-01	TME-C3	COAD	Stage IV	0.7	2.36938
TCGA-F4-6704-01	TME-C3	COAD	Stage III	0.65	NA
TCGA-A6-6781-01	TME-C3	COAD	Stage III	0.5	3.19315
TCGA-D5-6920-01	TME-C3	COAD	Stage II	0.41	1.90615
TCGA-D5-5538-01	TME-C3	COAD	Stage III	0.68	2.79851
TCGA-A6-6782-01	TME-C3	COAD	Stage II	0.67	2.30259
TCGA-G4-6311-01	TME-C3	COAD	Stage III	0.47	1.38629
TCGA-AZ-5403-01	TME-C3	COAD	Stage II	0.5	0.693147
TCGA-AD-6888-01	TME-C3	COAD	Stage III	0.7	0.693147
TCGA-DM-A1D6-01	TME-C3	COAD	Stage II	0.89	0
TCGA-AA-3660-01	TME-C3	COAD	Stage II	0.79	1.79176
TCGA-CM-5863-01	TME-C3	COAD	Stage III	NA	1.60944
TCGA-AZ-6598-01	TME-C3	COAD	Stage II	0.87	NA
TCGA-G4-6304-01	TME-C3	COAD	Stage II	0.23	0.693147
TCGA-DM-A285-01	TME-C3	COAD	Stage IV	0.72	NA
TCGA-G4-6294-01	TME-C3	COAD	Stage IV	0.83	2.16396
TCGA-DM-A1D4-01	TME-C3	COAD	Stage II	0.81	1.90615
TCGA-CA-6716-01	TME-C3	COAD	Stage II	0.84	1.09861
TCGA-CK-4952-01	TME-C3	COAD	Stage III	0.86	1.38629
TCGA-D5-6541-01	TME-C3	COAD	Stage II	0.58	2.73634
TCGA-D5-6532-01	TME-C3	COAD	Stage II	0.79	0
TCGA-D5-5541-01	TME-C3	COAD	Stage III	0.81	2.5384
TCGA-DM-A1DB-01	TME-C3	COAD	Stage II	0.83	2.75167
TCGA-D5-6530-01	TME-C3	COAD	Stage I	0.73	2.99573
TCGA-CM-5868-01	TME-C3	COAD	Stage IV	0.67	1.38629
TCGA-AA-3526-01	TME-C3	COAD	Stage I	0.74	2.5993
TCGA-DM-A28M-01	TME-C3	COAD	Stage II	0.84	1.73287
TCGA-D5-6926-01	TME-C3	COAD	Stage III	0.66	2.44102
TCGA-G4-6317-01	TME-C3	COAD	Stage III	0.86	NA
TCGA-CM-6680-01	TME-C3	COAD	Stage III	0.75	2.04319
TCGA-D5-6536-01	TME-C3	COAD	Stage II	0.74	NA
TCGA-AD-A5EK-01	TME-C3	COAD	Stage I	0.87	1.38629
TCGA-AA-3663-01	TME-C3	COAD	Stage II	0.79	1.54983
TCGA-AZ-6607-01	TME-C3	COAD	Stage IV	0.66	2.54004
TCGA-AZ-5407-01	TME-C3	COAD	Stage I	0.74	2.77823
TCGA-CM-5348-01	TME-C3	COAD	Stage III	0.62	2.19722
TCGA-CK-6751-01	TME-C3	COAD	Stage I	0.67	2.25386
TCGA-D5-6929-01	TME-C3	COAD	Stage IV	0.55	1.09861
TCGA-AA-3675-01	TME-C3	COAD	Stage II	0.78	2.45831
TCGA-DM-A282-01	TME-C3	COAD	Stage II	0.79	0
TCGA-D5-7000-01	TME-C3	COAD	Stage I	0.69	2.51266
TCGA-AM-5821-01	TME-C3	COAD	Stage II	0.64	2.04319
TCGA-G4-6298-01	TME-C3	COAD	Stage III	0.6	0
TCGA-NH-A8F8-01	TME-C3	COAD	Stage IV	0.69	0
TCGA-CK-5912-01	TME-C3	COAD	Stage I	0.89	1.79176
TCGA-AD-6895-01	TME-C3	COAD	Stage III	0.56	2.45831
TCGA-CM-6678-01	TME-C3	COAD	Stage IV	0.7	0.693147
TCGA-CM-5860-01	TME-C3	COAD	Stage II	0.7	1.38629
TCGA-A6-5661-01	TME-C3	COAD	Stage II	0.67	1.55958
TCGA-DM-A1DA-01	TME-C3	COAD	Stage III	0.93	1.38629
TCGA-AZ-6599-01	TME-C3	COAD	Stage I	0.85	NA
TCGA-CM-6171-01	TME-C3	COAD	Stage I	0.78	1.33218
TCGA-CM-4743-01	TME-C3	COAD	Stage II	0.42	0
TCGA-NH-A6GA-01	TME-C3	COAD	Stage III	0.79	2.19722
TCGA-A6-2675-01	TME-C3	COAD	Stage II	0.55	2.78779
TCGA-G4-6297-01	TME-C3	COAD	Stage IV	0.57	2.83321
TCGA-A6-5656-01	TME-C3	COAD	Stage I	0.81	1.60944
TCGA-DM-A0X9-01	TME-C3	COAD	Stage II	0.79	2.95043
TCGA-DM-A0XD-01	TME-C3	COAD	Stage II	0.67	NA
TCGA-AA-3511-01	TME-C3	COAD	Stage II	0.67	NA
TCGA-A6-A56B-01	TME-C3	COAD	Stage III	0.81	0
TCGA-A6-5667-01	TME-C3	COAD	Stage III	0.78	1.90615
TCGA-CM-6674-01	TME-C3	COAD	Stage II	0.5	2.15353
TCGA-DM-A1D8-01	TME-C3	COAD	NON	0.82	1.55859
TCGA-CM-6170-01	TME-C3	COAD	Stage I	0.76	1.60944
TCGA-AZ-4616-01	TME-C3	COAD	Stage IV	0.6	1.74787
TCGA-WS-AB45-01	TME-C3	COAD	Stage II	0.26	2.67012
TCGA-CM-5864-01	TME-C3	COAD	Stage I	0.89	1.03972
TCGA-CA-5254-01	TME-C3	COAD	Stage II	0.8	2.3979
TCGA-D5-6898-01	TME-C3	COAD	Stage I	0.69	2.89037
TCGA-DM-A280-01	TME-C3	COAD	Stage II	0.4	0
TCGA-QG-A5YW-01	TME-C3	COAD	Stage III	0.72	2.82156
TCGA-AD-6965-01	TME-C3	COAD	Stage III	0.86	1.60944
TCGA-CK-4948-01	TME-C3	COAD	Stage III	0.64	2.30259
TCGA-DM-A1HA-01	TME-C3	COAD	Stage III	0.93	1.24245
TCGA-5M-AAT5-01	TME-C3	NA	NA	0.82	1.09861
TCGA-F4-6809-01	TME-C3	COAD	Stage IV	0.53	2.94444
TCGA-D5-6531-01	TME-C3	COAD	Stage II	0.81	2.54004
TCGA-AM-5820-01	TME-C3	COAD	Stage IV	0.76	0
TCGA-AA-A02K-01	TME-C3	COAD	Stage IV	NA	1.09861
TCGA-AD-6889-01	TME-C3	COAD	Stage II	0.88	0.636514
TCGA-D5-6931-01	TME-C3	COAD	Stage III	0.49	2.35167
TCGA-D5-6924-01	TME-C3	COAD	Stage II	0.63	1.60944
TCGA-A6-5665-01	TME-C3	COAD	Stage II	0.72	NA
TCGA-5M-AATA-01	TME-C3	NA	NA	0.6	2.04348
TCGA-D5-6540-01	TME-C3	COAD	Stage I	0.77	2.16396
TCGA-G4-6323-01	TME-C3	COAD	Stage I	0.6	2.56495
TCGA-A6-A566-01	TME-C3	COAD	Stage III	0.4	2.61563
TCGA-AA-3712-01	TME-C3	COAD	Stage III	0.74	NA
TCGA-A6-5662-01	TME-C3	COAD	Stage IV	0.95	1.38629
TCGA-CM-6676-01	TME-C3	COAD	Stage I	0.66	1.79176
TCGA-CK-5915-01	TME-C3	COAD	Stage I	0.93	0.693147
TCGA-F4-6569-01	TME-C3	COAD	Stage I	0.42	3.15146
TCGA-F4-6461-01	TME-C3	COAD	Stage III	0.58	2.45831
TCGA-F4-6854-01	TME-C3	COAD	Stage II	0.67	2.92957
TCGA-F4-6856-01	TME-C3	COAD	Stage I	0.6	1.60944
TCGA-AY-A54L-01	TME-C3	COAD	Stage I	0.59	0.693147
TCGA-CK-6746-01	TME-C3	COAD	Stage II	0.85	3.10407
TCGA-AA-3509-01	TME-C3	COAD	Stage II	NA	1.09861
TCGA-A6-6650-01	TME-C3	COAD	Stage II	0.86	1.83102
TCGA-A6-6140-01	TME-C3	COAD	Stage II	0.82	1.56071
TCGA-A6-2682-01	TME-C3	COAD	Stage IV	NA	1.60944
TCGA-CM-6675-01	TME-C3	COAD	Stage IV	0.93	1.74787
TCGA-DM-A1D7-01	TME-C3	COAD	Stage II	0.73	1.38629
TCGA-4T-AA8H-01	TME-C3	COAD	Stage II	0.82	1.03972
TCGA-A6-6653-01	TME-C3	COAD	Stage I	0.81	2.19722
TCGA-F4-6460-01	TME-C3	COAD	Stage III	0.68	2.19722
TCGA-AA-3655-01	TME-C3	COAD	Stage II	0.87	NA
TCGA-T9-A92H-01	TME-C3	COAD	Stage II	0.79	1.38629
TCGA-AY-A8YK-01	TME-C3	COAD	Stage IV	0.7	1.79176
TCGA-CK-4950-01	TME-C3	COAD	Stage III	0.46	2.87822
TCGA-AZ-6600-01	TME-C3	COAD	Stage IV	0.6	1.09861
TCGA-AZ-6606-01	TME-C3	COAD	Stage IV	0.83	0.693147
TCGA-D5-6922-01	TME-C3	COAD	Stage III	0.71	2.56495
TCGA-A6-6137-01	TME-C3	COAD	Stage III	0.48	3.29584
TCGA-AA-3495-01	TME-C3	COAD	Stage I	0.6	2.73634
TCGA-G4-6322-01	TME-C3	COAD	Stage III	0.87	1.79176
TCGA-SS-A7HO-01	TME-C3	COAD	Stage II	0.89	1.38629
TCGA-AD-A5EJ-01	TME-C3	COAD	Stage II	0.68	0
TCGA-AA-A02Y-01	TME-C3	COAD	Stage I	0.77	2.41505
TCGA-AZ-6603-01	TME-C3	COAD	NON	0.76	2.70805
TCGA-G4-6626-01	TME-C3	COAD	Stage II	0.72	0
TCGA-G4-6306-01	TME-C3	COAD	Stage II	0.77	2.25386
TCGA-G4-6320-01	TME-C3	COAD	Stage III	0.48	0.693147
TCGA-CK-6748-01	TME-C3	COAD	Stage IV	0.79	1.90615
TCGA-A6-6142-01	TME-C3	COAD	Stage IV	0.59	1.56071
TCGA-CA-5796-01	TME-C3	COAD	Stage II	0.85	2.92642
TCGA-A6-A567-01	TME-C3	COAD	Stage IV	0.71	0
TCGA-AA-3713-01	TME-C3	COAD	Stage IV	0.57	NA
TCGA-A6-6648-01	TME-C3	COAD	Stage IV	0.58	2.58231
TCGA-A6-5660-01	TME-C3	COAD	Stage III	0.92	0.693147
TCGA-5M-AATE-01	TME-C3	COAD	Stage II	0.81	2.07944
TCGA-CM-6161-01	TME-C3	COAD	Stage I	0.7	3.04452
TCGA-AZ-4313-01	TME-C3	COAD	Stage I	0.54	0
TCGA-A6-6652-01	TME-C3	COAD	Stage IV	0.86	1.38629
TCGA-F4-6808-01	TME-C3	COAD	Stage I	0.71	0
TCGA-DM-A28C-01	TME-C3	COAD	Stage II	0.81	NA
TCGA-D5-6927-01	TME-C3	COAD	Stage II	0.49	2.58231
TCGA-AA-3492-01	TME-C3	COAD	Stage II	0.81	2.30259
TCGA-D5-6535-01	TME-C3	COAD	Stage III	0.71	2.77259
TCGA-AD-6963-01	TME-C3	COAD	NON	0.47	1.79176
TCGA-CM-4747-01	TME-C3	COAD	Stage IV	0.7	2.44102
TCGA-NH-A50T-01	TME-C3	COAD	Stage II	0.86	0
TCGA-CM-6168-01	TME-C3	COAD	Stage II	0.37	3.09104
TCGA-RU-A8FL-01	TME-C3	COAD	Stage III	0.82	NA
TCGA-AY-A69D-01	TME-C3	COAD	Stage II	0.76	1.60944
TCGA-AA-A01Z-01	TME-C3	COAD	Stage II	0.81	0
TCGA-DM-A28H-01	TME-C3	COAD	Stage III	0.74	0.693147
TCGA-G4-6586-01	TME-C3	COAD	Stage II	0.67	2.27397
TCGA-G4-6315-01	TME-C3	COAD	Stage IV	0.52	1.38629
TCGA-G4-6303-01	TME-C3	COAD	Stage IV	0.78	1.94591
TCGA-F4-6805-01	TME-C3	COAD	Stage II	0.45	2.70805
TCGA-D5-5537-01	TME-C3	COAD	Stage II	0.77	1.09861
TCGA-CM-5862-01	TME-C3	COAD	Stage IV	0.9	0
TCGA-D5-6932-01	TME-C3	COAD	Stage II	0.75	1.79176
TCGA-DM-A28A-01	TME-C3	COAD	Stage III	0.86	1.03972
TCGA-CM-6172-01	TME-C3	COAD	Stage III	0.74	1.94591
TCGA-D5-6930-01	TME-C3	COAD	Stage II	0.44	3.12029
TCGA-CK-5913-01	TME-C3	COAD	Stage II	0.7	1.33218
TCGA-AA-3496-01	TME-C3	COAD	Stage II	0.75	3.09104
TCGA-D5-5540-01	TME-C3	COAD	Stage II	0.89	1.76776
TCGA-AD-6901-01	TME-C3	COAD	NON	0.64	2.14584
TCGA-F4-6855-01	TME-C3	COAD	Stage II	0.73	1.38629
TCGA-AD-5900-01	TME-C3	COAD	Stage I	0.55	2.66808
TCGA-3L-AA1B-01	TME-C3	COAD	Stage I	0.53	2.16396
TCGA-AA-3502-01	TME-C3	COAD	Stage I	0.82	2.36938
TCGA-G4-6295-01	TME-C3	COAD	Stage II	0.76	2.947
TCGA-G4-6588-01	TME-C3	COAD	Stage II	0.61	1.79176
TCGA-QG-A5YV-01	TME-C3	COAD	Stage III	0.73	0
TCGA-EI-6884-01	TME-C3	READ	Stage III	0.45	2.67012
TCGA-DC-6154-01	TME-C3	READ	Stage IV	0.88	1.79176
TCGA-DY-A1DD-01	TME-C3	READ	Stage III	0.89	NA
TCGA-AG-4022-01	TME-C3	READ	Stage II	0.68	2.8571
TCGA-AH-6549-01	TME-C3	READ	NON	NA	1.73287
TCGA-AH-6903-01	TME-C3	READ	Stage III	0.65	1.67699
TCGA-F5-6863-01	TME-C3	READ	Stage III	0.78	1.09861
TCGA-AF-5654-01	TME-C3	READ	Stage I	0.81	NA
TCGA-DY-A1DE-01	TME-C3	READ	Stage II	0.82	1.42706
TCGA-AH-6544-01	TME-C3	READ	NON	0.55	0.636514
TCGA-DY-A1H8-01	TME-C3	READ	Stage III	0.9	0
TCGA-EI-7004-01	TME-C3	READ	Stage IV	0.49	2.75167
TCGA-AF-6136-01	TME-C3	READ	Stage III	0.67	1.86368
TCGA-DC-4745-01	TME-C3	READ	Stage III	0.84	1.94591
TCGA-EI-6883-01	TME-C3	READ	Stage II	0.81	3.06243
TCGA-EI-6917-01	TME-C3	READ	Stage III	0.52	3.20478
TCGA-F5-6861-01	TME-C3	READ	Stage II	0.56	0.693147
TCGA-EI-6508-01	TME-C3	READ	Stage III	0.79	2.27187
TCGA-F5-6465-01	TME-C3	READ	Stage II	0.58	3.31949
TCGA-AF-6672-01	TME-C3	READ	Stage IV	0.79	2.61563
TCGA-EI-6509-01	TME-C3	READ	Stage III	0.83	NA
TCGA-DC-5337-01	TME-C3	READ	Stage I	0.75	2.44102
TCGA-DC-6160-01	TME-C3	READ	Stage I	0.65	1.94591
TCGA-G5-6641-01	TME-C3	READ	Stage III	0.77	0.693147
TCGA-F5-6812-01	TME-C3	READ	Stage II	0.56	2.99573
TCGA-AH-6644-01	TME-C3	READ	NON	0.7	2.30259
TCGA-AG-3592-01	TME-C3	READ	Stage II	0.8	2.75167
TCGA-F5-6814-01	TME-C3	READ	Stage II	0.72	3.34455
TCGA-EI-6513-01	TME-C3	READ	Stage III	0.83	1.33218
TCGA-DC-6158-01	TME-C3	READ	Stage I	0.62	3.19351
TCGA-EI-6512-01	TME-C3	READ	Stage III	0.74	0.693147
TCGA-CI-6622-01	TME-C3	READ	Stage II	0.68	0
TCGA-DY-A1DC-01	TME-C3	READ	Stage II	0.73	2.07944
TCGA-DT-5265-01	TME-C3	READ	Stage II	0.65	NA
TCGA-AG-3742-01	TME-C3	READ	Stage I	0.79	1.38629
TCGA-DC-6683-01	TME-C3	READ	Stage III	0.72	1.60944
TCGA-AF-6655-01	TME-C3	READ	Stage III	0.66	1.94591
TCGA-CL-5918-01	TME-C3	READ	Stage II	0.78	1.38629
TCGA-F5-6864-01	TME-C3	READ	Stage III	0.67	2.83321
TCGA-AF-A56K-01	TME-C3	READ	Stage II	0.67	2.30259
TCGA-AG-4021-01	TME-C3	READ	Stage IV	0.81	0
TCGA-DC-5869-01	TME-C3	READ	Stage III	0.72	1.74787
TCGA-DY-A0XA-01	TME-C3	READ	Stage II	0.82	1.60944
TCGA-EF-5831-01	TME-C3	READ	Stage II	0.73	2.30259
TCGA-AG-3725-01	TME-C3	READ	Stage III	0.87	2.3979
TCGA-EI-6514-01	TME-C3	READ	Stage II	0.82	1.60944
TCGA-CI-6624-01	TME-C3	READ	Stage I	0.43	2.79851
TCGA-CI-6620-01	TME-C3	READ	Stage IV	0.6	2.48491
TCGA-CI-6621-01	TME-C3	READ	Stage III	0.59	2.81336
TCGA-EI-6510-01	TME-C3	READ	Stage IV	0.79	2.59861
TCGA-DY-A1DG-01	TME-C3	READ	Stage IV	0.95	NA
TCGA-AF-A56N-01	TME-C3	READ	Stage II	0.79	2.48491
TCGA-EI-6885-01	TME-C3	READ	Stage IV	0.73	2.63906
TCGA-AG-3732-01	TME-C3	READ	Stage I	0.67	NA
TCGA-EI-6882-01	TME-C3	READ	Stage II	0.8	1.32966
TCGA-AF-2693-01	TME-C3	READ	Stage I	0.62	2.77259
TCGA-DC-6157-01	TME-C3	READ	Stage I	0.76	1.33218
TCGA-AF-4110-01	TME-C3	READ	Stage IV	0.58	2.72555
TCGA-AG-3591-01	TME-C3	READ	Stage II	0.9	2.16822
TCGA-EI-6881-01	TME-C3	READ	Stage III	0.74	2.63906
TCGA-DC-6682-01	TME-C3	READ	Stage II	0.61	1.38629
TCGA-F5-6813-01	TME-C3	READ	Stage III	0.67	1.94591
TCGA-F5-6702-01	TME-C3	READ	Stage IV	0.47	2.45831
TCGA-CL-5917-01	TME-C3	READ	Stage III	0.83	1.03972
TCGA-CL-4957-01	TME-C3	READ	NON	0.69	1.60944
TCGA-EI-6507-01	TME-C3	READ	Stage II	0.57	2.21025
TCGA-DC-4749-01	TME-C3	READ	Stage I	0.82	0
TCGA-EF-5830-01	TME-C3	READ	Stage II	0.85	1.56071
TCGA-AF-3911-01	TME-C3	READ	Stage III	0.8	2.54004
TCGA-DC-6155-01	TME-C3	READ	Stage III	0.7	NA
TCGA-DC-6681-01	TME-C3	READ	Stage IV	0.57	2.83321
TCGA-AF-A56L-01	TME-C3	READ	Stage III	0.65	2.48491
TCGA-CI-6623-01	TME-C3	READ	Stage I	0.68	2.61563
TCGA-AH-6897-01	TME-C3	READ	Stage I	0.89	1.09861
TCGA-EI-7002-01	TME-C3	READ	Stage IV	0.86	2.19722
TCGA-EI-6506-01	TME-C3	READ	Stage II	0.46	2.70805
TCGA-AH-6643-01	TME-C3	READ	Stage III	0.82	NA
TCGA-DY-A1DF-01	TME-C3	READ	Stage III	0.95	0
TCGA-F5-6571-01	TME-C3	READ	Stage II	0.76	3.38927
TCGA-F5-6811-01	TME-C3	READ	Stage II	0.71	2.02281
TCGA-F5-6810-01	TME-C3	READ	Stage II	0.76	2.16396
TCGA-CI-6619-01	TME-C3	READ	Stage IV	0.49	2.91249
TCGA-VQ-AA69-01	TME-C3	GAD	Stage III	0.85	3.75234
TCGA-VQ-A91A-01	TME-C3	GAD	Stage III	0.49	3.35836
TCGA-IN-8663-01	TME-C3	GAD	Stage II	0.83	1.80443
TCGA-FP-7829-01	TME-C3	GAD	Stage II	0.81	3.12029
TCGA-BR-6801-01	TME-C3	GAD	Stage II	0.58	2.47996
TCGA-ZR-A9CJ-01	TME-C3	ESCA	Stage III	0.46	2.98588
TCGA-L5-A8NL-01	TME-C3	ESCA	Stage III	0.4	3.51585
TCGA-2H-A9GF-01	TME-C3	ESCA	Stage III	0.75	2.97851
TCGA-2H-A9GQ-01	TME-C3	ESCA	Stage III	0.89	0.693147

[truncated: 5 more sheets: Supplementary Table 15, Supplementary Table 17, Supplementary Table 18, Supplementary Table 20, Supplementary Table 21]
